# Supplementary material for: Burden of Neurological Disorders Across the US From 1990-2017: A Global Burden of Disease Study
Source: PubMed Central journal article supplement (PMC7607495; doi:10.1001/jamaneurol.2020.4152), 2020-11-02
Supplement: jamaneurol-e204152-s001.pdf [file jamaneurol-e204152-s001.pdf]

# Supplemental Online Content

GBD 2017 US Neurological Disorders Collaborators. Burden of neurological disorders across the US from 1990-2017: a Global Burden of Disease study. *JAMA Neurol*. Published online November 2, 2020. doi:10.1001/jamaneurol.2020.4152

**eFigure.** Age-standardized incidence, prevalence, mortality, and DALY rates per 100,000 persons for neurological disorders in the US states in 2017.

**eAppendix.**

**eTable 1.** Age-adjusted incidence, prevalence, mortality, and disability-adjusted life years (DALY) rates per 100,000 persons for stroke by US states in 1990 and 2017, and the percentage change between 1990 and 2017

**eTable 2.** Age-adjusted incidence, prevalence, mortality, and disability-adjusted life years (DALY) rates per 100,000 persons for Alzheimer’s disease and other dementias by US states in 1990 and 2017, and the percentage change between 1990 and 2017

**eTable 3.** Age-adjusted incidence, prevalence, mortality, and disability-adjusted life years (DALY) rates per 100,000 for Parkinson’s disease by US states in 1990 and 2017, and the percentage change between 1990 and 2017

**eTable 4.** Age-adjusted incidence, prevalence, mortality, and disability-adjusted life years (DALY) rates per 100,000 for epilepsy by US states in 1990 and 2017, and the percentage change between 1990 and 2017

**eTable 5.** Age-adjusted incidence, prevalence, mortality, and disability-adjusted life years (DALY) rates per 100,000 for multiple sclerosis by US states in 1990 and 2017, and the percentage change between 1990 and 2017

**eTable 6.** Age-adjusted incidence, prevalence, mortality and disability-adjusted life years (DALY) rates per 100,000 for motor neuron disease by US states in 1990 and 2017, and the percentage change between 1990 and 2017

**eTable 7.** Age-adjusted incidence, prevalence, mortality, and disability-adjusted life years (DALY) rates per 100,000 for migraine by US states in 1990 and 2017, and the percentage change between 1990 and 2017

**eTable 8.** Age-adjusted incidence, prevalence, mortality, and disability-adjusted life years (DALY) rates per 100,000 for tension-type headache by US states in 1990 and 2017, and the percentage change between 1990 and 2017

**eTable 9.** Age-adjusted incidence, prevalence, mortality, and disability-adjusted life years (DALY) rates per 100,000 for traumatic brain injury by US states in 1990 and 2017, and the percentage change between 1990 and 2017

**eTable 10.** Age-adjusted incidence, prevalence, mortality, and disability-adjusted life years (DALY) rates per 100,000 for spinal cord injuries by US states in 1990 and 2017, and the percentage change between 1990 and 2017

**eTable 11.** Age-adjusted incidence, prevalence, mortality, and disability-adjusted life years (DALY) rates per 100,000 for brain and nervous system cancer by US states in 1990 and 2017, and the percentage change between 1990 and 2017

**eTable 12.** Age-adjusted incidence, prevalence, mortality, and disability-adjusted life years (DALY) rates per 100,000 for meningitis by US states in 1990 and 2017, and the percentage change between 1990 and 2017

**eTable 13.** Age-adjusted incidence, prevalence, mortality, and disability-adjusted life years (DALY) rates per 100,000 for encephalitis by US states in 1990 and 2017, and the percentage change between 1990 and 2017

This supplemental material has been provided by the authors to give readers additional information about their work.

eFigure. Age-standardized incidence, prevalence, mortality, and DALY rates per 100,000 persons for neurological disorders in the US states in 2017

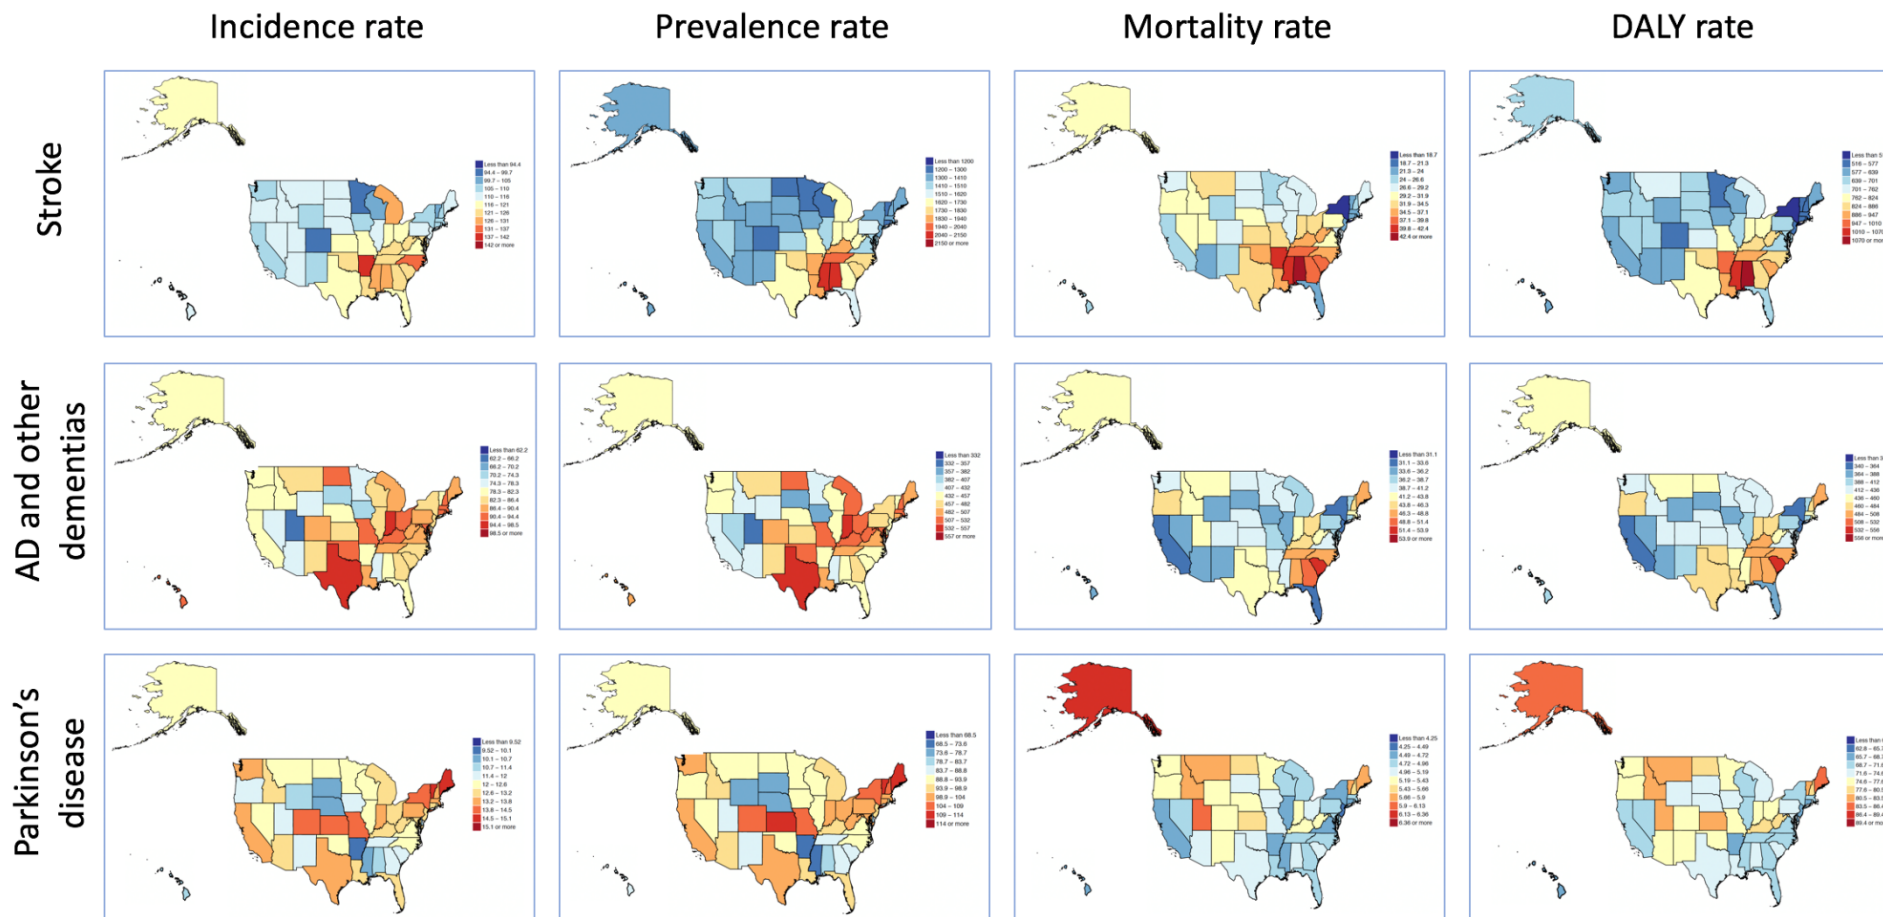

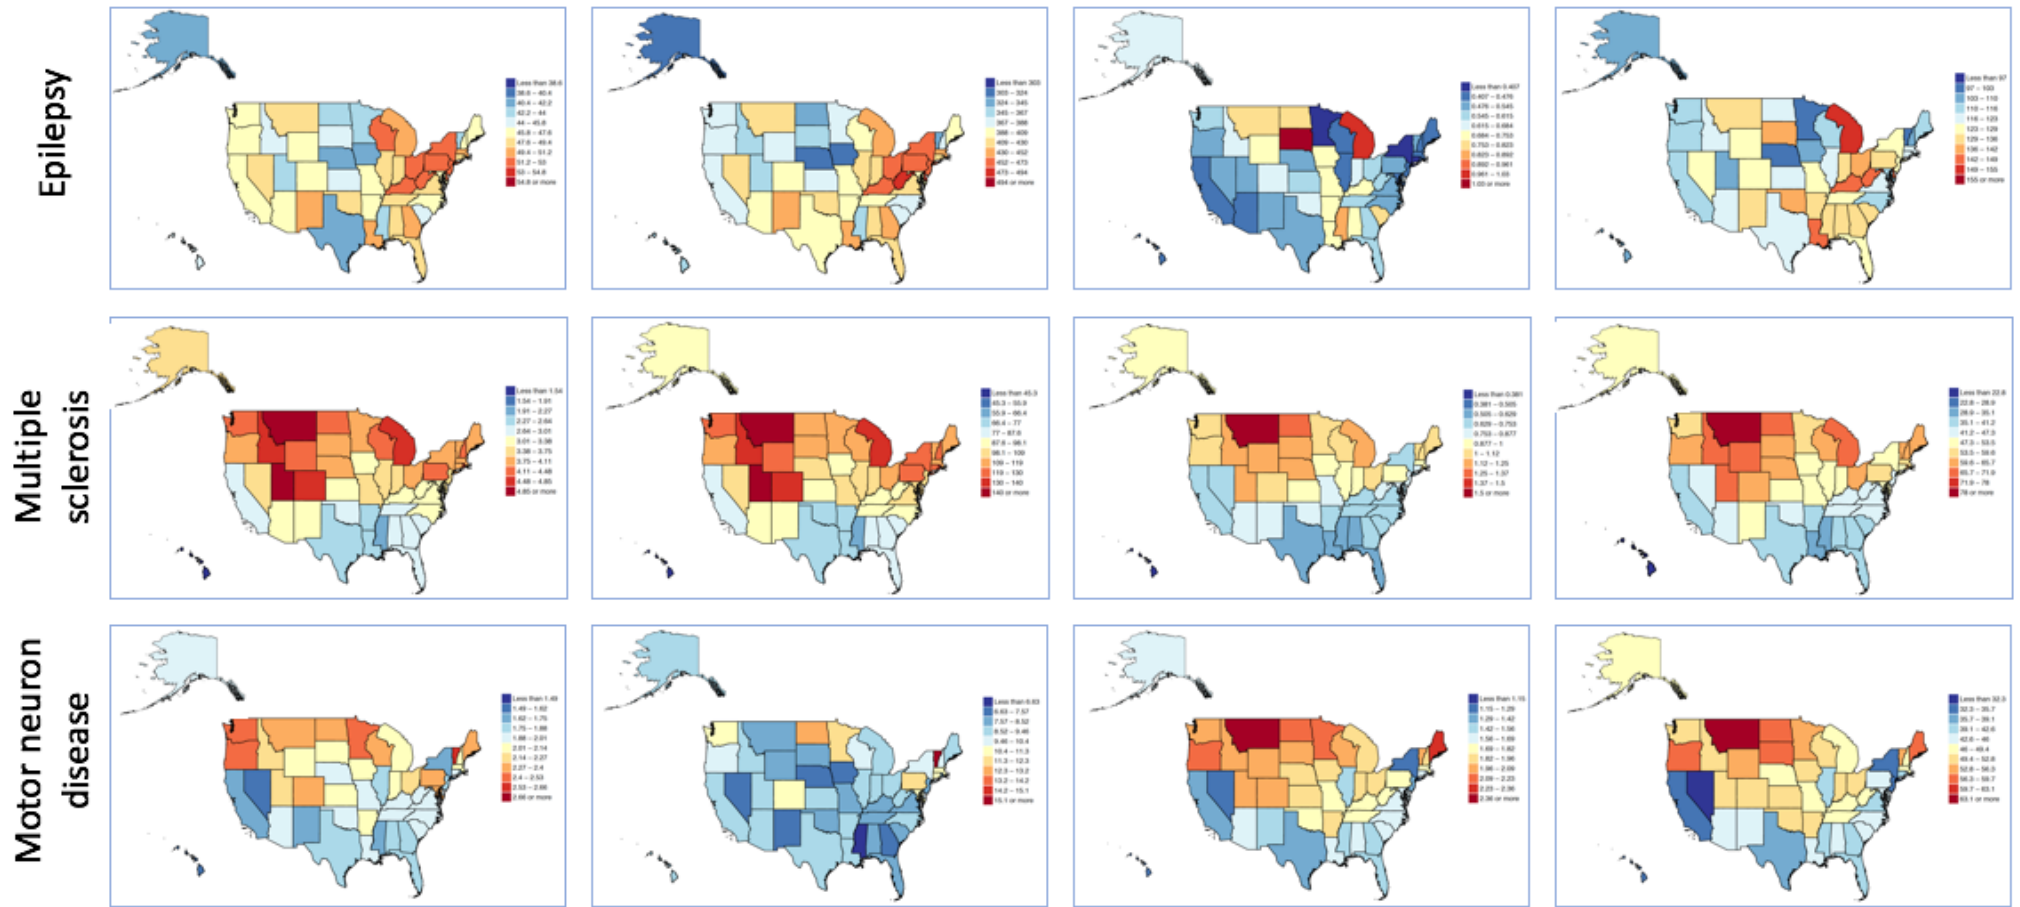

Migraine

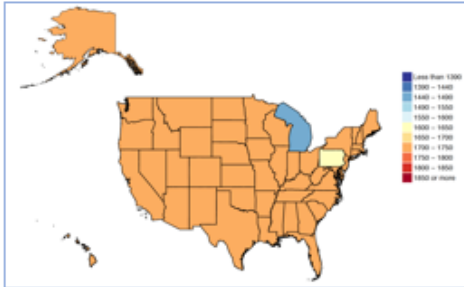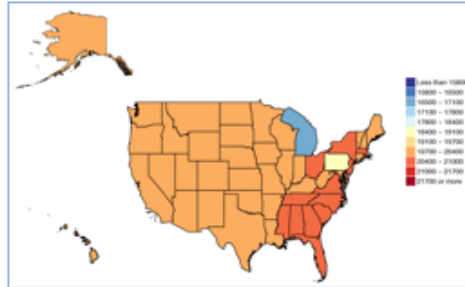

NA

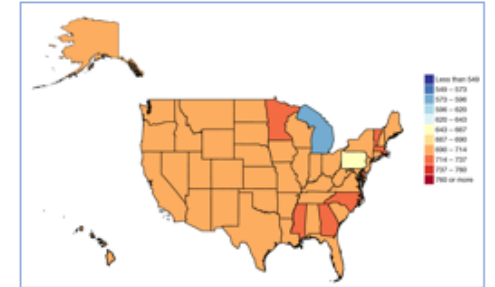

Tension-type headache

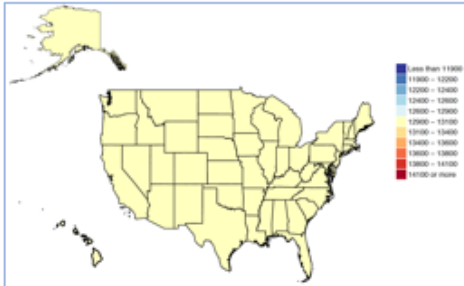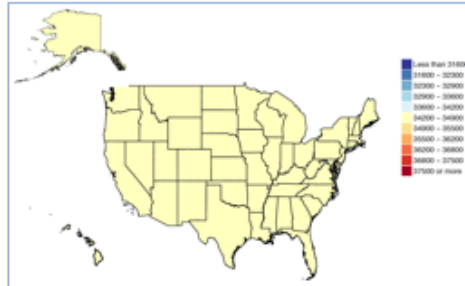

NA

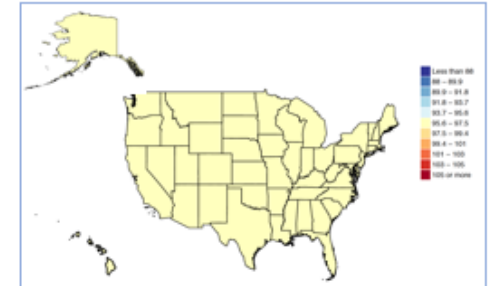

Meningitis

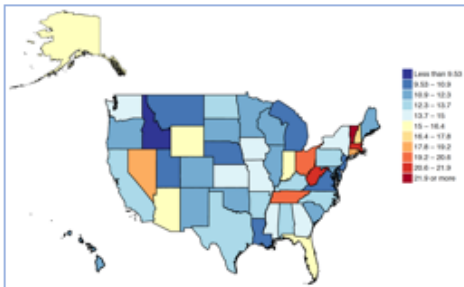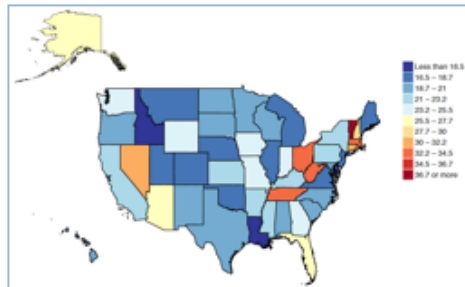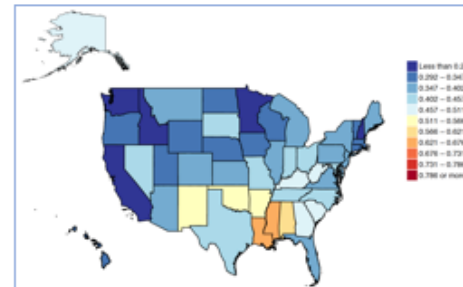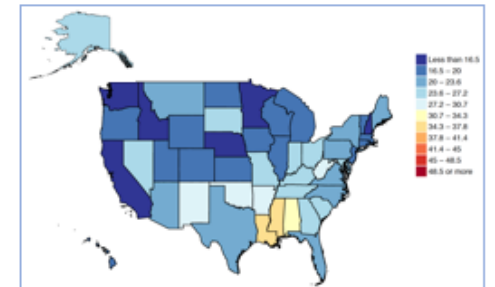

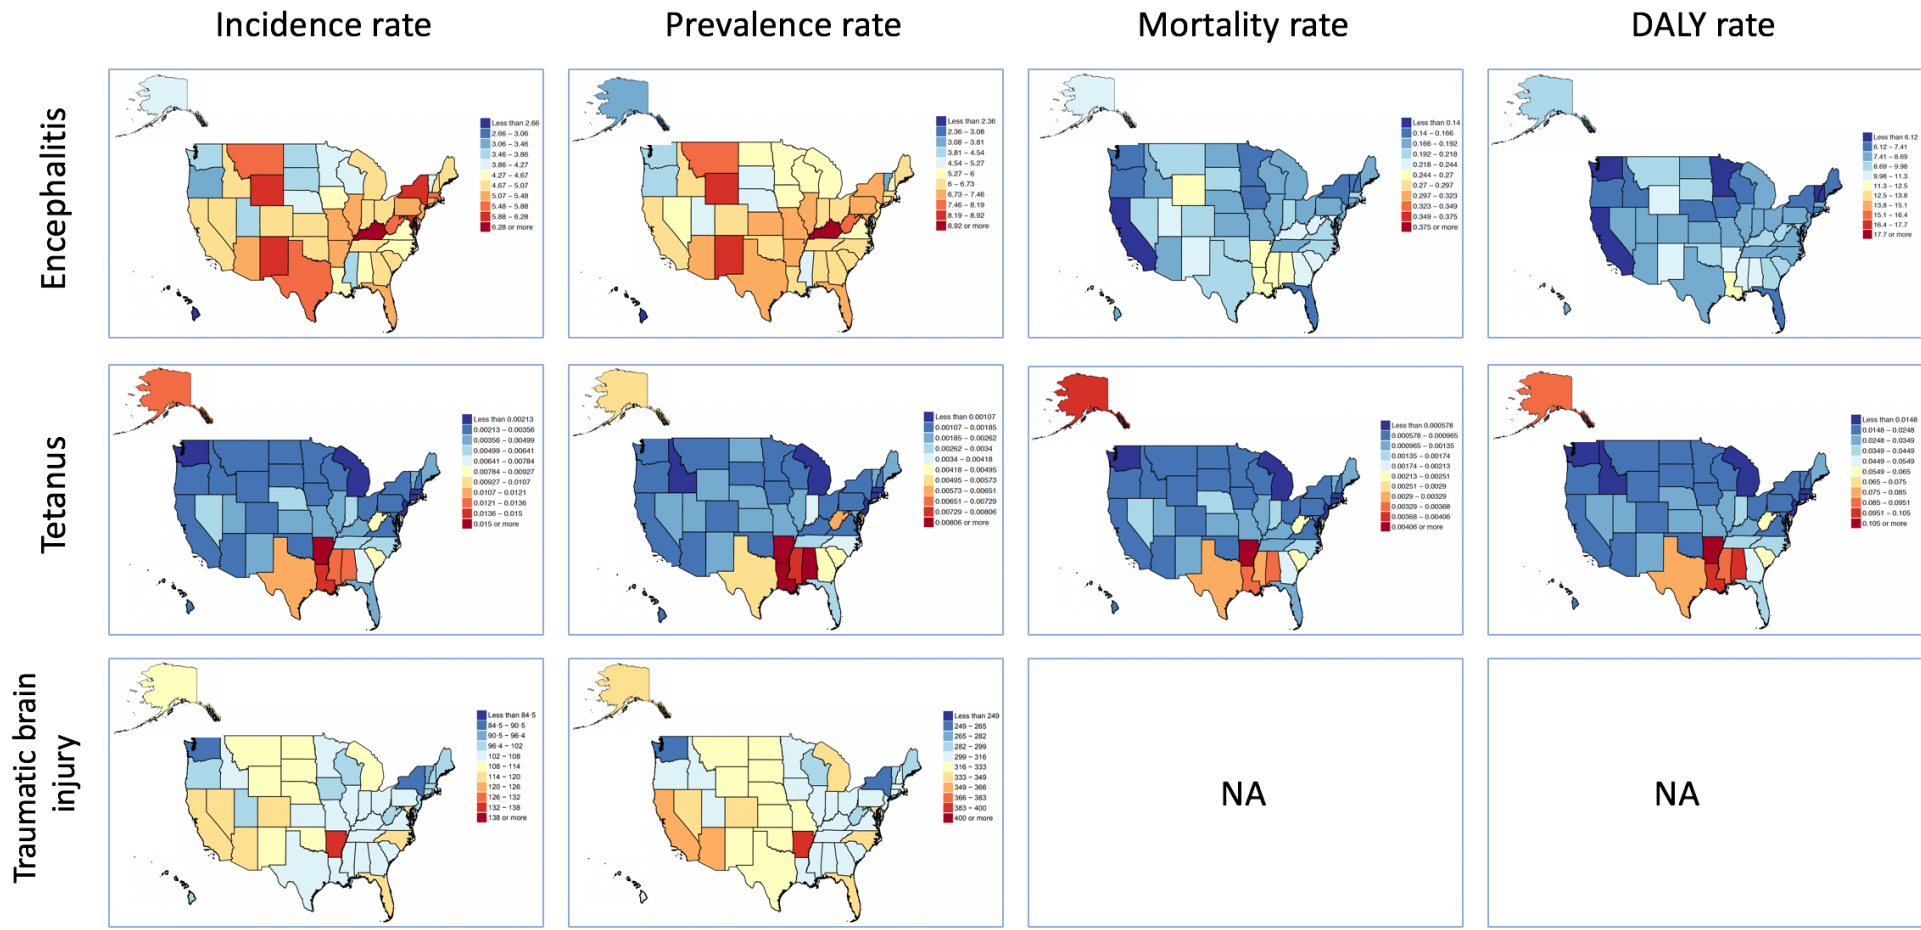

## eAppendix.

### Stroke and Alzheimer's disease and other dementias

Almost all age-standardized metrics for stroke and Alzheimer's disease and other dementias were highest in the Southeastern states and lowest in the Northern and Western states (Figure 1). For stroke, the highest incidence rate in 2017 was in Arkansas (137 per 100,000 [95% UI 126–149]), and the lowest in Colorado (99 per 100,000 [92–107]). Similarly, the highest (2,133 [2,015–2,268]) and lowest (1,211 [1,135–1,295]) prevalence was in Alabama and Wisconsin, respectively; the highest mortality and DALY rates were in Alabama (43 [39–48] and 1,082 [961–1,208], respectively) and the lowest in New York (18 [16–20] and 504 [438–566], respectively). For Alzheimer's disease and other dementias, the highest incidence and prevalence rates were in Indiana (96 [88–105] and 547 [498–604]) and the lowest in Utah (65 [58–72] and 342 [309–377]); the highest mortality rates were in in South Carolina (53 [49–58]) and the lowest in New York (32 [29–35]). Finally, the highest DALY rate was in in South Carolina (545 [497–598]) and the lowest in California (351 [319–382]).

### Parkinson's disease

Age-standardized incidence and prevalence rates of PD were highest in Eastern and Central states, particularly in Vermont (15 [95% UI 13–17] and 112 [97–126]) and lowest in Arkansas (10 [9–11] and 71 [61–80]); while the highest mortality and DALY rates were in Northern states, especially in Alaska (6 [4–7] and 86 [66–95]) and the lowest were in New Jersey and Hawaii (range 4–5 [range 3–5] and 66 [range 51–76]).

### Idiopathic epilepsy

The largest burden of idiopathic epilepsy was observed in Eastern states. The age-standardized incidence rate of epilepsy was highest in Delaware (52 [95% UI 15–83]), and the lowest in Texas (41 [11–65]); the highest and lowest prevalence rates were in West Virginia (484 [142–758]) and Iowa (313 [94–481]), respectively. The highest and lowest

mortality rates were in South Dakota (1 [1–1]) and Connecticut (0 [0–0]); the highest DALY rate was in Michigan (152 [70–288]) and the lowest in Vermont (101 [38–209]).

### Multiple sclerosis

The burden of MS was particularly high in Northern states (except for Alaska). Age-standardized incidence and mortality rates of multiple sclerosis ranged from 1–5 to 0–2 per 100,000 people, respectively, across all US states; prevalence rates were highest in Utah (147 [95% UI 138–157]) and lowest in Hawaii (39 [36–42]); the highest DALY rate was in Montana (82 [53–102]) and the lowest in Hawaii (19 [14–27]).

### Motor neuron disease

Very low age-standardized incidence, prevalence, and mortality rates were observed across all US states for MND (2–3, 6–15, and 1–2, respectively); DALY rates were highest in Montana (63 [95% UI 54–72]) and lowest in Nevada (32 [28–36]).

### Migraine and tension-type headache

Age-standardized incidence, prevalence, and DALY rates of migraine and TTH were evenly distributed across all US states, except for a few Eastern states where the rates for migraine were noticeably greater. The highest incidence, prevalence, and DALY rates of migraine were observed in the District of Columbia (1,756 [95% UI 1,613–1,899], 20,644 [19,098–22,227], and 726 [462–1,051]) and the lowest in Michigan (1,488 [1,337–1,646], 16,862 [15,259–18,507], and 584 [367–860], respectively). The District of Columbia had the highest incidence and prevalence of TTH (13,021 [11,617–14,431] and 34,665 [31,361–38,129]), and Maryland had the lowest (12,975 [11,526–14,352] and 34,412 [31,086–38,237]). While DALY rates of TTH were also highest in the District of Columbia (97 [55–154]), they were lowest in West Virginia (96 [54–154]).

### Traumatic brain and spinal cord injuries

TBI (and to a lesser extent, SCI) age-standardized incidence and prevalence rates were relatively evenly distributed across US states. Arkansas had the highest incidence and prevalence rates of TBI (354 [95% UI 297–421] and 618 [589–647]). The lowest incidence of TBI was in New York (245 [205–294]), and the lowest prevalence of TBI was in Washington (417 [398–437]). Alaska demonstrated the highest incidence and prevalence of SCI (26 [21–33] and 672 [620–728], respectively). Hawaii showed the lowest incidence of SCI (19 [15–24]), and Tennessee had the lowest prevalence of SCI (492 [453–532]).

### Brain and other nervous system cancers

There was relatively low variation in the age-standardized incidence and prevalence of brain and other nervous system cancers across the US states, with somewhat higher rates in North Dakota (10 [95% UI 8–12] and 49 [37–61], respectively) and lower rates in Nevada and Mississippi (6 [5–8] and 25 [19–31], respectively). Mortality and DALY rates from brain and other nervous system cancers were relatively high in North and South Dakota (5 [4–6] and 163 [120–192], respectively) and relatively low in New Mexico (3 [3–4] for mortality) and New York (105 [91–141] for DALYs).

### Meningitis, encephalitis, and tetanus

Most of the age-standardized burden from meningitis, encephalitis, and tetanus was located in the Eastern and Southern states (except incidence and prevalence rates from encephalitis, which were also high in Northern and South-central states). The highest incidence and prevalence rates of meningitis were observed in Vermont (22 [95% UI 20–26] and 37 [33–43]), and the lowest in Idaho (9 [8–10] and 16 [14–18], respectively). The District of Columbia showed the highest mortality and DALY rates of meningitis (1 [1–1] and 51 [38–64], respectively), while Minnesota showed the lowest mortality rate (0 [0–0]) and Idaho



showed the lowest DALY rate (14 [12–22]) from this disease. The highest incidence and prevalence rates of encephalitis were observed in Kentucky (6 [6–7] and 9 [5–15], respectively). While mortality from encephalitis was virtually zero across all US states, the highest DALY rate of this disease was observed in the District of Columbia (18 [10–23]) and the lowest in Washington (6 [5–9]).

#### Between-state variations in the burden of neurological conditions

As shown in the Figures and Supplementary Tables 1-13, age-standardized rates of neurological disorders varied widely between the US states. Between-state incidence rates (per 100,000 people) varied from a 1.4-fold difference for SCI to 3.2-fold and 7.1-fold for MS and tetanus, respectively. For prevalence, the lowest between-state variations were for TTH (1.2-fold difference) and the highest for encephalitis and tetanus (3.8-fold and 7.5-fold, respectively). Mortality rates varied from a 1.5-fold difference for PD to 3.9-fold and 7.0-fold for MS and tetanus, respectively. Lowest variations in DALY rates were observed for TTH (1.2-fold difference), and highest variations for MS and tetanus (3.4-fold and 7.1-fold differences, respectively).

eTable 1. Age-adjusted incidence, prevalence, mortality, and disability-adjusted life years (DALY) rates per 100,000 persons for stroke by US states in 1990 and 2017, and the percentage change between 1990 and 2017

| Location             | Incidence rates (95% UI) |               |        |      | Prevalence (95% UI) |                  |        |      | Mortality rates (95% UI) |            |        |      | DALY rates (95% UI) |                 |        |      |
|----------------------|--------------------------|---------------|--------|------|---------------------|------------------|--------|------|--------------------------|------------|--------|------|---------------------|-----------------|--------|------|
|                      | 1990                     | 2017          | Change | Rank | 1990                | 2017             | Change | Rank | 1990                     | 2017       | Change | Rank | 1990                | 2017            | Change | Rank |
| Alabama              | 150 (140,161)            | 129 (119,140) | -13.8  | 40   | 1839 (1728,1947)    | 2133 (2015,2268) | 16     | 50   | 53 (51,55)               | 43 (39,48) | -18.5  | 47   | 1191 (1105,1276)    | 1082 (961,1208) | -9.2   | 49   |
| Alaska               | 143 (133,155)            | 116 (106,127) | -19.2  | 16   | 1442 (1353,1538)    | 1351 (1268,1445) | -6.3   | 11   | 54 (51,56)               | 31 (29,34) | -41.9  | 3    | 958 (890,1030)      | 682 (610,755)   | -28.9  | 12   |
| Arizona              | 131 (121,141)            | 113 (105,122) | -13.4  | 43   | 1423 (1332,1516)    | 1377 (1299,1459) | -3.2   | 21   | 37 (35,38)               | 23 (21,26) | -36.3  | 14   | 773 (709,834)       | 580 (511,648)   | -25    | 22   |
| Arkansas             | 155 (144,166)            | 137 (126,149) | -11.1  | 48   | 1781 (1679,1882)    | 1917 (1812,2037) | 7.6    | 43   | 53 (51,55)               | 40 (36,44) | -24.9  | 39   | 1154 (1071,1236)    | 983 (870,1097)  | -14.8  | 42   |
| California           | 132 (122,142)            | 110 (102,121) | -16.4  | 28   | 1437 (1352,1533)    | 1352 (1282,1433) | -5.9   | 12   | 41 (40,43)               | 24 (22,27) | -41.1  | 6    | 870 (803,936)       | 593 (525,660)   | -31.9  | 5    |
| Colorado             | 123 (113,133)            | 99 (92,107)   | -19.2  | 14   | 1309 (1223,1393)    | 1220 (1157,1287) | -6.8   | 7    | 38 (36,39)               | 27 (24,30) | -28.5  | 30   | 745 (682,804)       | 564 (496,631)   | -24.2  | 27   |
| Connecticut          | 133 (123,144)            | 107 (98,117)  | -19.7  | 11   | 1414 (1323,1507)    | 1226 (1159,1299) | -13.3  | 1    | 36 (34,37)               | 22 (20,25) | -37.8  | 10   | 758 (693,817)       | 519 (450,583)   | -31.5  | 6    |
| Delaware             | 135 (125,146)            | 112 (102,122) | -17.5  | 21   | 1504 (1413,1593)    | 1510 (1422,1611) | 0.4    | 32   | 41 (39,43)               | 27 (25,30) | -32.9  | 25   | 866 (795,934)       | 649 (575,720)   | -25.1  | 21   |
| District of Columbia | 155 (145,167)            | 109 (99,119)  | -30    | 1    | 1747 (1646,1862)    | 1662 (1553,1783) | -4.9   | 16   | 54 (51,59)               | 25 (22,29) | -54.2  | 1    | 1345 (1240,1503)    | 697 (607,800)   | -48.2  | 1    |
| Florida              | 134 (124,145)            | 117 (107,127) | -12.8  | 44   | 1565 (1473,1663)    | 1568 (1483,1660) | 0.2    | 30   | 36 (35,38)               | 24 (21,27) | -34.4  | 19   | 852 (785,918)       | 644 (573,723)   | -24.4  | 26   |
| Georgia              | 156 (145,167)            | 124 (114,135) | -20.7  | 7    | 1713 (1613,1818)    | 1720 (1623,1830) | 0.4    | 31   | 56 (54,58)               | 37 (34,41) | -33.1  | 24   | 1204 (1130,1281)    | 881 (781,985)   | -26.8  | 17   |
| Hawaii               | 142 (132,153)            | 112 (103,123) | -21.2  | 6    | 1444 (1356,1534)    | 1339 (1268,1414) | -7.3   | 6    | 43 (41,44)               | 26 (23,28) | -40.4  | 8    | 909 (843,974)       | 631 (561,705)   | -30.6  | 7    |
| Idaho                | 137 (127,148)            | 113 (103,122) | -17.8  | 18   | 1458 (1371,1554)    | 1372 (1289,1463) | -5.9   | 13   | 43 (41,45)               | 30 (27,33) | -30.2  | 27   | 835 (772,903)       | 640 (565,709)   | -23.4  | 28   |
| Illinois             | 142 (132,153)            | 114 (105,125) | -19.7  | 12   | 1565 (1474,1662)    | 1492 (1403,1585) | -4.7   | 17   | 42 (40,43)               | 29 (26,32) | -31.3  | 26   | 930 (859,997)       | 673 (589,755)   | -27.6  | 15   |
| Indiana              | 143 (133,154)            | 118 (108,128) | -17.6  | 20   | 1587 (1494,1693)    | 1654 (1566,1754) | 4.2    | 40   | 45 (44,47)               | 33 (30,37) | -26.8  | 34   | 945 (875,1015)      | 782 (695,878)   | -17.2  | 38   |
| Iowa                 | 125 (116,136)            | 108 (101,117) | -13.6  | 41   | 1361 (1277,1445)    | 1319 (1248,1401) | -3.1   | 22   | 37 (35,38)               | 27 (24,30) | -26.8  | 35   | 744 (683,806)       | 607 (531,681)   | -18.4  | 37   |
| Kansas               | 135 (125,145)            | 116 (107,127) | -13.6  | 42   | 1476 (1391,1572)    | 1509 (1428,1596) | 2.3    | 36   | 38 (37,40)               | 33 (29,36) | -14.5  | 49   | 805 (734,869)       | 727 (636,809)   | -9.7   | 48   |
| Kentucky             | 141 (131,153)            | 123 (113,134) | -12.7  | 45   | 1691 (1586,1796)    | 1916 (1806,2048) | 13.3   | 48   | 46 (44,48)               | 37 (33,41) | -20.2  | 44   | 989 (917,1062)      | 876 (771,977)   | -11.5  | 44   |
| Louisiana            | 145 (136,156)            | 121 (111,131) | -16.8  | 24   | 1718 (1621,1829)    | 1917 (1807,2043) | 11.6   | 47   | 49 (47,51)               | 35 (32,40) | -27.1  | 32   | 1127 (1045,1202)    | 917 (815,1026)  | -18.6  | 36   |
| Maine                | 131 (122,142)            | 110 (101,121) | -16    | 31   | 1395 (1307,1482)    | 1334 (1259,1416) | -4.4   | 19   | 38 (36,39)               | 28 (26,31) | -24.9  | 38   | 769 (705,832)       | 622 (548,695)   | -19.1  | 35   |
| Maryland             | 139 (129,150)            | 125 (116,135) | -10.4  | 49   | 1536 (1445,1631)    | 1511 (1430,1593) | -1.6   | 26   | 42 (40,44)               | 28 (25,31) | -34.3  | 21   | 906 (831,976)       | 672 (593,755)   | -25.8  | 20   |
| Massachusetts        | 131 (122,142)            | 106 (97,116)  | -19.2  | 15   | 1437 (1352,1527)    | 1372 (1287,1463) | -4.5   | 18   | 36 (34,37)               | 23 (21,26) | -34.1  | 22   | 759 (693,820)       | 556 (487,625)   | -26.7  | 18   |
| Michigan             | 145 (135,157)            | 127 (116,138) | -12.6  | 46   | 1686 (1578,1787)    | 1717 (1626,1823) | 1.8    | 35   | 41 (40,43)               | 29 (26,32) | -29.3  | 28   | 929 (856,1001)      | 720 (629,814)   | -22.5  | 29   |
| Minnesota            | 125 (116,136)            | 99 (91,109)   | -20.6  | 9    | 1331 (1247,1422)    | 1233 (1159,1309) | -7.4   | 5    | 41 (40,43)               | 25 (23,28) | -38.3  | 9    | 786 (725,850)       | 558 (491,627)   | -29.1  | 11   |
| Mississippi          | 150 (140,161)            | 128 (118,139) | -14.7  | 36   | 1809 (1706,1915)    | 2097 (1984,2223) | 15.9   | 49   | 51 (49,53)               | 41 (37,47) | -19.2  | 45   | 1198 (1112,1284)    | 1067 (947,1191) | -11    | 45   |
| Missouri             | 138 (128,148)            | 118 (108,128) | -14.3  | 38   | 1565 (1473,1660)    | 1636 (1538,1744) | 4.6    | 41   | 42 (40,43)               | 33 (30,36) | -20.8  | 43   | 907 (834,978)       | 774 (682,867)   | -14.6  | 43   |
| Montana              | 133 (124,145)            | 114 (105,124) | -14.6  | 37   | 1432 (1346,1516)    | 1449 (1366,1539) | 1.2    | 34   | 42 (40,44)               | 33 (30,36) | -21.9  | 42   | 830 (762,895)       | 702 (626,788)   | -15.3  | 41   |
| Nebraska             | 135 (126,146)            | 113 (104,123) | -16.4  | 30   | 1419 (1329,1505)    | 1326 (1253,1404) | -6.6   | 9    | 40 (38,42)               | 29 (27,33) | -26.4  | 37   | 820 (757,887)       | 646 (571,723)   | -21.2  | 30   |

|                |               |               |       |    |                  |                  |      |    |            |            |       |    |                  |                |       |    |
|----------------|---------------|---------------|-------|----|------------------|------------------|------|----|------------|------------|-------|----|------------------|----------------|-------|----|
| Nevada         | 133 (123,144) | 113 (104,122) | -15.5 | 33 | 1462 (1373,1551) | 1455 (1371,1551) | -0.5 | 28 | 45 (43,48) | 30 (27,33) | -34.5 | 18 | 919 (851,991)    | 693 (616,771)  | -24.6 | 25 |
| New Hampshire  | 135 (125,145) | 107 (98,117)  | -20.6 | 8  | 1485 (1393,1572) | 1384 (1303,1476) | -6.8 | 8  | 40 (38,41) | 25 (23,27) | -37.6 | 11 | 799 (731,867)    | 565 (494,640)  | -29.3 | 10 |
| New Jersey     | 132 (122,143) | 112 (102,123) | -15.3 | 35 | 1469 (1381,1561) | 1373 (1302,1459) | -6.5 | 10 | 37 (36,39) | 22 (19,24) | -41.8 | 4  | 839 (774,903)    | 558 (488,629)  | -33.4 | 3  |
| New Mexico     | 132 (122,142) | 109 (100,119) | -17.6 | 19 | 1413 (1324,1504) | 1390 (1309,1470) | -1.6 | 25 | 39 (37,40) | 25 (23,27) | -35.9 | 15 | 798 (733,859)    | 599 (527,669)  | -24.9 | 23 |
| New York       | 126 (116,137) | 105 (98,115)  | -16.5 | 27 | 1457 (1365,1554) | 1376 (1295,1464) | -5.6 | 14 | 36 (35,37) | 18 (16,20) | -50   | 2  | 826 (758,887)    | 504 (438,566)  | -38.9 | 2  |
| North Carolina | 158 (147,170) | 134 (123,145) | -15.3 | 34 | 1755 (1653,1865) | 1799 (1702,1904) | 2.5  | 38 | 53 (51,55) | 35 (32,39) | -33.6 | 23 | 1129 (1050,1207) | 828 (736,925)  | -26.6 | 19 |
| North Dakota   | 135 (125,146) | 113 (104,122) | -16.4 | 29 | 1363 (1282,1445) | 1293 (1220,1373) | -5.2 | 15 | 40 (38,42) | 29 (27,31) | -27.8 | 31 | 796 (732,860)    | 662 (595,730)  | -16.9 | 39 |
| Ohio           | 136 (126,147) | 117 (108,127) | -13.8 | 39 | 1573 (1480,1669) | 1674 (1579,1775) | 6.4  | 42 | 40 (39,42) | 34 (30,37) | -16.3 | 48 | 883 (811,950)    | 789 (697,878)  | -10.6 | 46 |
| Oklahoma       | 139 (129,150) | 123 (113,133) | -12.1 | 47 | 1597 (1505,1695) | 1737 (1643,1846) | 8.8  | 44 | 45 (43,46) | 36 (32,40) | -19.1 | 46 | 963 (889,1032)   | 867 (770,966)  | -10   | 47 |
| Oregon         | 142 (132,153) | 111 (102,122) | -21.7 | 3  | 1484 (1396,1572) | 1458 (1370,1550) | -1.7 | 24 | 46 (44,48) | 30 (27,33) | -34.7 | 17 | 880 (814,945)    | 662 (580,745)  | -24.8 | 24 |
| Pennsylvania   | 138 (128,149) | 114 (105,124) | -17.2 | 23 | 1545 (1452,1644) | 1558 (1471,1653) | 0.8  | 33 | 39 (38,41) | 30 (27,33) | -24.8 | 40 | 869 (799,938)    | 697 (618,782)  | -19.8 | 33 |
| Rhode Island   | 131 (121,142) | 106 (97,116)  | -19.4 | 13 | 1442 (1351,1535) | 1330 (1255,1414) | -7.8 | 4  | 36 (34,37) | 21 (19,24) | -40.5 | 7  | 773 (705,840)    | 536 (469,600)  | -30.6 | 8  |
| South Carolina | 161 (150,173) | 125 (115,136) | -22.4 | 2  | 1748 (1644,1850) | 1794 (1692,1901) | 2.6  | 39 | 60 (58,63) | 40 (36,44) | -34.4 | 20 | 1317 (1234,1401) | 939 (835,1047) | -28.7 | 13 |
| South Dakota   | 132 (122,142) | 111 (102,121) | -15.9 | 32 | 1401 (1312,1489) | 1369 (1291,1453) | -2.3 | 23 | 38 (36,39) | 29 (27,32) | -22.6 | 41 | 789 (726,852)    | 666 (591,740)  | -15.6 | 40 |
| Tennessee      | 152 (142,163) | 123 (114,135) | -18.9 | 17 | 1785 (1683,1894) | 1946 (1835,2071) | 9    | 45 | 53 (51,55) | 38 (34,42) | -28.8 | 29 | 1134 (1048,1214) | 911 (810,1022) | -19.7 | 34 |
| Texas          | 141 (130,152) | 116 (107,127) | -17.4 | 22 | 1587 (1493,1682) | 1625 (1536,1722) | 2.4  | 37 | 45 (43,46) | 32 (29,36) | -27   | 33 | 960 (888,1028)   | 767 (682,851)  | -20.1 | 31 |
| Utah           | 135 (124,146) | 112 (103,122) | -16.7 | 25 | 1405 (1320,1495) | 1387 (1312,1470) | -1.3 | 27 | 43 (41,45) | 32 (29,35) | -26.6 | 36 | 820 (756,881)    | 657 (588,729)  | -19.9 | 32 |
| Vermont        | 132 (122,143) | 104 (96,115)  | -21.2 | 5  | 1393 (1309,1480) | 1284 (1212,1365) | -7.8 | 3  | 39 (38,41) | 23 (21,25) | -41.7 | 5  | 778 (713,844)    | 519 (458,578)  | -33.2 | 4  |
| Virginia       | 148 (138,159) | 116 (107,127) | -21.6 | 4  | 1568 (1471,1669) | 1505 (1424,1595) | -4   | 20 | 49 (47,50) | 31 (27,34) | -37.1 | 12 | 994 (920,1065)   | 699 (615,779)  | -29.7 | 9  |
| Washington     | 131 (121,142) | 109 (102,118) | -16.5 | 26 | 1425 (1341,1512) | 1423 (1348,1508) | -0.1 | 29 | 43 (41,45) | 27 (24,30) | -36.7 | 13 | 831 (765,894)    | 606 (530,685)  | -27.1 | 16 |
| West Virginia  | 135 (125,145) | 121 (111,133) | -10.3 | 50 | 1572 (1480,1668) | 1722 (1623,1835) | 9.6  | 46 | 41 (39,42) | 36 (32,40) | -11.8 | 50 | 907 (837,979)    | 841 (749,934)  | -7.3  | 50 |
| Wisconsin      | 128 (118,139) | 103 (95,111)  | -19.8 | 10 | 1338 (1252,1430) | 1211 (1135,1295) | -9.5 | 2  | 41 (40,43) | 27 (24,30) | -35.8 | 16 | 817 (754,875)    | 584 (514,655)  | -28.6 | 14 |

eTable 2. Age-adjusted incidence, prevalence, mortality, and disability-adjusted life years (DALY) rates per 100,000 persons for Alzheimer's disease and other dementias by US states in 1990 and 2017, and the percentage change between 1990 and 2017

| Location             | Incidence rates (95% UI) |             |        |      | Prevalence (95% UI) |               |        |      | Mortality rates (95% UI) |            |        |      | DALY rates (95% UI) |               |        |      |
|----------------------|--------------------------|-------------|--------|------|---------------------|---------------|--------|------|--------------------------|------------|--------|------|---------------------|---------------|--------|------|
|                      | 1990                     | 2017        | Change | Rank | 1990                | 2017          | Change | Rank | 1990                     | 2017       | Change | Rank | 1990                | 2017          | Change | Rank |
| Alabama              | 96 (84,110)              | 80 (73,88)  | -17.1  | 9    | 534 (456,618)       | 446 (407,491) | -16.5  | 17   | 35 (34,36)               | 47 (43,51) | 33.7   | 47   | 419 (393,445)       | 504 (457,550) | 20.4   | 49   |
| Alaska               | 95 (82,110)              | 81 (74,89)  | -14.6  | 19   | 530 (449,617)       | 445 (402,491) | -16.1  | 19   | 50 (48,51)               | 43 (40,46) | -13.5  | 1    | 514 (485,544)       | 450 (420,481) | -12.3  | 1    |
| Arizona              | 95 (82,109)              | 78 (71,86)  | -17.3  | 8    | 527 (449,612)       | 429 (393,470) | -18.5  | 9    | 35 (34,36)               | 35 (32,38) | 0.7    | 9    | 404 (379,433)       | 385 (351,423) | -4.8   | 13   |
| Arkansas             | 96 (83,113)              | 80 (72,88)  | -17    | 11   | 532 (448,624)       | 435 (396,479) | -18.4  | 11   | 35 (34,36)               | 41 (38,45) | 17.8   | 35   | 415 (389,444)       | 452 (409,495) | 8.8    | 37   |
| California           | 93 (80,108)              | 79 (72,87)  | -15    | 18   | 512 (437,606)       | 423 (384,465) | -17.4  | 13   | 34 (33,34)               | 32 (30,35) | -3.7   | 4    | 392 (367,420)       | 351 (319,382) | -10.5  | 4    |
| Colorado             | 99 (86,112)              | 89 (81,98)  | -9.2   | 35   | 555 (480,638)       | 495 (450,544) | -10.9  | 30   | 37 (35,37)               | 41 (37,45) | 11.8   | 26   | 423 (396,451)       | 428 (383,469) | 1.3    | 24   |
| Connecticut          | 99 (87,112)              | 91 (83,100) | -7.4   | 42   | 554 (481,633)       | 506 (460,556) | -8.7   | 39   | 36 (35,37)               | 37 (33,40) | 2      | 14   | 419 (391,447)       | 401 (361,443) | -4.4   | 14   |
| Delaware             | 97 (84,112)              | 81 (74,89)  | -16.5  | 12   | 539 (460,630)       | 439 (399,480) | -18.5  | 10   | 38 (37,39)               | 38 (36,41) | 1.5    | 13   | 433 (406,462)       | 407 (378,438) | -5.9   | 10   |
| District of Columbia | 102 (90,116)             | 96 (87,105) | -6.4   | 47   | 577 (499,660)       | 538 (488,596) | -6.7   | 45   | 39 (38,40)               | 39 (37,42) | 0.1    | 7    | 482 (454,512)       | 452 (413,493) | -6.3   | 7    |
| Florida              | 96 (83,110)              | 81 (73,89)  | -15.9  | 14   | 536 (460,625)       | 444 (405,488) | -17.2  | 14   | 32 (31,33)               | 32 (30,35) | 1.3    | 11   | 389 (363,417)       | 370 (336,404) | -4.9   | 12   |
| Georgia              | 97 (85,110)              | 83 (76,92)  | -14.1  | 21   | 537 (461,618)       | 461 (419,508) | -14.2  | 26   | 37 (36,37)               | 49 (45,54) | 34.8   | 49   | 427 (402,455)       | 505 (461,553) | 18.2   | 47   |
| Hawaii               | 98 (86,110)              | 91 (82,99)  | -7.4   | 43   | 556 (483,632)       | 506 (460,556) | -9     | 38   | 36 (35,36)               | 36 (33,39) | 1.2    | 10   | 415 (389,444)       | 401 (366,440) | -3.4   | 16   |
| Idaho                | 95 (83,108)              | 78 (71,86)  | -17.3  | 7    | 528 (453,609)       | 429 (391,471) | -18.7  | 7    | 36 (35,37)               | 42 (39,44) | 15.6   | 29   | 412 (387,441)       | 434 (401,466) | 5.5    | 29   |
| Illinois             | 97 (84,111)              | 83 (76,92)  | -13.7  | 23   | 537 (461,622)       | 454 (414,496) | -15.5  | 22   | 35 (34,36)               | 36 (33,39) | 2.7    | 15   | 414 (388,441)       | 391 (357,430) | -5.5   | 11   |
| Indiana              | 101 (89,115)             | 96 (88,105) | -5.2   | 49   | 571 (494,653)       | 547 (498,604) | -4.1   | 49   | 37 (36,38)               | 43 (40,47) | 16.4   | 32   | 436 (409,464)       | 475 (433,524) | 8.8    | 38   |
| Iowa                 | 93 (79,109)              | 73 (66,81)  | -21.4  | 3    | 508 (424,599)       | 380 (345,417) | -25.3  | 3    | 33 (32,34)               | 35 (32,38) | 4.9    | 18   | 388 (362,417)       | 377 (340,413) | -2.9   | 17   |
| Kansas               | 97 (85,111)              | 85 (78,94)  | -12.2  | 28   | 542 (468,625)       | 469 (428,518) | -13.4  | 28   | 35 (34,36)               | 39 (36,43) | 12     | 27   | 409 (381,438)       | 426 (387,468) | 4.2    | 27   |
| Kentucky             | 100 (88,114)             | 92 (83,100) | -8.7   | 37   | 563 (485,645)       | 518 (473,568) | -7.9   | 41   | 36 (35,37)               | 46 (42,50) | 26.5   | 44   | 433 (407,461)       | 495 (449,541) | 14.2   | 46   |
| Louisiana            | 99 (87,113)              | 89 (80,98)  | -10.9  | 30   | 557 (482,638)       | 498 (450,549) | -10.5  | 32   | 36 (35,37)               | 42 (39,46) | 18.7   | 37   | 428 (402,455)       | 472 (431,519) | 10.3   | 41   |
| Maine                | 99 (87,113)              | 90 (82,99)  | -8.9   | 36   | 556 (479,641)       | 505 (459,555) | -9.2   | 35   | 37 (36,38)               | 47 (43,50) | 26.9   | 45   | 427 (400,455)       | 485 (444,525) | 13.4   | 44   |
| Maryland             | 97 (86,111)              | 91 (83,100) | -6.5   | 46   | 543 (472,619)       | 509 (465,560) | -6.1   | 47   | 37 (36,38)               | 39 (35,42) | 4.1    | 17   | 428 (403,455)       | 420 (383,462) | -1.9   | 18   |
| Massachusetts        | 93 (82,106)              | 92 (83,101) | -1.3   | 50   | 518 (449,593)       | 512 (467,564) | -1.2   | 50   | 35 (33,36)               | 41 (38,45) | 20.1   | 42   | 405 (380,431)       | 447 (407,493) | 10.5   | 43   |
| Michigan             | 100 (88,113)             | 90 (82,99)  | -9.7   | 33   | 561 (487,644)       | 508 (463,557) | -9.4   | 34   | 36 (34,37)               | 38 (34,41) | 5.4    | 19   | 422 (395,450)       | 419 (378,459) | -0.9   | 20   |
| Minnesota            | 96 (83,110)              | 78 (71,85)  | -18.7  | 5    | 533 (456,619)       | 426 (389,466) | -20    | 5    | 36 (35,37)               | 41 (38,45) | 14.3   | 28   | 415 (390,443)       | 422 (383,462) | 1.6    | 25   |
| Mississippi          | 94 (80,110)              | 77 (69,85)  | -18.5  | 6    | 515 (430,605)       | 416 (377,461) | -19.1  | 6    | 34 (33,35)               | 41 (37,45) | 19.7   | 39   | 407 (380,435)       | 444 (404,488) | 9.2    | 40   |
| Missouri             | 100 (88,113)             | 92 (84,101) | -7.4   | 41   | 559 (484,642)       | 517 (471,566) | -7.5   | 42   | 36 (35,37)               | 39 (35,42) | 7.2    | 20   | 426 (399,454)       | 430 (392,472) | 0.8    | 22   |
| Montana              | 97 (85,110)              | 86 (79,95)  | -11.1  | 29   | 544 (473,621)       | 474 (432,523) | -12.8  | 29   | 37 (36,38)               | 44 (41,47) | 17.3   | 34   | 424 (398,451)       | 460 (422,499) | 8.4    | 33   |
| Nebraska             | 95 (82,110)              | 79 (72,87)  | -17    | 10   | 528 (451,616)       | 433 (394,477) | -18.1  | 12   | 36 (34,36)               | 39 (36,43) | 11.1   | 24   | 411 (386,440)       | 423 (387,459) | 2.8    | 26   |

|                |              |             |       |    |               |               |       |    |            |            |      |    |               |               |       |    |
|----------------|--------------|-------------|-------|----|---------------|---------------|-------|----|------------|------------|------|----|---------------|---------------|-------|----|
| Nevada         | 93 (79,112)  | 75 (68,83)  | -19.8 | 4  | 510 (420,613) | 397 (362,440) | -22.2 | 4  | 39 (38,40) | 36 (33,38) | -9.3 | 2  | 426 (401,455) | 375 (347,405) | -12   | 2  |
| New Hampshire  | 101 (89,115) | 94 (86,103) | -6.7  | 45 | 572 (497,655) | 530 (481,581) | -7.5  | 43 | 38 (37,39) | 44 (41,48) | 16.2 | 31 | 441 (414,470) | 467 (429,506) | 5.9   | 30 |
| New Jersey     | 95 (82,111)  | 83 (75,91)  | -13.4 | 25 | 529 (452,616) | 447 (407,492) | -15.4 | 23 | 34 (33,35) | 32 (29,36) | -5.2 | 3  | 403 (378,430) | 359 (325,397) | -10.9 | 3  |
| New Mexico     | 96 (85,110)  | 84 (77,93)  | -12.4 | 27 | 540 (466,621) | 464 (423,509) | -14.1 | 27 | 37 (36,38) | 36 (33,38) | -2.7 | 5  | 422 (397,450) | 396 (364,429) | -6    | 9  |
| New York       | 98 (86,111)  | 85 (78,93)  | -13   | 26 | 547 (472,626) | 468 (429,517) | -14.4 | 25 | 32 (31,32) | 32 (29,35) | 0.5  | 8  | 387 (362,415) | 360 (324,399) | -7    | 6  |
| North Carolina | 98 (86,113)  | 82 (75,91)  | -15.9 | 13 | 551 (471,643) | 449 (409,493) | -18.6 | 8  | 37 (36,38) | 48 (44,52) | 29   | 46 | 434 (408,463) | 493 (450,538) | 13.5  | 45 |
| North Dakota   | 99 (87,113)  | 91 (83,100) | -8.5  | 38 | 564 (487,648) | 512 (464,564) | -9.2  | 37 | 37 (36,38) | 40 (37,43) | 8.6  | 21 | 422 (394,452) | 439 (408,474) | 4.2   | 28 |
| Ohio           | 100 (88,113) | 93 (85,102) | -6.8  | 44 | 563 (489,644) | 527 (481,577) | -6.3  | 46 | 36 (35,37) | 44 (40,48) | 20.2 | 43 | 432 (406,459) | 477 (431,520) | 10.3  | 42 |
| Oklahoma       | 100 (88,113) | 92 (84,101) | -8    | 39 | 560 (482,638) | 518 (473,570) | -7.4  | 44 | 36 (35,37) | 42 (38,46) | 15.7 | 30 | 426 (401,454) | 464 (421,509) | 8.7   | 36 |
| Oregon         | 96 (84,111)  | 81 (74,89)  | -15.4 | 15 | 537 (461,620) | 451 (412,496) | -16   | 20 | 37 (36,38) | 45 (41,49) | 20   | 41 | 424 (397,452) | 461 (418,506) | 8.9   | 39 |
| Pennsylvania   | 100 (88,114) | 87 (79,95)  | -13.6 | 24 | 564 (494,645) | 478 (433,522) | -15.3 | 24 | 36 (35,37) | 36 (33,39) | 1.3  | 12 | 426 (399,455) | 399 (364,436) | -6.2  | 8  |
| Rhode Island   | 102 (90,115) | 94 (86,103) | -7.6  | 40 | 575 (499,655) | 527 (478,578) | -8.4  | 40 | 35 (34,36) | 41 (38,45) | 17.8 | 36 | 421 (395,452) | 447 (411,485) | 6.2   | 31 |
| South Carolina | 97 (85,111)  | 83 (76,91)  | -14.3 | 20 | 541 (463,625) | 457 (414,500) | -15.7 | 21 | 36 (35,37) | 53 (49,58) | 46.4 | 50 | 430 (405,458) | 545 (497,598) | 26.8  | 50 |
| South Dakota   | 92 (78,108)  | 70 (63,78)  | -23.3 | 2  | 502 (417,596) | 371 (333,411) | -26   | 2  | 34 (33,35) | 35 (32,37) | 2.7  | 16 | 385 (360,413) | 370 (343,398) | -4.1  | 15 |
| Tennessee      | 97 (85,112)  | 88 (80,97)  | -9.5  | 34 | 541 (461,627) | 491 (446,541) | -9.2  | 36 | 36 (35,36) | 48 (43,52) | 34.5 | 48 | 423 (399,451) | 504 (458,552) | 19    | 48 |
| Texas          | 100 (88,114) | 95 (87,104) | -5.3  | 48 | 566 (489,645) | 539 (491,591) | -4.7  | 48 | 37 (36,38) | 44 (40,47) | 19   | 38 | 433 (407,461) | 471 (430,513) | 8.7   | 35 |
| Utah           | 88 (75,105)  | 65 (58,72)  | -26.8 | 1  | 480 (398,573) | 342 (309,377) | -28.8 | 1  | 34 (33,35) | 41 (38,44) | 20   | 40 | 388 (365,415) | 422 (388,455) | 8.5   | 34 |
| Vermont        | 95 (82,111)  | 81 (74,89)  | -15.1 | 16 | 529 (449,617) | 438 (399,482) | -17.1 | 15 | 38 (36,39) | 37 (35,40) | -0.9 | 6  | 425 (399,454) | 395 (364,427) | -7    | 5  |
| Virginia       | 99 (87,112)  | 89 (81,98)  | -10.2 | 32 | 556 (483,637) | 496 (452,547) | -10.7 | 31 | 37 (36,38) | 41 (37,44) | 8.9  | 23 | 434 (407,461) | 435 (395,478) | 0.3   | 21 |
| Washington     | 95 (82,110)  | 81 (73,89)  | -15   | 17 | 528 (447,620) | 438 (400,481) | -16.9 | 16 | 37 (36,37) | 41 (37,44) | 11.2 | 25 | 417 (391,445) | 420 (383,460) | 0.8   | 23 |
| West Virginia  | 101 (88,114) | 90 (82,99)  | -10.5 | 31 | 566 (492,648) | 511 (465,562) | -9.7  | 33 | 35 (34,36) | 41 (38,45) | 17.3 | 33 | 424 (396,454) | 456 (417,499) | 7.6   | 32 |
| Wisconsin      | 97 (84,111)  | 83 (76,91)  | -14.1 | 22 | 539 (462,624) | 452 (410,496) | -16.2 | 18 | 36 (36,37) | 40 (36,44) | 8.8  | 22 | 420 (395,448) | 413 (373,454) | -1.6  | 19 |

eTable 3. Age-adjusted incidence, prevalence, mortality, and disability-adjusted life years (DALY) rates per 100,000 for Parkinson's disease by US states in 1990 and 2017, and the percentage change between 1990 and 2017

| Location             | Incidence rates (95% UI) |            |        |      | Prevalence (95% UI) |              |        |      | Mortality rates (95% UI) |         |        |      | DALY rates (95% UI) |            |        |      |
|----------------------|--------------------------|------------|--------|------|---------------------|--------------|--------|------|--------------------------|---------|--------|------|---------------------|------------|--------|------|
|                      | 1990                     | 2017       | Change | Rank | 1990                | 2017         | Change | Rank | 1990                     | 2017    | Change | Rank | 1990                | 2017       | Change | Rank |
| Alabama              | 10 (8,12)                | 11 (9,12)  | 8.7    | 5    | 78 (61,97)          | 80 (69,91)   | 3.7    | 6    | 4 (3,4)                  | 5 (4,6) | 42.6   | 46   | 56 (51,69)          | 74 (64,83) | 32.1   | 44   |
| Alaska               | 11 (9,13)                | 12 (10,14) | 15     | 12   | 83 (67,101)         | 89 (78,100)  | 8      | 8    | 6 (6,6)                  | 6 (4,7) | 3.4    | 1    | 80 (75,87)          | 86 (66,95) | 6.7    | 1    |
| Arizona              | 11 (9,13)                | 13 (11,15) | 19.9   | 28   | 84 (68,104)         | 96 (84,108)  | 14.5   | 29   | 4 (4,4)                  | 5 (4,6) | 35     | 29   | 59 (55,66)          | 75 (58,85) | 27.1   | 32   |
| Arkansas             | 10 (8,12)                | 10 (9,11)  | 2.2    | 3    | 74 (58,94)          | 71 (61,80)   | -4.9   | 2    | 3 (3,4)                  | 5 (4,5) | 33.1   | 22   | 54 (49,65)          | 68 (60,76) | 24.8   | 25   |
| California           | 11 (9,13)                | 13 (12,15) | 24.7   | 40   | 86 (69,105)         | 102 (88,114) | 19     | 40   | 4 (4,4)                  | 5 (4,5) | 26.8   | 11   | 58 (53,66)          | 70 (56,78) | 20     | 11   |
| Colorado             | 11 (9,13)                | 14 (12,16) | 27.2   | 44   | 88 (72,107)         | 107 (93,120) | 21.8   | 45   | 4 (4,4)                  | 5 (4,6) | 36.5   | 34   | 61 (56,68)          | 77 (61,87) | 27.2   | 33   |
| Connecticut          | 11 (9,13)                | 13 (11,15) | 24.2   | 39   | 85 (68,103)         | 100 (87,113) | 18.2   | 38   | 4 (3,4)                  | 5 (4,5) | 25.8   | 8    | 58 (52,68)          | 69 (58,77) | 19     | 8    |
| Delaware             | 10 (8,12)                | 11 (9,13)  | 9.8    | 6    | 78 (62,97)          | 80 (70,91)   | 3.6    | 5    | 4 (4,5)                  | 5 (4,5) | 20.7   | 4    | 61 (56,73)          | 69 (60,75) | 12.9   | 3    |
| District of Columbia | 10 (8,13)                | 13 (11,14) | 22.4   | 32   | 81 (65,101)         | 95 (83,108)  | 17.2   | 32   | 4 (4,5)                  | 5 (4,5) | 14.1   | 2    | 68 (63,81)          | 73 (62,83) | 7.6    | 2    |
| Florida              | 11 (9,13)                | 13 (11,14) | 19.3   | 23   | 84 (68,104)         | 96 (84,108)  | 14.1   | 25   | 4 (3,4)                  | 5 (4,5) | 32.6   | 20   | 57 (52,64)          | 71 (57,79) | 24.3   | 23   |
| Georgia              | 10 (8,12)                | 12 (10,13) | 16.4   | 15   | 78 (62,97)          | 86 (74,97)   | 10.2   | 16   | 4 (3,5)                  | 5 (4,5) | 35.5   | 30   | 57 (52,71)          | 70 (61,79) | 23.7   | 17   |
| Hawaii               | 10 (8,12)                | 11 (10,13) | 18.9   | 22   | 75 (62,92)          | 85 (73,95)   | 13     | 23   | 4 (4,4)                  | 5 (3,5) | 19.1   | 3    | 57 (52,64)          | 66 (51,76) | 16.4   | 5    |
| Idaho                | 11 (9,13)                | 13 (11,15) | 18.3   | 18   | 85 (69,104)         | 97 (84,110)  | 14.3   | 27   | 4 (4,5)                  | 6 (4,7) | 39.1   | 39   | 62 (57,69)          | 81 (62,91) | 29.7   | 38   |
| Illinois             | 10 (9,13)                | 12 (11,14) | 19.3   | 24   | 83 (68,101)         | 93 (82,105)  | 12.6   | 22   | 4 (3,4)                  | 5 (4,5) | 28.3   | 13   | 58 (52,69)          | 69 (59,77) | 19.7   | 10   |
| Indiana              | 11 (9,13)                | 14 (12,15) | 26.6   | 42   | 85 (69,105)         | 102 (89,115) | 20.3   | 42   | 4 (4,5)                  | 5 (4,6) | 38.9   | 37   | 59 (54,70)          | 77 (65,87) | 31.4   | 42   |
| Iowa                 | 10 (8,13)                | 12 (10,14) | 15.4   | 13   | 82 (66,101)         | 89 (77,100)  | 8.8    | 12   | 4 (3,4)                  | 5 (4,6) | 40.5   | 41   | 56 (51,64)          | 73 (60,82) | 30.3   | 40   |
| Kansas               | 11 (9,14)                | 14 (12,16) | 28.1   | 46   | 89 (72,110)         | 110 (96,123) | 23.1   | 46   | 4 (4,4)                  | 6 (4,6) | 49.6   | 50   | 59 (54,67)          | 83 (66,93) | 39.2   | 50   |
| Kentucky             | 11 (9,13)                | 13 (11,15) | 22.1   | 31   | 84 (68,102)         | 98 (86,111)  | 17.4   | 33   | 4 (4,5)                  | 5 (4,6) | 41.9   | 45   | 59 (53,70)          | 78 (66,87) | 33     | 46   |
| Louisiana            | 11 (9,13)                | 13 (11,15) | 19.6   | 26   | 84 (69,103)         | 96 (84,108)  | 14.5   | 28   | 4 (3,5)                  | 5 (4,5) | 32.9   | 21   | 59 (54,72)          | 74 (65,82) | 25     | 26   |
| Maine                | 11 (9,13)                | 15 (12,17) | 31.9   | 49   | 88 (71,107)         | 111 (97,126) | 25.5   | 49   | 4 (4,5)                  | 6 (4,7) | 44.6   | 48   | 63 (57,70)          | 84 (68,95) | 34.2   | 47   |
| Maryland             | 11 (9,13)                | 13 (11,15) | 23.6   | 36   | 84 (69,103)         | 100 (87,112) | 18.1   | 37   | 4 (4,5)                  | 5 (4,5) | 26.4   | 10   | 61 (55,73)          | 72 (61,81) | 19.4   | 9    |
| Massachusetts        | 11 (9,13)                | 13 (12,15) | 25.3   | 41   | 85 (69,105)         | 102 (89,115) | 20     | 41   | 4 (3,5)                  | 5 (4,5) | 32.3   | 19   | 58 (53,69)          | 71 (61,80) | 24.1   | 19   |
| Michigan             | 11 (9,13)                | 13 (11,15) | 22.9   | 34   | 84 (68,103)         | 99 (85,112)  | 17.8   | 35   | 4 (3,5)                  | 5 (4,6) | 34     | 26   | 58 (53,70)          | 73 (63,82) | 26.2   | 30   |
| Minnesota            | 10 (8,13)                | 12 (11,14) | 19.7   | 27   | 83 (67,101)         | 92 (80,104)  | 11.4   | 18   | 4 (4,4)                  | 5 (4,6) | 36.1   | 33   | 60 (55,68)          | 75 (59,84) | 25.2   | 27   |
| Mississippi          | 10 (8,13)                | 10 (9,12)  | -2.2   | 1    | 80 (63,100)         | 72 (61,85)   | -9.3   | 1    | 4 (3,4)                  | 5 (4,5) | 33.8   | 25   | 56 (51,68)          | 69 (61,77) | 22.8   | 16   |
| Missouri             | 11 (9,13)                | 14 (12,16) | 29.9   | 47   | 87 (70,106)         | 107 (93,120) | 23.6   | 47   | 4 (4,4)                  | 5 (4,6) | 39     | 38   | 59 (54,69)          | 77 (65,86) | 30.9   | 41   |
| Montana              | 10 (8,13)                | 12 (11,14) | 18.7   | 20   | 82 (66,102)         | 92 (80,104)  | 11.5   | 20   | 4 (4,5)                  | 6 (5,7) | 48.5   | 49   | 60 (55,68)          | 82 (68,92) | 37.3   | 49   |
| Nebraska             | 10 (8,12)                | 11 (9,12)  | 8.3    | 4    | 77 (62,97)          | 77 (67,88)   | 0.1    | 4    | 4 (4,4)                  | 5 (4,6) | 41.6   | 43   | 58 (53,67)          | 74 (60,83) | 27.8   | 35   |

|                |           |            |      |    |             |              |      |    |         |         |      |    |            |            |      |    |
|----------------|-----------|------------|------|----|-------------|--------------|------|----|---------|---------|------|----|------------|------------|------|----|
| Nevada         | 10 (8,13) | 12 (11,14) | 18.1 | 17 | 81 (65,99)  | 90 (78,102)  | 11   | 17 | 4 (4,5) | 5 (4,6) | 21.9 | 6  | 61 (56,72) | 72 (61,80) | 17.3 | 6  |
| New Hampshire  | 11 (9,13) | 14 (12,16) | 27.2 | 43 | 86 (70,107) | 104 (91,118) | 20.9 | 43 | 4 (4,5) | 6 (4,6) | 33.6 | 24 | 63 (58,72) | 79 (65,88) | 24.2 | 21 |
| New Jersey     | 11 (9,13) | 13 (11,15) | 22.7 | 33 | 84 (68,103) | 98 (86,111)  | 16.8 | 30 | 4 (3,5) | 4 (4,5) | 21.5 | 5  | 58 (53,71) | 67 (57,75) | 15.4 | 4  |
| New Mexico     | 10 (8,13) | 12 (10,13) | 13.2 | 8  | 81 (65,100) | 88 (76,98)   | 8.5  | 11 | 4 (4,4) | 5 (4,6) | 30.9 | 14 | 62 (57,68) | 77 (60,86) | 24.8 | 24 |
| New York       | 10 (9,13) | 14 (12,16) | 33.6 | 50 | 83 (68,101) | 107 (93,121) | 29.5 | 50 | 4 (3,4) | 5 (4,5) | 28.1 | 12 | 57 (52,68) | 69 (57,78) | 22.2 | 14 |
| North Carolina | 10 (8,12) | 12 (10,14) | 18.8 | 21 | 80 (65,98)  | 90 (78,101)  | 12.2 | 21 | 4 (3,4) | 5 (4,5) | 33.2 | 23 | 57 (52,69) | 71 (61,80) | 24.2 | 20 |
| North Dakota   | 11 (9,13) | 12 (11,14) | 15.6 | 14 | 85 (68,104) | 93 (80,105)  | 9.8  | 15 | 4 (4,5) | 5 (4,6) | 36   | 32 | 61 (56,69) | 79 (66,87) | 29.8 | 39 |
| Ohio           | 11 (9,13) | 13 (11,15) | 23.2 | 35 | 84 (68,103) | 99 (87,111)  | 18.6 | 39 | 4 (3,5) | 5 (4,6) | 40.2 | 40 | 58 (53,70) | 76 (65,85) | 32   | 43 |
| Oklahoma       | 10 (8,13) | 12 (10,14) | 18.4 | 19 | 80 (64,99)  | 89 (78,101)  | 11.5 | 19 | 4 (3,4) | 5 (4,6) | 41.8 | 44 | 57 (51,66) | 75 (65,84) | 32.9 | 45 |
| Oregon         | 10 (8,13) | 12 (10,14) | 13.9 | 10 | 81 (65,100) | 89 (77,100)  | 9.2  | 13 | 4 (4,5) | 5 (4,6) | 32.3 | 18 | 60 (55,68) | 75 (60,84) | 24.1 | 18 |
| Pennsylvania   | 11 (9,13) | 13 (12,15) | 23.6 | 37 | 86 (70,106) | 101 (88,114) | 17.1 | 31 | 4 (4,5) | 5 (4,5) | 34.1 | 27 | 58 (53,70) | 73 (63,81) | 25.7 | 29 |
| Rhode Island   | 10 (8,13) | 12 (11,14) | 19.5 | 25 | 82 (67,100) | 93 (81,105)  | 13.2 | 24 | 4 (4,4) | 5 (4,5) | 30.9 | 15 | 59 (54,68) | 72 (61,81) | 22.1 | 13 |
| South Carolina | 10 (8,13) | 11 (10,13) | 13   | 7  | 80 (64,98)  | 86 (76,97)   | 8.3  | 9  | 4 (3,4) | 5 (4,6) | 40.5 | 42 | 57 (52,69) | 74 (63,83) | 27.9 | 36 |
| South Dakota   | 10 (8,12) | 10 (9,12)  | 2.1  | 2  | 78 (62,98)  | 75 (65,85)   | -4.4 | 3  | 4 (3,4) | 5 (4,6) | 38.4 | 36 | 56 (51,65) | 72 (62,79) | 27.4 | 34 |
| Tennessee      | 10 (8,12) | 12 (10,13) | 14   | 11 | 79 (64,97)  | 86 (74,98)   | 8.4  | 10 | 4 (3,4) | 5 (4,5) | 34.7 | 28 | 56 (51,69) | 71 (63,79) | 25.3 | 28 |
| Texas          | 11 (9,13) | 14 (12,16) | 27.7 | 45 | 85 (70,104) | 104 (91,117) | 21.8 | 44 | 4 (4,4) | 5 (4,6) | 35.6 | 31 | 59 (54,67) | 75 (62,83) | 27   | 31 |
| Utah           | 10 (8,13) | 12 (10,13) | 13.3 | 9  | 81 (65,101) | 88 (76,99)   | 7.7  | 7  | 4 (4,5) | 6 (4,7) | 36.7 | 35 | 65 (59,71) | 83 (61,94) | 28.1 | 37 |
| Vermont        | 11 (9,14) | 15 (13,17) | 30.9 | 48 | 90 (73,110) | 112 (97,126) | 24   | 48 | 5 (4,5) | 6 (4,6) | 25.5 | 7  | 69 (63,76) | 83 (65,92) | 20.4 | 12 |
| Virginia       | 10 (8,13) | 13 (11,14) | 21.1 | 29 | 82 (66,102) | 94 (81,106)  | 14.2 | 26 | 4 (4,5) | 5 (4,5) | 26.4 | 9  | 58 (53,71) | 69 (60,77) | 18.6 | 7  |
| Washington     | 11 (9,13) | 13 (12,15) | 23.6 | 38 | 86 (70,104) | 102 (88,114) | 18   | 36 | 4 (4,4) | 5 (4,6) | 31.4 | 16 | 61 (56,68) | 75 (61,85) | 24.2 | 22 |
| West Virginia  | 11 (9,13) | 13 (11,15) | 21.3 | 30 | 85 (69,104) | 100 (87,112) | 17.7 | 34 | 4 (3,5) | 5 (4,6) | 43.7 | 47 | 58 (53,71) | 79 (68,88) | 35.1 | 48 |
| Wisconsin      | 10 (8,13) | 12 (10,14) | 16.5 | 16 | 81 (66,100) | 89 (78,101)  | 9.5  | 14 | 4 (4,5) | 5 (4,6) | 31.6 | 17 | 57 (53,68) | 70 (59,79) | 22.7 | 15 |

eTable 4. Age-adjusted incidence, prevalence, mortality, and disability-adjusted life years (DALY) rates per 100,000 for epilepsy by US states in 1990 and 2017, and the percentage change between 1990 and 2017

| Location             | Incidence rates (95% UI) |            |        |      | Prevalence (95% UI) |               |        |      | Mortality rates (95% UI) |         |        |      | DALY rates (95% UI) |              |        |      |
|----------------------|--------------------------|------------|--------|------|---------------------|---------------|--------|------|--------------------------|---------|--------|------|---------------------|--------------|--------|------|
|                      | 1990                     | 2017       | Change | Rank | 1990                | 2017          | Change | Rank | 1990                     | 2017    | Change | Rank | 1990                | 2017         | Change | Rank |
| Alabama              | 40 (11,65)               | 48 (14,75) | 21.5   | 38   | 342 (101,560)       | 413 (117,635) | 20.8   | 42   | 1 (1,1)                  | 1 (1,1) | 9.4    | 36   | 121 (50,239)        | 136 (57,264) | 12.1   | 43   |
| Alaska               | 38 (11,61)               | 42 (13,65) | 8.4    | 4    | 314 (87,494)        | 316 (101,488) | 0.7    | 2    | 1 (1,1)                  | 1 (1,1) | -2.8   | 18   | 112 (52,217)        | 105 (48,203) | -5.6   | 2    |
| Arizona              | 39 (10,64)               | 47 (14,73) | 21.3   | 37   | 329 (86,534)        | 395 (117,596) | 19.9   | 37   | 0 (0,1)                  | 0 (0,1) | -1.2   | 23   | 105 (40,212)        | 117 (40,240) | 10.8   | 40   |
| Arkansas             | 39 (12,64)               | 47 (13,73) | 18.5   | 27   | 335 (100,533)       | 395 (111,608) | 17.7   | 31   | 1 (1,1)                  | 1 (1,1) | 11.1   | 42   | 118 (50,218)        | 130 (53,258) | 10.3   | 36   |
| California           | 41 (10,67)               | 46 (12,73) | 12.1   | 6    | 365 (93,581)        | 386 (99,602)  | 5.6    | 5    | 0 (0,1)                  | 0 (0,1) | -5.1   | 13   | 116 (41,231)        | 113 (38,240) | -2     | 4    |
| Colorado             | 40 (11,65)               | 48 (15,74) | 18.8   | 29   | 347 (89,561)        | 397 (129,609) | 14.5   | 22   | 1 (1,1)                  | 1 (1,1) | 2      | 29   | 117 (47,229)        | 124 (51,250) | 5.8    | 22   |
| Connecticut          | 42 (12,66)               | 49 (15,78) | 18     | 25   | 364 (108,578)       | 426 (131,666) | 16.9   | 27   | 0 (0,0)                  | 0 (0,0) | -2.2   | 20   | 109 (38,229)        | 117 (38,249) | 7.4    | 29   |
| Delaware             | 44 (11,71)               | 52 (15,83) | 19.3   | 31   | 409 (105,641)       | 483 (139,751) | 17.9   | 32   | 1 (1,1)                  | 1 (1,1) | -3.7   | 15   | 138 (51,264)        | 145 (53,287) | 5.5    | 21   |
| District of Columbia | 39 (10,63)               | 41 (12,64) | 6.6    | 3    | 325 (89,529)        | 314 (89,483)  | -3.4   | 1    | 1 (1,1)                  | 1 (1,1) | -38.4  | 1    | 138 (68,230)        | 105 (45,210) | -24    | 1    |
| Florida              | 40 (11,65)               | 49 (14,76) | 22.1   | 41   | 353 (101,575)       | 424 (122,652) | 20.3   | 40   | 1 (1,1)                  | 1 (1,1) | -12    | 5    | 120 (51,233)        | 129 (46,260) | 6.8    | 25   |
| Georgia              | 41 (10,65)               | 50 (13,77) | 23.4   | 45   | 358 (88,570)        | 434 (117,661) | 21.3   | 43   | 1 (1,1)                  | 1 (0,1) | -15.6  | 3    | 123 (50,232)        | 132 (49,265) | 6.8    | 26   |
| Hawaii               | 37 (10,60)               | 46 (14,70) | 23.5   | 46   | 303 (85,494)        | 363 (114,547) | 20     | 38   | 0 (0,0)                  | 0 (0,0) | -2.2   | 21   | 95 (36,186)         | 105 (38,216) | 10.4   | 37   |
| Idaho                | 39 (13,64)               | 44 (12,71) | 12.7   | 8    | 333 (110,536)       | 362 (105,570) | 8.7    | 8    | 1 (1,1)                  | 1 (1,1) | 0.1    | 26   | 113 (48,223)        | 117 (48,233) | 3.3    | 14   |
| Illinois             | 40 (12,64)               | 49 (16,76) | 21     | 36   | 353 (102,556)       | 418 (133,646) | 18.7   | 35   | 1 (1,1)                  | 0 (0,1) | -13.2  | 4    | 117 (46,235)        | 122 (42,249) | 4.3    | 18   |
| Indiana              | 41 (10,66)               | 49 (13,78) | 21.7   | 40   | 357 (89,574)        | 429 (111,670) | 20.3   | 39   | 1 (1,1)                  | 1 (1,1) | 10.4   | 40   | 115 (46,227)        | 134 (51,264) | 16.6   | 48   |
| Iowa                 | 37 (11,59)               | 41 (13,65) | 11.2   | 5    | 298 (87,476)        | 313 (94,481)  | 5      | 4    | 1 (1,1)                  | 1 (1,1) | 9.9    | 38   | 103 (47,196)        | 105 (48,198) | 2.2    | 10   |
| Kansas               | 39 (10,64)               | 46 (13,72) | 15.9   | 18   | 336 (85,551)        | 379 (107,584) | 12.7   | 18   | 1 (0,1)                  | 1 (1,1) | 12.3   | 43   | 108 (41,222)        | 118 (47,237) | 9.1    | 32   |
| Kentucky             | 42 (13,68)               | 52 (14,82) | 24.3   | 47   | 378 (118,600)       | 467 (127,726) | 23.5   | 48   | 1 (1,1)                  | 1 (1,1) | 14.4   | 44   | 127 (50,247)        | 145 (57,280) | 13.5   | 46   |
| Louisiana            | 42 (12,67)               | 50 (16,80) | 20.1   | 32   | 374 (108,591)       | 441 (145,692) | 18.1   | 33   | 1 (1,1)                  | 1 (1,1) | 3.1    | 31   | 130 (58,233)        | 146 (61,279) | 11.7   | 41   |
| Maine                | 40 (11,64)               | 47 (12,75) | 18.2   | 26   | 341 (95,549)        | 393 (106,614) | 15.5   | 23   | 0 (0,0)                  | 0 (0,1) | 10     | 39   | 104 (37,210)        | 114 (39,237) | 9.8    | 34   |
| Maryland             | 41 (11,65)               | 47 (14,76) | 13.9   | 12   | 361 (99,569)        | 398 (118,625) | 10.3   | 12   | 0 (0,1)                  | 0 (0,1) | -0.7   | 25   | 112 (39,224)        | 115 (39,231) | 3      | 12   |
| Massachusetts        | 42 (13,67)               | 50 (14,79) | 17.3   | 22   | 380 (119,603)       | 431 (123,675) | 13.3   | 20   | 0 (0,0)                  | 0 (0,1) | 2      | 30   | 114 (39,230)        | 120 (42,252) | 5.3    | 20   |
| Michigan             | 43 (11,68)               | 50 (13,79) | 16.4   | 20   | 390 (98,617)        | 438 (117,676) | 12.2   | 16   | 1 (1,1)                  | 1 (1,1) | -1.5   | 22   | 148 (69,270)        | 152 (70,288) | 2.8    | 11   |
| Minnesota            | 42 (11,68)               | 44 (11,69) | 4.1    | 2    | 366 (101,584)       | 369 (97,570)  | 0.8    | 3    | 0 (0,0)                  | 0 (0,0) | 3.4    | 32   | 106 (35,227)        | 102 (32,217) | -3.5   | 3    |
| Mississippi          | 39 (12,62)               | 44 (11,69) | 13.2   | 9    | 324 (101,506)       | 349 (90,538)  | 7.8    | 7    | 1 (1,1)                  | 1 (1,1) | 1      | 28   | 127 (61,224)        | 130 (59,240) | 1.9    | 9    |
| Missouri             | 40 (10,65)               | 47 (14,74) | 19     | 30   | 343 (91,557)        | 397 (119,613) | 15.7   | 24   | 1 (1,1)                  | 1 (1,1) | 8.6    | 34   | 118 (46,236)        | 127 (51,256) | 7.4    | 28   |
| Montana              | 41 (11,66)               | 49 (12,76) | 20.2   | 33   | 354 (96,569)        | 415 (99,637)  | 17.4   | 29   | 1 (1,1)                  | 1 (1,1) | 21.3   | 47   | 121 (46,238)        | 134 (50,259) | 10.3   | 35   |
| Nebraska             | 37 (11,59)               | 42 (13,66) | 13.6   | 10   | 295 (86,471)        | 323 (101,500) | 9.7    | 9    | 0 (0,1)                  | 1 (0,1) | 6.9    | 33   | 95 (38,189)         | 103 (42,211) | 8.1    | 30   |



|                |            |            |      |    |               |               |      |    |         |         |       |    |              |              |      |    |
|----------------|------------|------------|------|----|---------------|---------------|------|----|---------|---------|-------|----|--------------|--------------|------|----|
| Nevada         | 42 (14,67) | 49 (15,78) | 17.5 | 24 | 371 (121,587) | 430 (126,662) | 15.8 | 25 | 1 (1,1) | 0 (0,1) | -10.4 | 7  | 120 (47,245) | 126 (42,260) | 5.8  | 23 |
| New Hampshire  | 39 (12,63) | 47 (13,73) | 18.7 | 28 | 330 (96,521)  | 384 (103,593) | 16.3 | 26 | 0 (0,0) | 0 (0,0) | 9.8   | 37 | 99 (37,206)  | 108 (38,222) | 9    | 31 |
| New Jersey     | 42 (11,68) | 52 (14,81) | 22.2 | 42 | 386 (99,610)  | 461 (130,712) | 19.2 | 36 | 0 (0,0) | 0 (0,0) | -11.6 | 6  | 119 (41,251) | 126 (40,272) | 6.1  | 24 |
| New Mexico     | 45 (11,74) | 51 (14,80) | 12.1 | 7  | 380 (102,611) | 449 (128,692) | 18.2 | 34 | 0 (0,1) | 1 (0,1) | 10.9  | 41 | 121 (45,240) | 134 (49,275) | 10.5 | 39 |
| New York       | 44 (11,71) | 52 (13,80) | 17.3 | 23 | 384 (103,618) | 472 (128,722) | 22.7 | 46 | 0 (0,1) | 0 (0,0) | -18   | 2  | 121 (42,246) | 126 (41,274) | 4.1  | 17 |
| North Carolina | 38 (11,61) | 46 (13,72) | 20.3 | 35 | 322 (87,515)  | 377 (107,584) | 17   | 28 | 1 (1,1) | 1 (0,1) | -9.2  | 8  | 110 (44,218) | 115 (41,231) | 4.5  | 19 |
| North Dakota   | 38 (11,61) | 44 (13,67) | 15.7 | 17 | 309 (86,492)  | 342 (106,520) | 10.7 | 14 | 1 (1,1) | 1 (1,1) | 31.6  | 50 | 105 (44,201) | 119 (54,229) | 12.4 | 44 |
| Ohio           | 42 (12,67) | 51 (14,80) | 22.5 | 43 | 379 (109,612) | 459 (121,711) | 21.3 | 44 | 1 (0,1) | 1 (1,1) | 16.1  | 45 | 122 (44,248) | 138 (50,279) | 13.9 | 47 |
| Oklahoma       | 40 (12,65) | 49 (15,76) | 22.8 | 44 | 351 (107,565) | 427 (137,650) | 21.6 | 45 | 1 (0,1) | 1 (1,1) | 21.6  | 48 | 114 (46,224) | 136 (52,266) | 20.2 | 49 |
| Oregon         | 40 (11,64) | 46 (14,72) | 16.3 | 19 | 336 (92,536)  | 380 (121,591) | 13.1 | 19 | 1 (1,1) | 1 (0,1) | -5.3  | 12 | 110 (43,210) | 114 (44,227) | 3.8  | 16 |
| Pennsylvania   | 42 (12,68) | 51 (14,81) | 21.6 | 39 | 382 (106,605) | 459 (131,700) | 20.3 | 41 | 1 (1,1) | 1 (0,1) | -0.9  | 24 | 122 (45,239) | 134 (47,285) | 9.5  | 33 |
| Rhode Island   | 41 (10,67) | 49 (14,77) | 20.3 | 34 | 361 (93,590)  | 424 (116,651) | 17.6 | 30 | 0 (0,0) | 0 (0,0) | -2.9  | 17 | 111 (38,229) | 119 (40,254) | 7.2  | 27 |
| South Carolina | 40 (12,66) | 46 (14,72) | 14.4 | 15 | 347 (100,558) | 383 (123,597) | 10.4 | 13 | 1 (1,1) | 1 (1,1) | -4.3  | 14 | 130 (59,242) | 131 (59,242) | 0.6  | 7  |
| South Dakota   | 39 (10,62) | 45 (12,71) | 14.4 | 14 | 331 (86,523)  | 365 (98,565)  | 10.1 | 10 | 1 (1,1) | 1 (1,1) | 24.8  | 49 | 126 (56,234) | 139 (69,263) | 10.4 | 38 |
| Tennessee      | 39 (10,63) | 48 (13,75) | 24.3 | 48 | 333 (87,540)  | 408 (111,627) | 22.7 | 47 | 1 (1,1) | 1 (1,1) | -2.6  | 19 | 113 (45,224) | 127 (48,254) | 12.5 | 45 |
| Texas          | 32 (9,53)  | 41 (11,65) | 27.5 | 50 | 319 (93,521)  | 396 (106,610) | 24   | 49 | 1 (1,1) | 1 (0,1) | -3.4  | 16 | 108 (42,209) | 121 (42,254) | 11.9 | 42 |
| Utah           | 38 (11,60) | 43 (13,68) | 13.8 | 11 | 313 (90,497)  | 347 (101,536) | 10.9 | 15 | 0 (0,1) | 1 (0,1) | 9.2   | 35 | 101 (40,201) | 105 (39,215) | 3.5  | 15 |
| Vermont        | 38 (12,60) | 44 (12,69) | 14.3 | 13 | 311 (92,490)  | 343 (97,529)  | 10.3 | 11 | 1 (0,1) | 0 (0,1) | -5.6  | 11 | 101 (41,197) | 101 (38,209) | 0    | 6  |
| Virginia       | 41 (10,66) | 48 (13,76) | 16.7 | 21 | 369 (93,587)  | 419 (120,647) | 13.7 | 21 | 1 (1,1) | 1 (0,1) | -8.1  | 9  | 119 (45,233) | 122 (44,261) | 3.2  | 13 |
| Washington     | 40 (10,64) | 46 (12,73) | 15.6 | 16 | 338 (86,550)  | 380 (100,598) | 12.4 | 17 | 1 (1,1) | 1 (0,1) | -7.9  | 10 | 114 (46,220) | 116 (44,239) | 1.6  | 8  |
| West Virginia  | 41 (12,67) | 52 (15,83) | 26.3 | 49 | 378 (116,612) | 484 (142,758) | 28.2 | 50 | 1 (0,1) | 1 (1,1) | 18    | 46 | 121 (46,232) | 148 (55,311) | 22.3 | 50 |
| Wisconsin      | 51 (14,80) | 52 (14,82) | 3    | 1  | 376 (104,600) | 399 (104,618) | 6.2  | 6  | 0 (0,0) | 0 (0,1) | 0.6   | 27 | 116 (42,240) | 116 (41,243) | -0.1 | 5  |

eTable 5. Age-adjusted incidence, prevalence, mortality, and disability-adjusted life years (DALY) rates per 100,000 for multiple sclerosis by US states in 1990 and 2017, and the percentage change between 1990 and 2017

| Location             | Incidence rates (95% UI) |         |        |      | Prevalence (95% UI) |               |        |      | Mortality rates (95% UI) |         |        |      | DALY rates (95% UI) |             |        |      |
|----------------------|--------------------------|---------|--------|------|---------------------|---------------|--------|------|--------------------------|---------|--------|------|---------------------|-------------|--------|------|
|                      | 1990                     | 2017    | Change | Rank | 1990                | 2017          | Change | Rank | 1990                     | 2017    | Change | Rank | 1990                | 2017        | Change | Rank |
| Alabama              | 2 (2,3)                  | 3 (2,3) | 13.9   | 21   | 67 (60,75)          | 79 (73,86)    | 17.2   | 31   | 0 (0,1)                  | 1 (1,1) | 44.8   | 36   | 31 (24,43)          | 38 (31,50)  | 24.9   | 33   |
| Alaska               | 3 (3,4)                  | 3 (3,4) | 1.7    | 1    | 93 (81,108)         | 96 (89,103)   | 2.2    | 1    | 1 (1,1)                  | 1 (1,1) | 30.6   | 16   | 45 (35,63)          | 51 (43,61)  | 13.1   | 8    |
| Arizona              | 3 (2,3)                  | 3 (3,3) | 15.7   | 29   | 78 (71,87)          | 92 (85,98)    | 16.8   | 27   | 1 (1,1)                  | 1 (1,1) | 32.5   | 19   | 38 (32,44)          | 45 (36,53)  | 18.4   | 20   |
| Arkansas             | 2 (2,2)                  | 3 (2,3) | 16.1   | 31   | 61 (55,69)          | 71 (67,77)    | 16.6   | 26   | 0 (0,1)                  | 1 (1,1) | 53     | 42   | 30 (24,40)          | 39 (32,48)  | 30     | 45   |
| California           | 3 (2,3)                  | 3 (3,3) | 7.7    | 4    | 73 (66,81)          | 79 (74,85)    | 8.2    | 6    | 1 (1,1)                  | 1 (0,1) | 13.3   | 3    | 37 (31,43)          | 37 (30,45)  | 2.5    | 2    |
| Colorado             | 4 (3,4)                  | 5 (4,5) | 19.3   | 44   | 111 (100,124)       | 133 (124,143) | 19.9   | 44   | 1 (1,1)                  | 1 (1,1) | 39.6   | 26   | 52 (41,62)          | 63 (46,77)  | 22.1   | 28   |
| Connecticut          | 3 (3,4)                  | 4 (4,4) | 13.8   | 20   | 103 (92,115)        | 120 (112,129) | 17.1   | 30   | 1 (1,1)                  | 1 (1,1) | 20.8   | 6    | 46 (38,55)          | 52 (42,63)  | 13.6   | 9    |
| Delaware             | 3 (3,3)                  | 3 (3,4) | 12.9   | 17   | 89 (80,100)         | 104 (97,112)  | 16.9   | 28   | 1 (1,1)                  | 1 (1,1) | 27.9   | 10   | 41 (33,50)          | 48 (40,57)  | 18.4   | 19   |
| District of Columbia | 3 (3,4)                  | 3 (3,4) | 2.8    | 2    | 90 (81,100)         | 92 (86,99)    | 2.9    | 2    | 1 (1,1)                  | 1 (1,1) | 0.3    | 1    | 50 (41,68)          | 48 (39,57)  | -4     | 1    |
| Florida              | 2 (2,3)                  | 3 (3,3) | 13.5   | 18   | 72 (65,80)          | 84 (78,90)    | 16.1   | 23   | 0 (0,1)                  | 1 (0,1) | 35.2   | 22   | 33 (27,40)          | 39 (32,46)  | 17.7   | 15   |
| Georgia              | 2 (2,3)                  | 3 (3,3) | 15.4   | 28   | 68 (61,76)          | 81 (76,87)    | 19.6   | 40   | 0 (0,1)                  | 1 (1,1) | 31.9   | 18   | 32 (26,42)          | 39 (32,46)  | 19.7   | 24   |
| Hawaii               | 1 (1,1)                  | 1 (1,1) | 2.8    | 3    | 37 (33,42)          | 39 (36,42)    | 4.6    | 3    | 0 (0,1)                  | 0 (0,1) | 20     | 5    | 17 (12,26)          | 19 (14,27)  | 9      | 4    |
| Idaho                | 4 (3,4)                  | 5 (4,5) | 20.2   | 46   | 110 (100,122)       | 132 (123,141) | 19.7   | 42   | 1 (1,1)                  | 1 (1,2) | 43.8   | 32   | 54 (42,64)          | 68 (48,82)  | 25.6   | 36   |
| Illinois             | 3 (3,3)                  | 3 (3,4) | 16.6   | 36   | 86 (77,96)          | 102 (94,109)  | 18.3   | 36   | 1 (1,1)                  | 1 (1,1) | 30.9   | 17   | 43 (37,51)          | 50 (40,59)  | 16.5   | 13   |
| Indiana              | 3 (3,3)                  | 3 (3,4) | 18.2   | 42   | 84 (76,94)          | 99 (92,105)   | 17.3   | 32   | 1 (1,1)                  | 1 (1,1) | 54.5   | 44   | 40 (33,48)          | 51 (41,61)  | 28.4   | 43   |
| Iowa                 | 3 (3,3)                  | 3 (3,3) | 10.8   | 9    | 84 (75,93)          | 91 (85,97)    | 8.1    | 5    | 1 (1,1)                  | 1 (1,1) | 51.8   | 41   | 41 (34,49)          | 50 (39,60)  | 22.6   | 30   |
| Kansas               | 3 (3,3)                  | 3 (3,3) | 14.6   | 25   | 83 (75,92)          | 93 (87,100)   | 12.9   | 15   | 1 (1,1)                  | 1 (1,1) | 56     | 45   | 40 (34,48)          | 52 (39,62)  | 27.5   | 41   |
| Kentucky             | 3 (2,3)                  | 3 (3,3) | 15.2   | 27   | 78 (70,88)          | 92 (86,99)    | 17.4   | 33   | 0 (0,1)                  | 1 (1,1) | 49     | 40   | 34 (27,45)          | 43 (36,53)  | 26.2   | 38   |
| Louisiana            | 2 (2,2)                  | 2 (2,2) | 9.7    | 6    | 60 (53,67)          | 68 (63,73)    | 12.7   | 14   | 0 (0,1)                  | 1 (0,1) | 32.6   | 20   | 29 (22,40)          | 34 (28,45)  | 17.8   | 17   |
| Maine                | 4 (3,4)                  | 4 (4,4) | 12.1   | 12   | 106 (95,117)        | 118 (111,126) | 11.7   | 10   | 1 (1,1)                  | 1 (1,1) | 37.4   | 23   | 51 (42,59)          | 61 (46,73)  | 19.3   | 22   |
| Maryland             | 3 (3,3)                  | 3 (3,4) | 12.5   | 14   | 86 (78,97)          | 99 (93,106)   | 14.8   | 20   | 1 (1,1)                  | 1 (1,1) | 28.3   | 11   | 42 (35,50)          | 48 (40,57)  | 16.1   | 11   |
| Massachusetts        | 4 (3,4)                  | 4 (4,4) | 10.9   | 11   | 106 (95,118)        | 118 (110,126) | 11.2   | 8    | 1 (1,1)                  | 1 (1,1) | 27.3   | 8    | 50 (41,58)          | 56 (44,67)  | 12.7   | 7    |
| Michigan             | 4 (3,4)                  | 5 (4,5) | 23     | 48   | 106 (96,118)        | 131 (122,140) | 23.8   | 49   | 1 (1,1)                  | 1 (1,1) | 47.6   | 38   | 52 (44,61)          | 66 (49,81)  | 26.7   | 40   |
| Minnesota            | 4 (3,4)                  | 4 (4,4) | 9.1    | 5    | 102 (92,113)        | 109 (102,117) | 6.8    | 4    | 1 (1,1)                  | 1 (1,1) | 38     | 24   | 49 (40,59)          | 57 (42,68)  | 14.9   | 10   |
| Mississippi          | 2 (2,2)                  | 2 (2,2) | 12.8   | 15   | 49 (43,56)          | 56 (52,61)    | 14.4   | 18   | 0 (0,1)                  | 1 (0,1) | 42.4   | 30   | 25 (19,38)          | 31 (25,44)  | 24.3   | 31   |
| Missouri             | 3 (3,3)                  | 3 (3,4) | 18.5   | 43   | 85 (77,95)          | 102 (95,109)  | 19.6   | 41   | 1 (1,1)                  | 1 (1,1) | 45.7   | 37   | 40 (33,48)          | 50 (40,59)  | 25.6   | 37   |
| Montana              | 4 (4,5)                  | 5 (5,5) | 19.6   | 45   | 121 (109,134)       | 144 (135,153) | 19.1   | 39   | 1 (1,1)                  | 2 (1,2) | 63     | 50   | 61 (46,72)          | 82 (53,102) | 35     | 50   |
| Nebraska             | 3 (3,4)                  | 4 (4,4) | 14.1   | 22   | 95 (86,106)         | 107 (100,113) | 11.8   | 11   | 1 (1,1)                  | 1 (1,2) | 48.6   | 39   | 49 (40,57)          | 61 (43,74)  | 24.5   | 32   |

|                |         |         |      |    |               |               |      |    |         |         |      |    |            |            |      |    |
|----------------|---------|---------|------|----|---------------|---------------|------|----|---------|---------|------|----|------------|------------|------|----|
| Nevada         | 3 (3,3) | 3 (3,4) | 16.3 | 33 | 87 (78,97)    | 105 (97,112)  | 20.4 | 45 | 1 (0,1) | 1 (1,1) | 27.8 | 9  | 39 (31,48) | 46 (38,55) | 18.6 | 21 |
| New Hampshire  | 4 (3,4) | 4 (4,4) | 12.4 | 13 | 108 (97,120)  | 123 (115,131) | 13.8 | 16 | 1 (1,1) | 1 (1,1) | 30.4 | 15 | 51 (42,60) | 60 (45,72) | 17.7 | 16 |
| New Jersey     | 3 (3,3) | 3 (3,4) | 10   | 7  | 91 (81,101)   | 102 (95,109)  | 12.4 | 12 | 1 (1,1) | 1 (1,1) | 17.8 | 4  | 43 (36,51) | 47 (38,56) | 8.8  | 3  |
| New Mexico     | 3 (3,3) | 3 (3,3) | 17.3 | 39 | 79 (72,88)    | 94 (88,101)   | 19   | 38 | 1 (1,1) | 1 (1,1) | 42   | 29 | 39 (33,46) | 50 (37,60) | 26.5 | 39 |
| New York       | 3 (3,4) | 4 (4,4) | 16   | 30 | 99 (89,110)   | 120 (111,129) | 20.6 | 46 | 1 (1,1) | 1 (1,1) | 11.8 | 2  | 46 (37,55) | 50 (40,61) | 9.9  | 5  |
| North Carolina | 3 (2,3) | 3 (3,3) | 17.2 | 38 | 77 (69,86)    | 92 (85,99)    | 19.8 | 43 | 1 (0,1) | 1 (1,1) | 38.3 | 25 | 36 (28,45) | 44 (36,51) | 22.2 | 29 |
| North Dakota   | 4 (3,4) | 4 (4,4) | 14.2 | 23 | 104 (94,115)  | 117 (109,125) | 12.5 | 13 | 1 (1,1) | 1 (1,2) | 60.5 | 48 | 52 (42,61) | 68 (49,83) | 32.2 | 47 |
| Ohio           | 3 (3,4) | 4 (4,4) | 23.8 | 50 | 94 (85,105)   | 116 (109,124) | 23.6 | 48 | 1 (1,1) | 1 (1,1) | 58.4 | 47 | 45 (38,53) | 60 (45,72) | 33   | 49 |
| Oklahoma       | 2 (2,3) | 3 (3,3) | 17.3 | 41 | 65 (59,73)    | 76 (71,81)    | 16.1 | 22 | 1 (0,1) | 1 (1,1) | 61.1 | 49 | 32 (26,41) | 43 (34,51) | 32.7 | 48 |
| Oregon         | 4 (3,4) | 4 (4,4) | 14.9 | 26 | 102 (92,113)  | 117 (109,124) | 14.2 | 17 | 1 (1,1) | 1 (1,1) | 40   | 27 | 51 (41,60) | 60 (45,73) | 19.4 | 23 |
| Pennsylvania   | 3 (3,4) | 4 (4,4) | 21.1 | 47 | 101 (91,114)  | 124 (116,133) | 22.5 | 47 | 1 (1,1) | 1 (1,1) | 44.8 | 35 | 46 (38,55) | 58 (46,70) | 24.9 | 34 |
| Rhode Island   | 4 (4,4) | 5 (4,5) | 16.9 | 37 | 113 (102,126) | 134 (126,144) | 18.2 | 35 | 1 (1,1) | 1 (1,1) | 28.7 | 12 | 53 (44,63) | 63 (48,76) | 18   | 18 |
| South Carolina | 2 (2,3) | 3 (3,3) | 13.7 | 19 | 70 (63,79)    | 82 (77,88)    | 16.9 | 29 | 0 (0,1) | 1 (1,1) | 34.1 | 21 | 34 (27,44) | 40 (33,48) | 20.1 | 25 |
| South Dakota   | 3 (3,4) | 4 (4,4) | 16.2 | 32 | 96 (87,107)   | 111 (104,118) | 14.8 | 19 | 1 (1,1) | 1 (1,2) | 57.5 | 46 | 49 (39,57) | 64 (46,78) | 31.7 | 46 |
| Tennessee      | 3 (2,3) | 3 (3,3) | 16.5 | 35 | 74 (67,83)    | 88 (83,94)    | 18.8 | 37 | 0 (0,1) | 1 (1,1) | 44.8 | 34 | 34 (27,44) | 42 (35,51) | 25.1 | 35 |
| Texas          | 2 (2,2) | 2 (2,3) | 12.9 | 16 | 63 (56,71)    | 73 (68,79)    | 16.3 | 24 | 0 (0,1) | 1 (0,1) | 41.8 | 28 | 29 (23,38) | 35 (29,41) | 21.2 | 26 |
| Utah           | 4 (4,4) | 5 (5,5) | 23.2 | 49 | 118 (107,131) | 147 (138,157) | 24.3 | 50 | 1 (1,1) | 1 (1,2) | 44.6 | 33 | 56 (42,67) | 72 (49,88) | 27.6 | 42 |
| Vermont        | 4 (3,4) | 4 (4,4) | 10.7 | 8  | 106 (96,118)  | 118 (111,126) | 11.6 | 9  | 1 (1,1) | 1 (1,1) | 29.1 | 14 | 52 (42,61) | 60 (45,73) | 16.2 | 12 |
| Virginia       | 3 (3,3) | 3 (3,4) | 14.3 | 24 | 85 (77,95)    | 99 (93,106)   | 16.5 | 25 | 1 (0,1) | 1 (1,1) | 29   | 13 | 39 (32,47) | 46 (37,54) | 16.8 | 14 |
| Washington     | 4 (3,4) | 4 (4,5) | 10.8 | 10 | 110 (100,123) | 122 (114,130) | 10.5 | 7  | 1 (1,1) | 1 (1,1) | 27.1 | 7  | 53 (44,63) | 59 (46,70) | 10.7 | 6  |
| West Virginia  | 3 (2,3) | 3 (3,3) | 17.3 | 40 | 78 (69,87)    | 91 (85,98)    | 17.8 | 34 | 1 (0,1) | 1 (1,1) | 53.1 | 43 | 37 (30,46) | 47 (38,57) | 29.5 | 44 |
| Wisconsin      | 4 (3,4) | 4 (4,4) | 16.4 | 34 | 103 (93,115)  | 119 (111,127) | 15.2 | 21 | 1 (1,1) | 1 (1,1) | 43.3 | 31 | 49 (41,58) | 60 (44,72) | 21.4 | 27 |

eTable 6. Age-adjusted incidence, prevalence, mortality and disability-adjusted life years (DALY) rates per 100,000 for motor neuron disease by US states in 1990 and 2017, and the percentage change between 1990 and 2017

| Location             | Incidence rates (95% UI) |         |        |      | Prevalence (95% UI) |            |        |      | Mortality rates (95% UI) |         |        |      | DALY rates (95% UI) |            |        |      |
|----------------------|--------------------------|---------|--------|------|---------------------|------------|--------|------|--------------------------|---------|--------|------|---------------------|------------|--------|------|
|                      | 1990                     | 2017    | Change | Rank | 1990                | 2017       | Change | Rank | 1990                     | 2017    | Change | Rank | 1990                | 2017       | Change | Rank |
| Alabama              | 1 (1,2)                  | 2 (2,2) | 22.5   | 47   | 7 (6,8)             | 8 (7,8)    | 6.4    | 40   | 1 (1,1)                  | 2 (1,2) | 62.1   | 46   | 31 (28,33)          | 45 (40,52) | 48.5   | 49   |
| Alaska               | 2 (2,2)                  | 2 (2,2) | 7      | 5    | 9 (8,10)            | 9 (8,10)   | -1.5   | 19   | 1 (1,1)                  | 2 (1,2) | 32.7   | 12   | 37 (34,41)          | 46 (40,53) | 23.7   | 21   |
| Arizona              | 2 (2,2)                  | 2 (2,2) | 13.7   | 24   | 9 (8,10)            | 9 (8,10)   | 0.6    | 26   | 1 (1,1)                  | 2 (1,2) | 43.4   | 26   | 36 (33,38)          | 44 (39,51) | 24.7   | 24   |
| Arkansas             | 2 (2,2)                  | 2 (2,2) | 22.4   | 46   | 8 (7,9)             | 9 (8,9)    | 9.4    | 44   | 1 (1,1)                  | 2 (2,2) | 62.7   | 47   | 36 (33,39)          | 52 (45,60) | 44.2   | 45   |
| California           | 2 (2,2)                  | 2 (2,2) | 3      | 2    | 9 (8,10)            | 9 (8,9)    | -5.1   | 13   | 1 (1,1)                  | 1 (1,2) | 17     | 3    | 36 (33,38)          | 35 (31,40) | -1.1   | 2    |
| Colorado             | 2 (2,2)                  | 2 (2,2) | 16.1   | 32   | 11 (10,12)          | 11 (10,12) | 2.4    | 34   | 1 (1,1)                  | 2 (2,2) | 41.2   | 22   | 42 (39,47)          | 51 (44,57) | 20.1   | 15   |
| Connecticut          | 2 (2,2)                  | 2 (2,2) | 7.2    | 7    | 11 (10,12)          | 11 (10,12) | -1.5   | 20   | 1 (1,1)                  | 2 (1,2) | 27.4   | 9    | 36 (33,39)          | 41 (36,47) | 14.4   | 8    |
| Delaware             | 2 (2,2)                  | 2 (2,2) | 10.5   | 13   | 10 (9,11)           | 10 (9,11)  | 5.3    | 38   | 1 (1,1)                  | 2 (1,2) | 27.3   | 8    | 38 (35,41)          | 45 (39,50) | 18.4   | 14   |
| District of Columbia | 2 (2,2)                  | 2 (2,2) | 0.3    | 1    | 10 (9,11)           | 11 (10,12) | 7.7    | 42   | 1 (1,1)                  | 1 (1,1) | -1.2   | 1    | 45 (39,56)          | 36 (31,42) | -20.5  | 1    |
| Florida              | 2 (2,2)                  | 2 (2,2) | 9.8    | 11   | 8 (7,9)             | 8 (8,9)    | -2.8   | 17   | 1 (1,1)                  | 1 (1,2) | 37.4   | 18   | 35 (32,39)          | 40 (35,45) | 12.9   | 7    |
| Georgia              | 2 (1,2)                  | 2 (2,2) | 13.7   | 25   | 8 (7,8)             | 8 (7,8)    | -0.9   | 23   | 1 (1,1)                  | 1 (1,2) | 43.3   | 25   | 32 (29,34)          | 39 (35,44) | 24.4   | 23   |
| Hawaii               | 1 (1,2)                  | 2 (1,2) | 12.4   | 19   | 9 (8,10)            | 9 (9,10)   | 3.5    | 36   | 1 (1,1)                  | 1 (1,1) | 35.3   | 15   | 27 (25,30)          | 34 (29,39) | 23     | 20   |
| Idaho                | 2 (2,2)                  | 2 (2,2) | 9.9    | 12   | 10 (9,11)           | 9 (8,9)    | -12.5  | 5    | 1 (1,2)                  | 2 (2,2) | 38.1   | 19   | 44 (40,47)          | 52 (45,60) | 20.1   | 16   |
| Illinois             | 2 (2,2)                  | 2 (2,2) | 10.7   | 17   | 9 (8,10)            | 9 (8,10)   | -0.3   | 24   | 1 (1,1)                  | 2 (1,2) | 36.4   | 16   | 35 (32,37)          | 41 (36,46) | 17.7   | 12   |
| Indiana              | 2 (2,2)                  | 2 (2,2) | 18.2   | 38   | 9 (8,10)            | 9 (8,10)   | 1.1    | 28   | 1 (1,1)                  | 2 (2,2) | 54.7   | 38   | 36 (33,39)          | 50 (44,56) | 39.5   | 39   |
| Iowa                 | 2 (2,2)                  | 2 (2,2) | 13.3   | 21   | 9 (8,10)            | 7 (7,8)    | -20.3  | 1    | 1 (1,1)                  | 2 (2,2) | 53.7   | 37   | 37 (34,40)          | 50 (43,56) | 35.6   | 35   |
| Kansas               | 2 (2,2)                  | 2 (2,2) | 19.1   | 40   | 9 (8,10)            | 9 (8,9)    | -3     | 15   | 1 (1,1)                  | 2 (2,2) | 56.5   | 40   | 37 (34,40)          | 51 (44,57) | 37.8   | 38   |
| Kentucky             | 2 (2,2)                  | 2 (2,2) | 23.9   | 50   | 8 (7,9)             | 9 (8,9)    | 8.2    | 43   | 1 (1,1)                  | 2 (2,2) | 63.1   | 48   | 33 (31,37)          | 48 (42,55) | 44.3   | 46   |
| Louisiana            | 2 (2,2)                  | 2 (2,2) | 16.1   | 33   | 8 (7,9)             | 9 (9,10)   | 13.8   | 48   | 1 (1,1)                  | 2 (1,2) | 45.2   | 27   | 34 (31,37)          | 45 (40,52) | 34.8   | 33   |
| Maine                | 2 (2,2)                  | 2 (2,2) | 15.3   | 30   | 10 (9,11)           | 9 (9,10)   | -5.2   | 12   | 1 (1,2)                  | 2 (2,3) | 53.3   | 36   | 41 (38,44)          | 59 (51,68) | 43.1   | 43   |
| Maryland             | 2 (2,2)                  | 2 (2,2) | 19.4   | 41   | 11 (9,12)           | 11 (10,12) | 2.3    | 33   | 1 (1,1)                  | 2 (1,2) | 37.4   | 17   | 36 (34,39)          | 44 (39,50) | 22.6   | 19   |
| Massachusetts        | 2 (2,2)                  | 2 (2,2) | 10.7   | 16   | 11 (10,12)          | 11 (10,11) | -1.4   | 21   | 1 (1,1)                  | 2 (2,2) | 38.8   | 20   | 38 (35,40)          | 47 (41,53) | 24.3   | 22   |
| Michigan             | 2 (2,2)                  | 2 (2,2) | 15.1   | 29   | 9 (8,10)            | 9 (9,10)   | 1.7    | 30   | 1 (1,1)                  | 2 (2,2) | 47.5   | 32   | 37 (35,40)          | 49 (43,55) | 31.1   | 32   |
| Minnesota            | 2 (2,2)                  | 3 (2,3) | 16.2   | 34   | 12 (10,13)          | 11 (11,12) | -1.1   | 22   | 2 (1,2)                  | 2 (2,2) | 42.7   | 23   | 43 (40,47)          | 55 (48,63) | 27.3   | 27   |
| Mississippi          | 1 (1,2)                  | 2 (2,2) | 16.6   | 37   | 6 (6,7)             | 6 (6,7)    | 1      | 27   | 1 (1,1)                  | 1 (1,2) | 56.3   | 39   | 30 (27,33)          | 43 (37,49) | 42.6   | 42   |
| Missouri             | 2 (2,2)                  | 2 (2,2) | 19.6   | 42   | 8 (7,9)             | 8 (8,9)    | 0.6    | 25   | 1 (1,1)                  | 2 (2,2) | 53.2   | 35   | 35 (33,38)          | 47 (41,54) | 35.2   | 34   |
| Montana              | 2 (2,2)                  | 2 (2,2) | 15.8   | 31   | 9 (8,10)            | 8 (7,8)    | -13.8  | 3    | 1 (1,2)                  | 2 (2,3) | 66.5   | 50   | 43 (39,48)          | 63 (54,72) | 48.1   | 48   |
| Nebraska             | 2 (2,2)                  | 2 (2,2) | 12.9   | 20   | 9 (8,10)            | 8 (7,8)    | -14.8  | 2    | 1 (1,1)                  | 2 (2,2) | 45.6   | 29   | 38 (35,41)          | 48 (42,55) | 28.6   | 28   |

|                |         |         |      |    |            |            |       |    |         |         |      |    |            |            |      |    |
|----------------|---------|---------|------|----|------------|------------|-------|----|---------|---------|------|----|------------|------------|------|----|
| Nevada         | 1 (1,2) | 2 (1,2) | 4.6  | 3  | 7 (7,8)    | 7 (6,8)    | -5.8  | 10 | 1 (1,1) | 1 (1,1) | 24.1 | 5  | 29 (27,32) | 32 (28,36) | 9.6  | 5  |
| New Hampshire  | 2 (2,2) | 2 (2,2) | 10.6 | 14 | 11 (10,12) | 10 (10,11) | -1.9  | 18 | 1 (1,2) | 2 (2,2) | 33.2 | 13 | 40 (37,43) | 48 (42,54) | 21.2 | 17 |
| New Jersey     | 2 (2,2) | 2 (2,2) | 7.6  | 8  | 7 (7,8)    | 8 (7,9)    | 9.7   | 46 | 1 (1,1) | 1 (1,1) | 16.2 | 2  | 33 (31,36) | 34 (30,39) | 3.3  | 4  |
| New Mexico     | 1 (1,2) | 2 (2,2) | 15   | 28 | 8 (7,8)    | 7 (7,8)    | -3.6  | 14 | 1 (1,1) | 2 (1,2) | 51.1 | 33 | 32 (29,35) | 43 (37,49) | 36.6 | 37 |
| New York       | 2 (1,2) | 2 (2,2) | 7.2  | 6  | 9 (8,10)   | 10 (9,11)  | 7.6   | 41 | 1 (1,1) | 1 (1,1) | 18.5 | 4  | 32 (30,35) | 33 (29,37) | 2.1  | 3  |
| North Carolina | 2 (2,2) | 2 (2,2) | 13.5 | 23 | 9 (8,10)   | 9 (8,10)   | 2.1   | 32 | 1 (1,1) | 2 (1,2) | 40.3 | 21 | 35 (33,38) | 43 (38,49) | 22.6 | 18 |
| North Dakota   | 2 (2,2) | 2 (2,3) | 23.4 | 49 | 11 (10,12) | 12 (11,14) | 15.2  | 49 | 1 (1,1) | 2 (2,2) | 63.5 | 49 | 39 (36,43) | 59 (53,67) | 51   | 50 |
| Ohio           | 2 (2,2) | 2 (2,2) | 18.7 | 39 | 9 (8,10)   | 9 (9,10)   | 1.9   | 31 | 1 (1,1) | 2 (2,2) | 58.7 | 42 | 37 (34,40) | 52 (45,59) | 40.5 | 40 |
| Oklahoma       | 2 (2,2) | 2 (2,2) | 21.5 | 44 | 8 (7,8)    | 8 (7,8)    | 1.7   | 29 | 1 (1,1) | 2 (2,2) | 61.9 | 45 | 34 (31,37) | 49 (43,56) | 45.8 | 47 |
| Oregon         | 2 (2,2) | 2 (2,3) | 14.5 | 27 | 10 (9,11)  | 10 (9,10)  | -5.4  | 11 | 1 (1,2) | 2 (2,2) | 45.3 | 28 | 45 (41,50) | 57 (49,64) | 26.9 | 25 |
| Pennsylvania   | 2 (2,2) | 2 (2,2) | 22.9 | 48 | 10 (9,12)  | 12 (11,13) | 13.5  | 47 | 1 (1,1) | 2 (2,2) | 46.6 | 31 | 36 (33,38) | 46 (40,52) | 29.1 | 29 |
| Rhode Island   | 2 (2,2) | 2 (2,2) | 7.7  | 9  | 9 (8,10)   | 8 (7,8)    | -13.5 | 4  | 1 (1,1) | 2 (1,2) | 30.4 | 10 | 37 (34,40) | 43 (38,49) | 17   | 11 |
| South Carolina | 2 (2,2) | 2 (2,2) | 16.4 | 35 | 8 (7,9)    | 8 (8,9)    | 4.6   | 37 | 1 (1,1) | 2 (1,2) | 52.3 | 34 | 35 (32,38) | 45 (39,51) | 30.5 | 31 |
| South Dakota   | 2 (2,2) | 2 (2,2) | 14.4 | 26 | 9 (8,10)   | 8 (7,9)    | -9.8  | 6  | 1 (1,1) | 2 (2,2) | 59   | 43 | 40 (37,45) | 57 (49,64) | 42.4 | 41 |
| Tennessee      | 2 (2,2) | 2 (2,2) | 19.7 | 43 | 8 (7,9)    | 8 (7,9)    | 2.8   | 35 | 1 (1,1) | 2 (1,2) | 56.8 | 41 | 34 (31,37) | 46 (40,53) | 36.5 | 36 |
| Texas          | 2 (2,2) | 2 (2,2) | 9.4  | 10 | 8 (8,9)    | 9 (8,10)   | 5.9   | 39 | 1 (1,1) | 1 (1,2) | 26.9 | 7  | 32 (30,34) | 37 (32,41) | 12.9 | 6  |
| Utah           | 2 (2,2) | 2 (2,2) | 11.9 | 18 | 10 (9,11)  | 9 (9,10)   | -7.5  | 9  | 1 (1,2) | 2 (2,2) | 45.7 | 30 | 41 (38,44) | 53 (46,60) | 29.7 | 30 |
| Vermont        | 2 (2,2) | 3 (2,3) | 13.4 | 22 | 13 (12,14) | 15 (14,17) | 17.2  | 50 | 2 (2,2) | 2 (2,2) | 26.5 | 6  | 47 (43,50) | 55 (49,61) | 18.1 | 13 |
| Virginia       | 2 (2,2) | 2 (2,2) | 5.7  | 4  | 9 (8,10)   | 8 (7,9)    | -9.7  | 7  | 1 (1,1) | 2 (1,2) | 30.9 | 11 | 37 (34,39) | 42 (37,48) | 15.9 | 10 |
| Washington     | 2 (2,2) | 3 (2,3) | 10.6 | 15 | 12 (11,14) | 11 (10,12) | -8.4  | 8  | 2 (1,2) | 2 (2,2) | 33.5 | 14 | 45 (42,49) | 52 (45,59) | 15.2 | 9  |
| West Virginia  | 2 (2,2) | 2 (2,2) | 22.4 | 45 | 8 (7,9)    | 9 (8,9)    | 9.5   | 45 | 1 (1,1) | 2 (2,2) | 61.8 | 44 | 34 (31,38) | 48 (42,56) | 43.4 | 44 |
| Wisconsin      | 2 (2,2) | 2 (2,2) | 16.6 | 36 | 10 (9,11)  | 10 (9,11)  | -2.8  | 16 | 1 (1,1) | 2 (2,2) | 43.1 | 24 | 41 (38,44) | 52 (45,58) | 27.2 | 26 |

eTable 7. Age-adjusted incidence, prevalence, mortality, and disability-adjusted life years (DALY) rates per 100,000 for migraine by US states in 1990 and 2017, and the percentage change between 1990 and 2017

| Location             | Incidence rates (95% UI) |                  |        |      | Prevalence (95% UI) |                     |        |      | Mortality rates (95% UI) |      |        |      | DALY rates (95% UI) |                |        |      |
|----------------------|--------------------------|------------------|--------|------|---------------------|---------------------|--------|------|--------------------------|------|--------|------|---------------------|----------------|--------|------|
|                      | 1990                     | 2017             | Change | Rank | 1990                | 2017                | Change | Rank | 1990                     | 2017 | Change | Rank | 1990                | 2017           | Change | Rank |
| Alabama              | 1718 (1562,1866)         | 1739 (1594,1881) | 1.2    | 20   | 20238 (18787,21800) | 20451 (18925,22012) | 1.1    | 19   | -                        | -    | -      | -    | 705 (451,1030)      | 711 (454,1021) | 0.8    | 11   |
| Alaska               | 1679 (1526,1821)         | 1709 (1566,1850) | 1.8    | 47   | 19555 (18137,21092) | 19926 (18439,21449) | 1.9    | 49   | -                        | -    | -      | -    | 680 (432,989)       | 695 (443,1001) | 2.2    | 48   |
| Arizona              | 1705 (1549,1850)         | 1733 (1588,1874) | 1.6    | 44   | 20030 (18594,21583) | 20346 (18827,21900) | 1.6    | 44   | -                        | -    | -      | -    | 696 (446,1009)      | 708 (450,1018) | 1.7    | 41   |
| Arkansas             | 1714 (1559,1863)         | 1735 (1590,1876) | 1.2    | 17   | 20188 (18741,21750) | 20378 (18857,21934) | 0.9    | 13   | -                        | -    | -      | -    | 704 (456,1024)      | 711 (452,1020) | 0.9    | 13   |
| California           | 1696 (1542,1841)         | 1729 (1584,1870) | 1.9    | 49   | 19921 (18493,21468) | 20287 (18774,21835) | 1.8    | 48   | -                        | -    | -      | -    | 696 (445,1004)      | 712 (451,1028) | 2.3    | 50   |
| Colorado             | 1704 (1549,1850)         | 1729 (1584,1870) | 1.4    | 30   | 20021 (18583,21576) | 20277 (18761,21826) | 1.3    | 32   | -                        | -    | -      | -    | 698 (445,1009)      | 710 (448,1020) | 1.7    | 40   |
| Connecticut          | 1710 (1555,1857)         | 1733 (1588,1875) | 1.3    | 27   | 20121 (18679,21681) | 20372 (18854,21925) | 1.2    | 29   | -                        | -    | -      | -    | 702 (444,1016)      | 711 (450,1036) | 1.2    | 26   |
| Delaware             | 1716 (1560,1864)         | 1742 (1597,1883) | 1.5    | 38   | 20174 (18727,21738) | 20492 (18968,22052) | 1.6    | 43   | -                        | -    | -      | -    | 703 (448,1022)      | 714 (455,1025) | 1.5    | 32   |
| District of Columbia | 1730 (1573,1881)         | 1756 (1613,1899) | 1.5    | 40   | 20403 (18943,21976) | 20644 (19098,22227) | 1.2    | 25   | -                        | -    | -      | -    | 712 (455,1033)      | 726 (462,1051) | 2      | 46   |
| Florida              | 1709 (1554,1856)         | 1735 (1590,1876) | 1.5    | 34   | 20113 (18673,21669) | 20385 (18865,21942) | 1.4    | 35   | -                        | -    | -      | -    | 700 (449,1018)      | 710 (451,1029) | 1.4    | 31   |
| Georgia              | 1713 (1557,1860)         | 1743 (1598,1885) | 1.7    | 45   | 20172 (18725,21732) | 20525 (18992,22095) | 1.8    | 46   | -                        | -    | -      | -    | 704 (451,1023)      | 717 (456,1033) | 1.9    | 44   |
| Hawaii               | 1691 (1536,1835)         | 1722 (1577,1863) | 1.8    | 48   | 19838 (18415,21379) | 20184 (18675,21723) | 1.7    | 45   | -                        | -    | -      | -    | 695 (443,1011)      | 710 (453,1028) | 2.1    | 47   |
| Idaho                | 1704 (1549,1850)         | 1730 (1586,1871) | 1.5    | 39   | 19987 (18548,21543) | 20285 (18770,21832) | 1.5    | 40   | -                        | -    | -      | -    | 697 (443,1017)      | 709 (451,1031) | 1.6    | 37   |
| Illinois             | 1709 (1554,1856)         | 1734 (1590,1876) | 1.5    | 31   | 20121 (18679,21678) | 20375 (18854,21930) | 1.3    | 30   | -                        | -    | -      | -    | 703 (447,1020)      | 713 (454,1028) | 1.4    | 30   |
| Indiana              | 1712 (1556,1859)         | 1734 (1589,1876) | 1.3    | 25   | 20144 (18699,21705) | 20362 (18841,21917) | 1.1    | 20   | -                        | -    | -      | -    | 702 (447,1016)      | 707 (448,1015) | 0.7    | 9    |
| Iowa                 | 1710 (1554,1856)         | 1727 (1583,1869) | 1      | 6    | 20094 (18652,21653) | 20246 (18734,21790) | 0.8    | 6    | -                        | -    | -      | -    | 704 (446,1024)      | 709 (451,1023) | 0.8    | 10   |
| Kansas               | 1704 (1549,1850)         | 1729 (1584,1870) | 1.5    | 32   | 20022 (18585,21576) | 20281 (18765,21829) | 1.3    | 33   | -                        | -    | -      | -    | 699 (450,1011)      | 709 (447,1018) | 1.4    | 29   |
| Kentucky             | 1712 (1557,1860)         | 1731 (1587,1873) | 1.1    | 12   | 20159 (18714,21718) | 20323 (18807,21873) | 0.8    | 7    | -                        | -    | -      | -    | 701 (446,1013)      | 702 (448,1010) | 0.2    | 3    |
| Louisiana            | 1719 (1563,1868)         | 1734 (1589,1875) | 0.9    | 5    | 20249 (18799,21814) | 20357 (18841,21907) | 0.5    | 4    | -                        | -    | -      | -    | 704 (449,1015)      | 707 (452,1021) | 0.3    | 5    |
| Maine                | 1710 (1555,1857)         | 1732 (1587,1873) | 1.3    | 23   | 20097 (18651,21654) | 20347 (18828,21899) | 1.2    | 28   | -                        | -    | -      | -    | 702 (443,1017)      | 710 (453,1022) | 1.2    | 24   |
| Maryland             | 1711 (1573,1843)         | 1726 (1574,1871) | 0.9    | 4    | 20027 (18695,21404) | 20206 (18649,21805) | 0.9    | 11   | -                        | -    | -      | -    | 705 (448,1016)      | 713 (457,1035) | 1.1    | 20   |
| Massachusetts        | 1714 (1558,1862)         | 1740 (1595,1882) | 1.5    | 36   | 20179 (18731,21741) | 20460 (18935,22021) | 1.4    | 37   | -                        | -    | -      | -    | 704 (451,1016)      | 716 (451,1035) | 1.7    | 42   |
| Michigan             | 1480 (1334,1627)         | 1488 (1337,1646) | 0.5    | 2    | 16810 (15267,18453) | 16862 (15259,18507) | 0.3    | 2    | -                        | -    | -      | -    | 583 (366,860)       | 584 (367,860)  | 0.2    | 4    |
| Minnesota            | 1709 (1553,1856)         | 1731 (1586,1872) | 1.3    | 26   | 20057 (18615,21616) | 20292 (18775,21841) | 1.2    | 24   | -                        | -    | -      | -    | 704 (448,1024)      | 715 (457,1039) | 1.6    | 36   |
| Mississippi          | 1720 (1565,1869)         | 1739 (1594,1881) | 1.1    | 9    | 20285 (18832,21849) | 20458 (18933,22020) | 0.9    | 8    | -                        | -    | -      | -    | 710 (455,1037)      | 717 (457,1035) | 0.9    | 16   |
| Missouri             | 1714 (1558,1862)         | 1734 (1589,1875) | 1.2    | 15   | 20173 (18727,21736) | 20364 (18843,21918) | 0.9    | 14   | -                        | -    | -      | -    | 703 (446,1020)      | 710 (449,1026) | 0.9    | 15   |
| Montana              | 1706 (1551,1852)         | 1724 (1579,1865) | 1.1    | 8    | 20008 (18567,21564) | 20186 (18678,21726) | 0.9    | 10   | -                        | -    | -      | -    | 698 (451,1008)      | 704 (444,1020) | 0.9    | 14   |
| Nebraska             | 1709 (1553,1856)         | 1729 (1584,1870) | 1.2    | 14   | 20073 (18631,21632) | 20267 (18752,21813) | 1      | 16   | -                        | -    | -      | -    | 702 (445,1021)      | 710 (450,1019) | 1.1    | 22   |

|                |                  |                  |     |    |                     |                     |     |    |   |   |   |   |                |                |      |    |
|----------------|------------------|------------------|-----|----|---------------------|---------------------|-----|----|---|---|---|---|----------------|----------------|------|----|
| Nevada         | 1696 (1542,1841) | 1730 (1585,1871) | 2   | 50 | 19820 (18391,21372) | 20265 (18748,21816) | 2.2 | 50 | - | - | - | - | 690 (443,996)  | 705 (449,1024) | 2.2  | 49 |
| New Hampshire  | 1710 (1555,1857) | 1732 (1588,1874) | 1.3 | 24 | 20071 (18626,21633) | 20319 (18801,21869) | 1.2 | 27 | - | - | - | - | 701 (444,1015) | 709 (450,1021) | 1.1  | 21 |
| New Jersey     | 1712 (1556,1859) | 1733 (1589,1875) | 1.3 | 22 | 20151 (18707,21711) | 20384 (18865,21936) | 1.2 | 22 | - | - | - | - | 703 (450,1019) | 712 (455,1030) | 1.3  | 27 |
| New Mexico     | 1711 (1555,1858) | 1730 (1586,1872) | 1.1 | 11 | 20103 (18660,21662) | 20303 (18791,21849) | 1   | 18 | - | - | - | - | 700 (447,1021) | 707 (452,1014) | 1    | 17 |
| New York       | 1715 (1559,1863) | 1738 (1593,1880) | 1.3 | 28 | 20216 (18770,21778) | 20451 (18927,22012) | 1.2 | 23 | - | - | - | - | 703 (451,1023) | 712 (452,1033) | 1.3  | 28 |
| North Carolina | 1709 (1554,1856) | 1740 (1595,1882) | 1.8 | 46 | 20132 (18690,21688) | 20487 (18956,22054) | 1.8 | 47 | - | - | - | - | 704 (450,1016) | 717 (455,1039) | 1.9  | 45 |
| North Dakota   | 1698 (1543,1843) | 1717 (1572,1857) | 1.1 | 10 | 19914 (18482,21461) | 20059 (18563,21589) | 0.7 | 5  | - | - | - | - | 697 (446,1013) | 702 (446,1013) | 0.7  | 7  |
| Ohio           | 1715 (1560,1864) | 1735 (1590,1877) | 1.1 | 13 | 20195 (18748,21758) | 20384 (18862,21940) | 0.9 | 12 | - | - | - | - | 703 (448,1018) | 708 (452,1018) | 0.7  | 8  |
| Oklahoma       | 1708 (1553,1855) | 1729 (1585,1871) | 1.2 | 21 | 20100 (18660,21658) | 20290 (18775,21838) | 0.9 | 15 | - | - | - | - | 699 (443,1013) | 704 (448,1015) | 0.7  | 6  |
| Oregon         | 1707 (1551,1853) | 1733 (1588,1874) | 1.5 | 42 | 20040 (18599,21597) | 20341 (18821,21896) | 1.5 | 41 | - | - | - | - | 700 (447,1016) | 712 (452,1031) | 1.7  | 39 |
| Pennsylvania   | 1610 (1461,1757) | 1617 (1468,1772) | 0.5 | 1  | 18617 (17174,20208) | 18621 (17130,20242) | 0   | 1  | - | - | - | - | 648 (412,945)  | 646 (412,928)  | -0.4 | 1  |
| Rhode Island   | 1712 (1556,1860) | 1738 (1593,1879) | 1.5 | 35 | 20160 (18714,21719) | 20438 (18917,21993) | 1.4 | 36 | - | - | - | - | 703 (448,1021) | 714 (456,1033) | 1.5  | 33 |
| South Carolina | 1713 (1557,1860) | 1737 (1592,1879) | 1.4 | 29 | 20170 (18724,21728) | 20425 (18904,21983) | 1.3 | 31 | - | - | - | - | 702 (446,1020) | 711 (450,1025) | 1.2  | 25 |
| South Dakota   | 1706 (1550,1852) | 1724 (1579,1865) | 1   | 7  | 20005 (18566,21560) | 20181 (18674,21719) | 0.9 | 9  | - | - | - | - | 701 (447,1019) | 707 (450,1030) | 0.9  | 12 |
| Tennessee      | 1714 (1559,1862) | 1740 (1595,1882) | 1.5 | 37 | 20197 (18749,21757) | 20461 (18933,22025) | 1.3 | 34 | - | - | - | - | 704 (449,1019) | 711 (453,1030) | 1.1  | 19 |
| Texas          | 1707 (1552,1853) | 1733 (1589,1875) | 1.5 | 41 | 20066 (18626,21622) | 20360 (18839,21916) | 1.5 | 39 | - | - | - | - | 700 (448,1007) | 712 (454,1024) | 1.6  | 38 |
| Utah           | 1710 (1554,1857) | 1731 (1586,1872) | 1.2 | 18 | 20068 (18625,21629) | 20288 (18773,21835) | 1.1 | 21 | - | - | - | - | 700 (446,1012) | 707 (449,1016) | 1.1  | 18 |
| Vermont        | 1710 (1555,1857) | 1731 (1586,1872) | 1.2 | 19 | 20084 (18639,21644) | 20322 (18803,21872) | 1.2 | 26 | - | - | - | - | 703 (448,1019) | 714 (454,1028) | 1.5  | 35 |
| Virginia       | 1707 (1551,1853) | 1734 (1590,1876) | 1.6 | 43 | 20075 (18635,21631) | 20384 (18863,21940) | 1.5 | 42 | - | - | - | - | 700 (447,1019) | 713 (454,1026) | 1.8  | 43 |
| Washington     | 1703 (1548,1849) | 1728 (1584,1870) | 1.5 | 33 | 19986 (18548,21542) | 20270 (18756,21818) | 1.4 | 38 | - | - | - | - | 698 (444,1014) | 708 (449,1021) | 1.5  | 34 |
| West Virginia  | 1715 (1560,1862) | 1729 (1584,1870) | 0.8 | 3  | 20194 (18744,21755) | 20271 (18756,21817) | 0.4 | 3  | - | - | - | - | 702 (449,1016) | 700 (444,1006) | -0.4 | 2  |
| Wisconsin      | 1709 (1553,1856) | 1729 (1585,1871) | 1.2 | 16 | 20069 (18627,21628) | 20268 (18753,21814) | 1   | 17 | - | - | - | - | 701 (444,1018) | 709 (451,1032) | 1.2  | 23 |

eTable 8. Age-adjusted incidence, prevalence, mortality, and disability-adjusted life years (DALY) rates per 100,000 for tension-type headache by US states in 1990 and 2017, and the percentage change between 1990 and 2017

| Location             | Incidence rates (95% UI) |                     |        |      | Prevalence (95% UI) |                     |        |      | Mortality rates (95% UI) |      |        |      | DALY rates (95% UI) |             |        |      |
|----------------------|--------------------------|---------------------|--------|------|---------------------|---------------------|--------|------|--------------------------|------|--------|------|---------------------|-------------|--------|------|
|                      | 1990                     | 2017                | Change | Rank | 1990                | 2017                | Change | Rank | 1990                     | 2017 | Change | Rank | 1990                | 2017        | Change | Rank |
| Alabama              | 12968 (11498,14380)      | 13017 (11606,14432) | 0.4    | 21   | 34481 (31168,38243) | 34653 (31355,38117) | 0.5    | 22.5 | -                        | -    | -      | -    | 97 (55,154)         | 96 (54,154) | -0.2   | 7    |
| Alaska               | 12951 (11486,14364)      | 13003 (11587,14423) | 0.4    | 46   | 34435 (31115,38195) | 34611 (31320,38081) | 0.5    | 36   | -                        | -    | -      | -    | 95 (53,154)         | 96 (54,154) | 0.6    | 50   |
| Arizona              | 12963 (11493,14374)      | 13013 (11603,14431) | 0.4    | 43   | 34465 (31148,38228) | 34643 (31347,38105) | 0.5    | 43   | -                        | -    | -      | -    | 96 (54,155)         | 96 (55,154) | 0.1    | 27   |
| Arkansas             | 12967 (11496,14378)      | 13015 (11605,14432) | 0.4    | 19   | 34477 (31159,38236) | 34648 (31350,38114) | 0.5    | 18   | -                        | -    | -      | -    | 97 (54,155)         | 97 (54,154) | -0.1   | 9    |
| California           | 12961 (11496,14373)      | 13013 (11601,14432) | 0.4    | 48   | 34462 (31147,38224) | 34641 (31343,38109) | 0.5    | 47   | -                        | -    | -      | -    | 96 (55,153)         | 97 (54,154) | 0.4    | 48   |
| Colorado             | 12963 (11494,14376)      | 13012 (11600,14431) | 0.4    | 24   | 34468 (31152,38227) | 34639 (31340,38104) | 0.5    | 21   | -                        | -    | -      | -    | 96 (54,154)         | 97 (54,153) | 0.3    | 45   |
| Connecticut          | 12966 (11497,14378)      | 13015 (11605,14434) | 0.4    | 33   | 34474 (31159,38234) | 34649 (31351,38115) | 0.5    | 35   | -                        | -    | -      | -    | 97 (55,155)         | 97 (54,155) | 0.1    | 26   |
| Delaware             | 12967 (11495,14380)      | 13017 (11608,14434) | 0.4    | 40   | 34475 (31160,38239) | 34654 (31360,38114) | 0.5    | 45   | -                        | -    | -      | -    | 97 (54,156)         | 97 (55,154) | 0.2    | 33   |
| District of Columbia | 12973 (11501,14386)      | 13021 (11617,14431) | 0.4    | 18   | 34491 (31184,38255) | 34665 (31361,38129) | 0.5    | 29   | -                        | -    | -      | -    | 97 (55,154)         | 97 (54,157) | 0.5    | 49   |
| Florida              | 12965 (11494,14376)      | 13014 (11604,14431) | 0.4    | 37   | 34470 (31153,38233) | 34647 (31351,38110) | 0.5    | 41   | -                        | -    | -      | -    | 96 (54,153)         | 96 (54,153) | 0.1    | 20   |
| Georgia              | 12967 (11499,14379)      | 13018 (11608,14431) | 0.4    | 44   | 34479 (31166,38241) | 34659 (31362,38120) | 0.5    | 46   | -                        | -    | -      | -    | 97 (55,154)         | 97 (55,155) | 0.3    | 44   |
| Hawaii               | 12956 (11488,14366)      | 13010 (11598,14433) | 0.4    | 50   | 34450 (31129,38217) | 34634 (31336,38101) | 0.5    | 49   | -                        | -    | -      | -    | 96 (54,155)         | 97 (55,155) | 0.4    | 47   |
| Idaho                | 12961 (11490,14373)      | 13012 (11600,14432) | 0.4    | 45   | 34461 (31142,38223) | 34639 (31340,38104) | 0.5    | 44   | -                        | -    | -      | -    | 96 (54,155)         | 97 (54,154) | 0.3    | 41   |
| Illinois             | 12966 (11498,14378)      | 13015 (11604,14431) | 0.4    | 27   | 34476 (31162,38235) | 34648 (31348,38115) | 0.5    | 22.5 | -                        | -    | -      | -    | 97 (54,155)         | 97 (55,154) | 0.2    | 39   |
| Indiana              | 12967 (11497,14379)      | 13015 (11603,14431) | 0.4    | 15.5 | 34477 (31163,38237) | 34647 (31347,38114) | 0.5    | 15   | -                        | -    | -      | -    | 96 (54,155)         | 96 (55,153) | -0.1   | 8    |
| Iowa                 | 12965 (11495,14377)      | 13012 (11600,14432) | 0.4    | 3    | 34473 (31159,38234) | 34638 (31336,38106) | 0.5    | 4    | -                        | -    | -      | -    | 97 (55,156)         | 97 (55,154) | 0      | 16   |
| Kansas               | 12964 (11496,14376)      | 13012 (11600,14431) | 0.4    | 22   | 34469 (31157,38231) | 34640 (31339,38108) | 0.5    | 17   | -                        | -    | -      | -    | 96 (55,154)         | 97 (54,155) | 0.1    | 31   |
| Kentucky             | 12967 (11497,14378)      | 13014 (11603,14432) | 0.4    | 7    | 34478 (31163,38236) | 34645 (31343,38113) | 0.5    | 6    | -                        | -    | -      | -    | 96 (54,155)         | 96 (54,153) | -0.5   | 2    |
| Louisiana            | 12968 (11496,14380)      | 13015 (11604,14433) | 0.4    | 5    | 34481 (31167,38240) | 34647 (31344,38118) | 0.5    | 5    | -                        | -    | -      | -    | 96 (54,154)         | 96 (55,155) | -0.3   | 5    |
| Maine                | 12965 (11495,14377)      | 13015 (11604,14434) | 0.4    | 35   | 34473 (31157,38230) | 34647 (31350,38112) | 0.5    | 32   | -                        | -    | -      | -    | 97 (55,155)         | 97 (54,155) | 0.1    | 19   |
| Maryland             | 12941 (11519,14318)      | 12975 (11526,14352) | 0.3    | 1    | 34281 (30987,37800) | 34412 (31086,38237) | 0.4    | 1    | -                        | -    | -      | -    | 96 (54,153)         | 96 (54,154) | 0.2    | 36   |
| Massachusetts        | 12968 (11498,14381)      | 13017 (11607,14433) | 0.4    | 31   | 34479 (31167,38242) | 34654 (31356,38119) | 0.5    | 34   | -                        | -    | -      | -    | 97 (55,154)         | 97 (55,156) | 0.2    | 37   |
| Michigan             | 12967 (11496,14378)      | 13015 (11604,14432) | 0.4    | 20   | 34476 (31160,38235) | 34648 (31351,38112) | 0.5    | 24   | -                        | -    | -      | -    | 97 (54,154)         | 96 (54,155) | -0.1   | 10   |
| Minnesota            | 12965 (11494,14377)      | 13012 (11600,14431) | 0.4    | 14   | 34469 (31154,38231) | 34639 (31338,38107) | 0.5    | 16   | -                        | -    | -      | -    | 97 (55,154)         | 97 (55,155) | 0.2    | 35   |
| Mississippi          | 12969 (11497,14380)      | 13017 (11607,14433) | 0.4    | 17   | 34484 (31170,38245) | 34655 (31355,38122) | 0.5    | 19.5 | -                        | -    | -      | -    | 97 (55,154)         | 97 (55,154) | 0.1    | 22   |
| Missouri             | 12967 (11497,14379)      | 13015 (11604,14432) | 0.4    | 12   | 34478 (31163,38238) | 34647 (31348,38114) | 0.5    | 14   | -                        | -    | -      | -    | 97 (54,154)         | 96 (54,154) | -0.1   | 11   |
| Montana              | 12962 (11491,14373)      | 13009 (11598,14432) | 0.4    | 9    | 34464 (31143,38219) | 34631 (31338,38098) | 0.5    | 8    | -                        | -    | -      | -    | 96 (54,154)         | 96 (54,153) | 0.1    | 21   |
| Nebraska             | 12965 (11495,14376)      | 13012 (11600,14432) | 0.4    | 15.5 | 34471 (31156,38232) | 34639 (31339,38106) | 0.5    | 11   | -                        | -    | -      | -    | 97 (54,154)         | 97 (54,155) | 0.2    | 32   |



|                |                     |                     |     |    |                     |                     |     |      |   |   |   |   |             |             |      |    |
|----------------|---------------------|---------------------|-----|----|---------------------|---------------------|-----|------|---|---|---|---|-------------|-------------|------|----|
| Nevada         | 12958 (11491,14371) | 13011 (11599,14429) | 0.4 | 49 | 34448 (31127,38214) | 34636 (31338,38101) | 0.5 | 50   | - | - | - | - | 96 (53,154) | 96 (54,154) | 0.2  | 34 |
| New Hampshire  | 12965 (11494,14378) | 13012 (11601,14432) | 0.4 | 10 | 34470 (31155,38230) | 34641 (31342,38106) | 0.5 | 19.5 | - | - | - | - | 96 (54,153) | 96 (55,155) | 0.1  | 30 |
| New Jersey     | 12967 (11498,14379) | 13015 (11606,14434) | 0.4 | 29 | 34477 (31163,38237) | 34650 (31351,38116) | 0.5 | 30   | - | - | - | - | 97 (54,154) | 97 (54,155) | 0.1  | 23 |
| New Mexico     | 12964 (11492,14375) | 13013 (11602,14432) | 0.4 | 34 | 34467 (31148,38227) | 34641 (31342,38108) | 0.5 | 33   | - | - | - | - | 96 (54,155) | 96 (54,155) | -0.1 | 12 |
| New York       | 12968 (11499,14380) | 13017 (11607,14433) | 0.4 | 28 | 34481 (31169,38242) | 34655 (31358,38122) | 0.5 | 31   | - | - | - | - | 97 (54,154) | 96 (54,154) | -0.1 | 13 |
| North Carolina | 12966 (11498,14378) | 13017 (11606,14431) | 0.4 | 47 | 34476 (31163,38240) | 34656 (31359,38118) | 0.5 | 48   | - | - | - | - | 97 (54,154) | 97 (54,156) | 0.4  | 46 |
| North Dakota   | 12960 (11493,14372) | 13007 (11594,14431) | 0.4 | 4  | 34461 (31145,38222) | 34623 (31331,38097) | 0.5 | 3    | - | - | - | - | 96 (54,155) | 96 (54,155) | 0    | 15 |
| Ohio           | 12968 (11497,14380) | 13015 (11604,14432) | 0.4 | 11 | 34479 (31165,38238) | 34649 (31350,38115) | 0.5 | 12   | - | - | - | - | 96 (55,155) | 96 (54,153) | -0.2 | 6  |
| Oklahoma       | 12965 (11496,14377) | 13013 (11601,14431) | 0.4 | 13 | 34474 (31158,38233) | 34642 (31341,38111) | 0.5 | 10   | - | - | - | - | 96 (54,155) | 96 (54,153) | -0.3 | 4  |
| Oregon         | 12963 (11493,14375) | 13014 (11602,14431) | 0.4 | 42 | 34466 (31147,38226) | 34644 (31346,38107) | 0.5 | 42   | - | - | - | - | 97 (55,155) | 97 (54,154) | 0.2  | 38 |
| Pennsylvania   | 12968 (11498,14380) | 13014 (11604,14432) | 0.4 | 6  | 34479 (31167,38240) | 34646 (31346,38114) | 0.5 | 7    | - | - | - | - | 97 (54,154) | 96 (53,153) | -0.4 | 3  |
| Rhode Island   | 12968 (11498,14380) | 13017 (11607,14435) | 0.4 | 38 | 34478 (31168,38241) | 34654 (31354,38121) | 0.5 | 38   | - | - | - | - | 97 (54,155) | 97 (54,155) | 0.1  | 29 |
| South Carolina | 12966 (11497,14378) | 13015 (11605,14432) | 0.4 | 32 | 34477 (31164,38239) | 34650 (31352,38115) | 0.5 | 28   | - | - | - | - | 96 (54,155) | 96 (54,154) | 0    | 17 |
| South Dakota   | 12962 (11492,14374) | 13010 (11598,14432) | 0.4 | 23 | 34463 (31149,38228) | 34633 (31335,38102) | 0.5 | 13   | - | - | - | - | 97 (54,155) | 97 (54,153) | 0    | 18 |
| Tennessee      | 12968 (11498,14379) | 13016 (11606,14431) | 0.4 | 26 | 34480 (31165,38240) | 34653 (31354,38117) | 0.5 | 27   | - | - | - | - | 97 (55,155) | 96 (54,154) | -0.1 | 14 |
| Texas          | 12964 (11496,14377) | 13014 (11603,14431) | 0.4 | 36 | 34470 (31156,38232) | 34646 (31349,38111) | 0.5 | 37   | - | - | - | - | 96 (54,154) | 97 (54,155) | 0.1  | 28 |
| Utah           | 12964 (11493,14377) | 13013 (11601,14433) | 0.4 | 25 | 34467 (31150,38234) | 34639 (31341,38101) | 0.5 | 26   | - | - | - | - | 96 (54,153) | 96 (54,155) | 0.1  | 25 |
| Vermont        | 12965 (11493,14376) | 13013 (11602,14433) | 0.4 | 30 | 34471 (31154,38228) | 34644 (31346,38110) | 0.5 | 25   | - | - | - | - | 97 (54,155) | 97 (54,154) | 0.3  | 42 |
| Virginia       | 12964 (11496,14377) | 13015 (11604,14431) | 0.4 | 41 | 34471 (31157,38232) | 34648 (31350,38114) | 0.5 | 40   | - | - | - | - | 96 (54,155) | 97 (54,155) | 0.3  | 43 |
| Washington     | 12962 (11493,14375) | 13012 (11601,14431) | 0.4 | 39 | 34463 (31144,38223) | 34639 (31341,38104) | 0.5 | 39   | - | - | - | - | 96 (54,155) | 97 (54,155) | 0.3  | 40 |
| West Virginia  | 12968 (11495,14379) | 13012 (11601,14432) | 0.3 | 2  | 34481 (31166,38237) | 34640 (31337,38107) | 0.5 | 2    | - | - | - | - | 96 (54,154) | 96 (54,154) | -0.7 | 1  |
| Wisconsin      | 12965 (11495,14377) | 13012 (11600,14432) | 0.4 | 8  | 34470 (31156,38231) | 34638 (31336,38107) | 0.5 | 9    | - | - | - | - | 96 (54,155) | 97 (54,155) | 0.1  | 24 |

eTable 9. Age-adjusted incidence, prevalence, mortality, and disability-adjusted life years (DALY) rates per 100,000 for traumatic brain injury by US states in 1990 and 2017, and the percentage change between 1990 and 2017

| Location             | Incidence rates (95% UI) |               |        |      | Prevalence (95% UI) |               |        |      | Mortality rates (95% UI) |      |        |      | DALY rates (95% UI) |      |        |      |
|----------------------|--------------------------|---------------|--------|------|---------------------|---------------|--------|------|--------------------------|------|--------|------|---------------------|------|--------|------|
|                      | 1990                     | 2017          | Change | Rank | 1990                | 2017          | Change | Rank | 1990                     | 2017 | Change | Rank | 1990                | 2017 | Change | Rank |
| Alabama              | 424 (354,510)            | 289 (242,346) | -31.9  | 34   | 724 (689,757)       | 498 (475,522) | -31.1  | 32   | -                        | -    | -      | -    | -                   | -    | -      | -    |
| Alaska               | 519 (436,627)            | 320 (267,386) | -38.3  | 49   | 911 (869,954)       | 551 (525,575) | -39.6  | 48   | -                        | -    | -      | -    | -                   | -    | -      | -    |
| Arizona              | 439 (371,521)            | 310 (259,369) | -29.3  | 47   | 777 (742,810)       | 547 (521,573) | -29.6  | 46   | -                        | -    | -      | -    | -                   | -    | -      | -    |
| Arkansas             | 454 (385,543)            | 354 (297,421) | -22.1  | 50   | 792 (755,829)       | 618 (589,647) | -22    | 50   | -                        | -    | -      | -    | -                   | -    | -      | -    |
| California           | 427 (361,509)            | 310 (258,371) | -27.5  | 46   | 756 (721,790)       | 557 (532,585) | -26.3  | 49   | -                        | -    | -      | -    | -                   | -    | -      | -    |
| Colorado             | 426 (359,511)            | 307 (255,366) | -28    | 45   | 743 (710,776)       | 532 (508,557) | -28.4  | 43   | -                        | -    | -      | -    | -                   | -    | -      | -    |
| Connecticut          | 382 (320,460)            | 272 (225,326) | -28.8  | 11   | 671 (640,702)       | 485 (462,508) | -27.7  | 17   | -                        | -    | -      | -    | -                   | -    | -      | -    |
| Delaware             | 386 (324,460)            | 278 (233,332) | -27.9  | 21   | 677 (645,707)       | 495 (472,518) | -26.9  | 26   | -                        | -    | -      | -    | -                   | -    | -      | -    |
| District of Columbia | 412 (346,493)            | 272 (227,326) | -33.9  | 12   | 672 (643,701)       | 474 (452,496) | -29.5  | 9    | -                        | -    | -      | -    | -                   | -    | -      | -    |
| Florida              | 405 (343,479)            | 300 (251,358) | -25.8  | 44   | 718 (686,748)       | 534 (509,560) | -25.6  | 44   | -                        | -    | -      | -    | -                   | -    | -      | -    |
| Georgia              | 424 (356,509)            | 284 (237,338) | -33.1  | 28   | 729 (695,762)       | 498 (474,522) | -31.8  | 30   | -                        | -    | -      | -    | -                   | -    | -      | -    |
| Hawaii               | 365 (308,441)            | 262 (218,312) | -28.3  | 3    | 645 (615,675)       | 468 (447,490) | -27.4  | 6    | -                        | -    | -      | -    | -                   | -    | -      | -    |
| Idaho                | 425 (357,515)            | 283 (235,339) | -33.5  | 26   | 742 (707,774)       | 495 (471,519) | -33.3  | 27   | -                        | -    | -      | -    | -                   | -    | -      | -    |
| Illinois             | 397 (335,473)            | 275 (229,328) | -30.9  | 16   | 694 (662,726)       | 490 (464,514) | -29.5  | 23   | -                        | -    | -      | -    | -                   | -    | -      | -    |
| Indiana              | 393 (328,470)            | 278 (233,332) | -29.1  | 22   | 683 (651,715)       | 489 (465,513) | -28.5  | 21   | -                        | -    | -      | -    | -                   | -    | -      | -    |
| Iowa                 | 390 (326,475)            | 274 (227,330) | -29.6  | 14   | 676 (643,707)       | 472 (448,494) | -30.2  | 8    | -                        | -    | -      | -    | -                   | -    | -      | -    |
| Kansas               | 403 (337,484)            | 286 (238,342) | -28.9  | 31   | 706 (673,738)       | 505 (480,530) | -28.4  | 34   | -                        | -    | -      | -    | -                   | -    | -      | -    |
| Kentucky             | 403 (337,489)            | 286 (239,342) | -29.1  | 30   | 688 (656,718)       | 491 (468,514) | -28.6  | 24   | -                        | -    | -      | -    | -                   | -    | -      | -    |
| Louisiana            | 405 (339,485)            | 283 (237,337) | -30.1  | 27   | 698 (668,729)       | 496 (473,520) | -28.9  | 28   | -                        | -    | -      | -    | -                   | -    | -      | -    |
| Maine                | 364 (304,439)            | 266 (222,319) | -27    | 4    | 631 (602,659)       | 461 (437,483) | -26.9  | 5    | -                        | -    | -      | -    | -                   | -    | -      | -    |
| Maryland             | 410 (346,490)            | 314 (265,375) | -23.4  | 48   | 712 (679,745)       | 548 (522,575) | -23    | 47   | -                        | -    | -      | -    | -                   | -    | -      | -    |
| Massachusetts        | 365 (306,440)            | 270 (225,324) | -26    | 7    | 637 (608,667)       | 480 (457,503) | -24.7  | 13   | -                        | -    | -      | -    | -                   | -    | -      | -    |
| Michigan             | 394 (334,470)            | 294 (248,351) | -25.5  | 37   | 696 (664,727)       | 524 (498,550) | -24.7  | 41   | -                        | -    | -      | -    | -                   | -    | -      | -    |
| Minnesota            | 391 (328,472)            | 275 (228,331) | -29.5  | 17   | 683 (650,713)       | 489 (465,512) | -28.5  | 22   | -                        | -    | -      | -    | -                   | -    | -      | -    |
| Mississippi          | 424 (355,511)            | 288 (241,343) | -32.1  | 32   | 722 (689,756)       | 494 (471,517) | -31.5  | 25   | -                        | -    | -      | -    | -                   | -    | -      | -    |
| Missouri             | 416 (351,501)            | 290 (242,346) | -30.4  | 35   | 718 (685,752)       | 505 (481,528) | -29.6  | 35   | -                        | -    | -      | -    | -                   | -    | -      | -    |
| Montana              | 421 (353,508)            | 298 (248,359) | -29.2  | 42   | 731 (697,763)       | 516 (491,539) | -29.4  | 38   | -                        | -    | -      | -    | -                   | -    | -      | -    |
| Nebraska             | 398 (334,482)            | 288 (241,344) | -27.7  | 33   | 695 (662,726)       | 511 (486,534) | -26.5  | 36   | -                        | -    | -      | -    | -                   | -    | -      | -    |

|                |               |               |       |    |               |               |       |    |   |   |   |   |   |   |   |   |
|----------------|---------------|---------------|-------|----|---------------|---------------|-------|----|---|---|---|---|---|---|---|---|
| Nevada         | 418 (355,497) | 298 (250,354) | -28.7 | 43 | 743 (710,774) | 535 (509,560) | -28   | 45 | - | - | - | - | - | - | - | - |
| New Hampshire  | 371 (310,449) | 271 (225,327) | -26.9 | 9  | 642 (612,671) | 474 (453,497) | -26.1 | 10 | - | - | - | - | - | - | - | - |
| New Jersey     | 370 (311,447) | 276 (230,333) | -25.3 | 19 | 642 (611,672) | 487 (463,511) | -24.1 | 19 | - | - | - | - | - | - | - | - |
| New Mexico     | 431 (363,519) | 297 (248,356) | -31.1 | 41 | 747 (712,780) | 512 (488,537) | -31.4 | 37 | - | - | - | - | - | - | - | - |
| New York       | 377 (317,455) | 245 (205,294) | -34.8 | 1  | 648 (617,677) | 424 (405,444) | -34.7 | 2  | - | - | - | - | - | - | - | - |
| North Carolina | 416 (351,496) | 297 (249,354) | -28.7 | 40 | 731 (697,763) | 529 (505,554) | -27.6 | 42 | - | - | - | - | - | - | - | - |
| North Dakota   | 386 (322,469) | 295 (246,355) | -23.6 | 38 | 671 (639,702) | 519 (492,545) | -22.6 | 40 | - | - | - | - | - | - | - | - |
| Ohio           | 384 (322,463) | 280 (233,335) | -27.2 | 24 | 665 (634,695) | 487 (464,511) | -26.7 | 18 | - | - | - | - | - | - | - | - |
| Oklahoma       | 412 (349,496) | 293 (245,350) | -29   | 36 | 714 (681,746) | 505 (481,529) | -29.3 | 33 | - | - | - | - | - | - | - | - |
| Oregon         | 410 (344,493) | 270 (226,325) | -34.1 | 8  | 717 (683,748) | 479 (455,501) | -33.2 | 12 | - | - | - | - | - | - | - | - |
| Pennsylvania   | 381 (322,460) | 278 (232,333) | -27.2 | 20 | 661 (630,692) | 488 (464,510) | -26.2 | 20 | - | - | - | - | - | - | - | - |
| Rhode Island   | 368 (309,445) | 272 (226,326) | -26.2 | 10 | 636 (608,665) | 478 (456,501) | -24.9 | 11 | - | - | - | - | - | - | - | - |
| South Carolina | 405 (340,484) | 285 (238,341) | -29.6 | 29 | 698 (665,729) | 498 (473,521) | -28.7 | 31 | - | - | - | - | - | - | - | - |
| South Dakota   | 402 (337,486) | 296 (246,353) | -26.4 | 39 | 695 (662,726) | 518 (494,542) | -25.4 | 39 | - | - | - | - | - | - | - | - |
| Tennessee      | 413 (346,496) | 278 (232,333) | -32.6 | 23 | 710 (677,741) | 483 (460,505) | -31.9 | 14 | - | - | - | - | - | - | - | - |
| Texas          | 414 (347,495) | 281 (234,334) | -32.2 | 25 | 721 (687,753) | 497 (472,522) | -31   | 29 | - | - | - | - | - | - | - | - |
| Utah           | 394 (332,474) | 275 (229,329) | -30.3 | 15 | 694 (662,724) | 483 (461,505) | -30.4 | 16 | - | - | - | - | - | - | - | - |
| Vermont        | 384 (321,470) | 266 (221,322) | -30.8 | 5  | 655 (625,686) | 460 (439,482) | -29.8 | 4  | - | - | - | - | - | - | - | - |
| Virginia       | 395 (331,477) | 272 (228,326) | -31.2 | 13 | 684 (652,714) | 483 (461,506) | -29.4 | 15 | - | - | - | - | - | - | - | - |
| Washington     | 391 (329,472) | 246 (203,297) | -37   | 2  | 680 (649,711) | 417 (398,437) | -38.7 | 1  | - | - | - | - | - | - | - | - |
| West Virginia  | 394 (330,474) | 276 (231,332) | -29.9 | 18 | 674 (642,704) | 471 (448,493) | -30.1 | 7  | - | - | - | - | - | - | - | - |
| Wisconsin      | 391 (328,475) | 270 (224,326) | -31.1 | 6  | 673 (643,705) | 458 (436,481) | -32   | 3  | - | - | - | - | - | - | - | - |

eTable 10. Age-adjusted incidence, prevalence, mortality, and disability-adjusted life years (DALY) rates per 100,000 for spinal cord injuries by US states in 1990 and 2017, and the percentage change between 1990 and 2017

| Location             | Incidence rates (95% UI) |            |        |      | Prevalence (95% UI) |               |        |      | Mortality rates (95% UI) |      |        |      | DALY rates (95% UI) |      |        |      |
|----------------------|--------------------------|------------|--------|------|---------------------|---------------|--------|------|--------------------------|------|--------|------|---------------------|------|--------|------|
|                      | 1990                     | 2017       | Change | Rank | 1990                | 2017          | Change | Rank | 1990                     | 2017 | Change | Rank | 1990                | 2017 | Change | Rank |
| Alabama              | 30 (24,37)               | 21 (16,26) | -32    | 30   | 867 (783,966)       | 508 (471,548) | -41.4  | 10   | -                        | -    | -      | -    | -                   | -    | -      | -    |
| Alaska               | 42 (34,51)               | 26 (21,33) | -37.4  | 50   | 1215 (1103,1346)    | 672 (620,728) | -44.6  | 50   | -                        | -    | -      | -    | -                   | -    | -      | -    |
| Arizona              | 33 (27,42)               | 23 (18,30) | -30.2  | 47   | 976 (882,1096)      | 585 (542,629) | -40.1  | 46   | -                        | -    | -      | -    | -                   | -    | -      | -    |
| Arkansas             | 33 (27,40)               | 25 (20,32) | -22.9  | 49   | 951 (864,1057)      | 630 (583,680) | -33.7  | 49   | -                        | -    | -      | -    | -                   | -    | -      | -    |
| California           | 31 (25,38)               | 22 (17,28) | -28.8  | 42   | 919 (834,1032)      | 597 (553,644) | -35.1  | 47   | -                        | -    | -      | -    | -                   | -    | -      | -    |
| Colorado             | 34 (27,43)               | 24 (19,31) | -28.9  | 48   | 1021 (920,1150)     | 622 (573,673) | -39.1  | 48   | -                        | -    | -      | -    | -                   | -    | -      | -    |
| Connecticut          | 28 (23,35)               | 20 (15,25) | -30.9  | 6    | 854 (771,952)       | 528 (484,571) | -38.1  | 26   | -                        | -    | -      | -    | -                   | -    | -      | -    |
| Delaware             | 28 (23,35)               | 20 (16,25) | -30.3  | 9    | 824 (747,915)       | 513 (473,556) | -37.8  | 13   | -                        | -    | -      | -    | -                   | -    | -      | -    |
| District of Columbia | 31 (25,39)               | 20 (16,26) | -36.1  | 15   | 781 (704,872)       | 509 (470,550) | -34.8  | 11   | -                        | -    | -      | -    | -                   | -    | -      | -    |
| Florida              | 30 (24,37)               | 22 (18,28) | -26.3  | 44   | 877 (795,975)       | 574 (529,622) | -34.5  | 44   | -                        | -    | -      | -    | -                   | -    | -      | -    |
| Georgia              | 31 (25,38)               | 20 (16,26) | -34.4  | 22   | 875 (792,971)       | 517 (477,556) | -40.9  | 16   | -                        | -    | -      | -    | -                   | -    | -      | -    |
| Hawaii               | 27 (22,34)               | 19 (15,24) | -30.6  | 1    | 825 (749,919)       | 518 (477,561) | -37.2  | 19   | -                        | -    | -      | -    | -                   | -    | -      | -    |
| Idaho                | 32 (26,39)               | 21 (17,27) | -33.9  | 33   | 946 (859,1055)      | 544 (503,588) | -42.5  | 33   | -                        | -    | -      | -    | -                   | -    | -      | -    |
| Illinois             | 29 (23,36)               | 19 (15,25) | -33.3  | 4    | 850 (772,947)       | 514 (473,555) | -39.6  | 14   | -                        | -    | -      | -    | -                   | -    | -      | -    |
| Indiana              | 29 (23,35)               | 20 (16,25) | -31.2  | 11   | 855 (774,948)       | 507 (469,547) | -40.7  | 8    | -                        | -    | -      | -    | -                   | -    | -      | -    |
| Iowa                 | 31 (24,38)               | 22 (17,28) | -29.3  | 39   | 926 (835,1040)      | 546 (505,592) | -41    | 34   | -                        | -    | -      | -    | -                   | -    | -      | -    |
| Kansas               | 29 (23,36)               | 20 (16,26) | -29.7  | 25   | 873 (793,966)       | 532 (491,575) | -39.1  | 28   | -                        | -    | -      | -    | -                   | -    | -      | -    |
| Kentucky             | 30 (24,37)               | 21 (16,26) | -30.2  | 31   | 859 (774,970)       | 506 (467,546) | -41.1  | 7    | -                        | -    | -      | -    | -                   | -    | -      | -    |
| Louisiana            | 29 (23,35)               | 20 (16,25) | -31.5  | 7    | 811 (734,899)       | 496 (459,537) | -38.8  | 3    | -                        | -    | -      | -    | -                   | -    | -      | -    |
| Maine                | 29 (23,36)               | 20 (16,26) | -30    | 14   | 864 (778,974)       | 517 (477,561) | -40.1  | 18   | -                        | -    | -      | -    | -                   | -    | -      | -    |
| Maryland             | 31 (25,39)               | 23 (18,29) | -27.4  | 46   | 912 (825,1036)      | 578 (535,624) | -36.6  | 45   | -                        | -    | -      | -    | -                   | -    | -      | -    |
| Massachusetts        | 28 (23,35)               | 20 (15,25) | -30.2  | 5    | 841 (761,938)       | 523 (483,567) | -37.8  | 23   | -                        | -    | -      | -    | -                   | -    | -      | -    |
| Michigan             | 30 (24,37)               | 21 (17,27) | -27.7  | 36   | 872 (791,976)       | 559 (516,603) | -35.8  | 41   | -                        | -    | -      | -    | -                   | -    | -      | -    |
| Minnesota            | 30 (24,37)               | 20 (16,26) | -32.4  | 19   | 896 (814,994)       | 542 (500,583) | -39.5  | 32   | -                        | -    | -      | -    | -                   | -    | -      | -    |
| Mississippi          | 30 (24,37)               | 21 (16,26) | -31.9  | 29   | 852 (771,950)       | 501 (464,543) | -41.2  | 4    | -                        | -    | -      | -    | -                   | -    | -      | -    |
| Missouri             | 31 (25,38)               | 21 (16,27) | -32.1  | 32   | 893 (809,995)       | 528 (487,567) | -41    | 24   | -                        | -    | -      | -    | -                   | -    | -      | -    |
| Montana              | 32 (26,40)               | 22 (17,28) | -31.2  | 43   | 942 (859,1048)      | 552 (510,595) | -41.5  | 39   | -                        | -    | -      | -    | -                   | -    | -      | -    |
| Nebraska             | 29 (23,36)               | 20 (16,26) | -29.4  | 27   | 866 (786,959)       | 540 (500,583) | -37.7  | 31   | -                        | -    | -      | -    | -                   | -    | -      | -    |

|                |            |            |       |    |                |               |       |    |   |   |   |   |   |   |   |   |
|----------------|------------|------------|-------|----|----------------|---------------|-------|----|---|---|---|---|---|---|---|---|
| Nevada         | 31 (25,38) | 22 (17,27) | -29.4 | 40 | 896 (812,999)  | 572 (530,616) | -36.2 | 43 | - | - | - | - | - | - | - | - |
| New Hampshire  | 29 (23,36) | 20 (16,26) | -29.8 | 23 | 868 (786,969)  | 528 (488,569) | -39.1 | 25 | - | - | - | - | - | - | - | - |
| New Jersey     | 29 (23,36) | 20 (16,26) | -28.4 | 28 | 852 (766,956)  | 558 (516,605) | -34.5 | 40 | - | - | - | - | - | - | - | - |
| New Mexico     | 33 (26,41) | 22 (17,28) | -32.3 | 45 | 940 (852,1046) | 549 (508,593) | -41.6 | 35 | - | - | - | - | - | - | - | - |
| New York       | 30 (24,37) | 19 (15,25) | -34.8 | 2  | 857 (771,974)  | 502 (462,542) | -41.4 | 5  | - | - | - | - | - | - | - | - |
| North Carolina | 31 (25,38) | 22 (17,28) | -28.8 | 41 | 898 (815,1001) | 569 (525,614) | -36.6 | 42 | - | - | - | - | - | - | - | - |
| North Dakota   | 29 (23,36) | 21 (17,27) | -26.5 | 34 | 869 (789,972)  | 550 (512,597) | -36.6 | 37 | - | - | - | - | - | - | - | - |
| Ohio           | 29 (23,36) | 20 (16,26) | -29.6 | 17 | 845 (761,945)  | 508 (468,551) | -39.9 | 9  | - | - | - | - | - | - | - | - |
| Oklahoma       | 30 (25,38) | 21 (17,27) | -29.9 | 35 | 889 (807,994)  | 521 (483,566) | -41.3 | 22 | - | - | - | - | - | - | - | - |
| Oregon         | 30 (24,37) | 20 (16,25) | -34.9 | 8  | 894 (812,995)  | 520 (481,561) | -41.9 | 20 | - | - | - | - | - | - | - | - |
| Pennsylvania   | 29 (23,35) | 20 (16,26) | -30.1 | 12 | 843 (760,933)  | 517 (477,558) | -38.7 | 17 | - | - | - | - | - | - | - | - |
| Rhode Island   | 29 (23,36) | 20 (16,26) | -30.4 | 16 | 862 (781,975)  | 529 (488,570) | -38.6 | 27 | - | - | - | - | - | - | - | - |
| South Carolina | 29 (24,36) | 20 (16,26) | -31.2 | 18 | 838 (762,934)  | 506 (466,545) | -39.7 | 6  | - | - | - | - | - | - | - | - |
| South Dakota   | 30 (24,37) | 21 (17,27) | -28.5 | 37 | 884 (803,973)  | 551 (509,594) | -37.7 | 38 | - | - | - | - | - | - | - | - |
| Tennessee      | 29 (24,36) | 20 (15,25) | -32.5 | 10 | 838 (760,930)  | 492 (453,532) | -41.3 | 1  | - | - | - | - | - | - | - | - |
| Texas          | 30 (24,37) | 20 (16,25) | -33   | 13 | 872 (790,968)  | 521 (483,563) | -40.3 | 21 | - | - | - | - | - | - | - | - |
| Utah           | 30 (24,38) | 20 (16,26) | -32.6 | 26 | 910 (824,1019) | 536 (496,578) | -41.2 | 30 | - | - | - | - | - | - | - | - |
| Vermont        | 30 (24,38) | 20 (16,26) | -32.4 | 24 | 887 (802,988)  | 533 (491,578) | -39.9 | 29 | - | - | - | - | - | - | - | - |
| Virginia       | 29 (23,36) | 19 (15,25) | -32.8 | 3  | 844 (766,942)  | 514 (474,556) | -39   | 15 | - | - | - | - | - | - | - | - |
| Washington     | 31 (25,39) | 20 (16,26) | -34.8 | 20 | 925 (837,1037) | 512 (473,552) | -44.7 | 12 | - | - | - | - | - | - | - | - |
| West Virginia  | 29 (24,37) | 20 (16,26) | -31.2 | 21 | 851 (771,951)  | 493 (455,532) | -42.1 | 2  | - | - | - | - | - | - | - | - |
| Wisconsin      | 31 (25,39) | 22 (17,28) | -30.7 | 38 | 931 (836,1052) | 550 (506,596) | -40.9 | 36 | - | - | - | - | - | - | - | - |

eTable 11. Age-adjusted incidence, prevalence, mortality, and disability-adjusted life years (DALY) rates per 100,000 for brain and nervous system cancer by US states in 1990 and 2017, and the percentage change between 1990 and 2017

| Location             | Incidence rates (95% UI) |          |        |      | Prevalence (95% UI) |            |        |      | Mortality rates (95% UI) |         |        |      | DALY rates (95% UI) |               |        |      |
|----------------------|--------------------------|----------|--------|------|---------------------|------------|--------|------|--------------------------|---------|--------|------|---------------------|---------------|--------|------|
|                      | 1990                     | 2017     | Change | Rank | 1990                | 2017       | Change | Rank | 1990                     | 2017    | Change | Rank | 1990                | 2017          | Change | Rank |
| Alabama              | 5 (4,6)                  | 7 (5,8)  | 28.8   | 35   | 17 (14,22)          | 28 (21,35) | 60.5   | 35   | 4 (3,4)                  | 4 (3,5) | 8.4    | 46   | 139 (111,151)       | 143 (115,166) | 2.5    | 42   |
| Alaska               | 5 (5,6)                  | 7 (6,9)  | 32.9   | 42   | 20 (16,25)          | 35 (27,44) | 77.2   | 46   | 4 (3,4)                  | 3 (3,4) | -5.7   | 15   | 123 (113,145)       | 117 (101,138) | -5.2   | 25   |
| Arizona              | 5 (5,6)                  | 7 (6,8)  | 28.7   | 33   | 21 (17,26)          | 32 (25,40) | 54.8   | 27   | 3 (3,4)                  | 4 (3,4) | 1.5    | 30   | 122 (108,136)       | 115 (101,135) | -5.4   | 24   |
| Arkansas             | 6 (4,7)                  | 7 (5,9)  | 25.6   | 22   | 19 (13,25)          | 30 (22,38) | 54.7   | 26   | 4 (3,5)                  | 4 (3,5) | 4.9    | 37   | 148 (109,161)       | 148 (114,174) | 0.1    | 37   |
| California           | 6 (5,7)                  | 7 (6,9)  | 18.8   | 7    | 23 (20,27)          | 35 (28,44) | 50.3   | 22   | 4 (3,4)                  | 3 (3,4) | -8.6   | 5    | 132 (110,140)       | 111 (96,133)  | -16    | 2    |
| Colorado             | 6 (5,7)                  | 8 (6,10) | 29.4   | 36   | 27 (22,32)          | 40 (32,49) | 48.8   | 18   | 4 (3,4)                  | 4 (3,4) | -1.2   | 27   | 126 (112,136)       | 119 (103,139) | -5.5   | 23   |
| Connecticut          | 7 (6,8)                  | 7 (6,9)  | 0.9    | 1    | 32 (27,39)          | 35 (28,44) | 7.1    | 1    | 4 (3,4)                  | 3 (3,4) | -5.7   | 16   | 125 (116,144)       | 108 (93,134)  | -13.3  | 5    |
| Delaware             | 5 (5,6)                  | 7 (6,9)  | 28.3   | 30   | 20 (16,25)          | 33 (25,43) | 65.6   | 38   | 4 (3,4)                  | 3 (3,4) | -6.5   | 10   | 124 (114,148)       | 113 (98,143)  | -8.2   | 18   |
| District of Columbia | 4 (4,9)                  | 5 (4,10) | 21.5   | 10   | 12 (10,24)          | 27 (19,51) | 127.1  | 50   | 4 (3,6)                  | 3 (2,5) | -21.3  | 1    | 137 (119,243)       | 101 (79,173)  | -25.9  | 1    |
| Florida              | 6 (5,7)                  | 8 (6,9)  | 21.9   | 13   | 26 (20,32)          | 38 (30,47) | 45.7   | 14   | 4 (3,4)                  | 4 (3,4) | -7     | 9    | 137 (115,146)       | 120 (105,140) | -12.6  | 8    |
| Georgia              | 5 (5,6)                  | 7 (6,8)  | 25.8   | 23   | 18 (16,23)          | 31 (25,40) | 69     | 40   | 4 (3,4)                  | 4 (3,4) | -5.3   | 17   | 128 (113,145)       | 114 (99,140)  | -11.1  | 12   |
| Hawaii               | 4 (3,7)                  | 6 (4,9)  | 35.3   | 44   | 19 (14,30)          | 30 (23,47) | 58.5   | 31   | 2 (2,4)                  | 2 (2,4) | 0.9    | 29   | 86 (74,130)         | 85 (69,133)   | -0.5   | 35   |
| Idaho                | 6 (5,7)                  | 7 (6,9)  | 24.8   | 19   | 23 (17,30)          | 33 (25,42) | 41.6   | 9    | 4 (3,4)                  | 4 (3,5) | 4.6    | 36   | 134 (105,145)       | 132 (102,154) | -1.6   | 31   |
| Illinois             | 5 (5,6)                  | 7 (6,9)  | 31.1   | 39   | 19 (16,24)          | 33 (27,44) | 72.3   | 43   | 4 (3,4)                  | 3 (3,4) | -6.2   | 12   | 127 (117,145)       | 113 (99,140)  | -11.3  | 10   |
| Indiana              | 6 (5,7)                  | 7 (6,9)  | 24.7   | 18   | 22 (18,27)          | 32 (26,40) | 46.4   | 16   | 4 (3,4)                  | 4 (3,5) | 3.5    | 33   | 132 (113,141)       | 131 (112,152) | -0.5   | 36   |
| Iowa                 | 7 (5,8)                  | 8 (6,10) | 20.2   | 8    | 29 (22,35)          | 39 (30,48) | 35.9   | 3    | 4 (3,4)                  | 4 (3,5) | 8.2    | 45   | 135 (109,145)       | 138 (110,160) | 2.7    | 43   |
| Kansas               | 6 (5,7)                  | 8 (6,10) | 27.1   | 26   | 27 (21,34)          | 38 (29,48) | 41     | 8    | 4 (3,4)                  | 4 (3,5) | 6.9    | 40   | 136 (110,146)       | 139 (111,160) | 2.1    | 41   |
| Kentucky             | 6 (5,7)                  | 7 (6,9)  | 24.9   | 20   | 23 (18,28)          | 33 (26,42) | 44.6   | 11   | 4 (3,4)                  | 4 (3,5) | 2.2    | 32   | 136 (111,146)       | 134 (112,159) | -1     | 33   |
| Louisiana            | 5 (4,6)                  | 6 (5,8)  | 28.5   | 32   | 17 (14,21)          | 28 (22,36) | 71.1   | 41   | 4 (3,4)                  | 4 (3,4) | 4.9    | 38   | 128 (112,150)       | 128 (110,157) | 0.1    | 38   |
| Maine                | 6 (5,7)                  | 9 (7,11) | 38.9   | 45   | 26 (21,32)          | 42 (33,53) | 59.7   | 34   | 4 (3,4)                  | 4 (3,5) | 8.2    | 44   | 127 (112,137)       | 133 (111,156) | 4.9    | 45   |
| Maryland             | 5 (5,7)                  | 7 (6,9)  | 28     | 28   | 21 (17,27)          | 35 (27,49) | 64.4   | 37   | 4 (3,4)                  | 3 (3,4) | -7.1   | 8    | 127 (117,152)       | 116 (100,154) | -8.5   | 17   |
| Massachusetts        | 7 (6,8)                  | 9 (7,11) | 33.2   | 43   | 30 (25,38)          | 45 (36,57) | 49.3   | 20   | 4 (4,4)                  | 4 (3,5) | 1.9    | 31   | 130 (120,146)       | 123 (107,147) | -5.1   | 26   |
| Michigan             | 6 (5,7)                  | 7 (6,9)  | 21.9   | 11   | 23 (18,28)          | 34 (28,43) | 49.9   | 21   | 4 (3,4)                  | 4 (3,5) | -1.3   | 25   | 139 (117,149)       | 130 (111,151) | -6.7   | 22   |
| Minnesota            | 7 (6,8)                  | 9 (7,11) | 25.2   | 21   | 32 (26,39)          | 45 (36,55) | 39.9   | 6    | 4 (3,4)                  | 4 (3,4) | -2.8   | 21   | 132 (111,142)       | 126 (105,146) | -4.7   | 29   |
| Mississippi          | 5 (4,6)                  | 6 (5,8)  | 24.6   | 17   | 15 (11,19)          | 25 (19,31) | 62     | 36   | 4 (3,4)                  | 4 (3,5) | 7      | 41   | 142 (109,155)       | 144 (113,169) | 1.2    | 40   |
| Missouri             | 6 (5,7)                  | 7 (6,9)  | 27     | 25   | 22 (18,26)          | 34 (27,43) | 57.1   | 30   | 4 (3,4)                  | 4 (3,4) | -1.7   | 24   | 132 (114,143)       | 126 (109,148) | -5     | 28   |
| Montana              | 6 (5,6)                  | 9 (6,11) | 52.2   | 49   | 22 (18,27)          | 42 (30,53) | 87.9   | 49   | 4 (3,4)                  | 4 (3,5) | 14.5   | 50   | 129 (111,140)       | 143 (112,171) | 10.4   | 48   |
| Nebraska             | 7 (5,8)                  | 8 (6,10) | 28.2   | 29   | 28 (22,34)          | 40 (31,50) | 45.2   | 13   | 4 (3,4)                  | 4 (3,5) | 4.2    | 34   | 140 (114,151)       | 138 (111,158) | -1     | 32   |

|                |         |           |      |    |            |            |      |    |         |         |      |    |               |               |       |    |
|----------------|---------|-----------|------|----|------------|------------|------|----|---------|---------|------|----|---------------|---------------|-------|----|
| Nevada         | 5 (4,6) | 6 (5,8)   | 17.5 | 5  | 18 (15,24) | 27 (21,36) | 45.9 | 15 | 4 (3,4) | 3 (3,4) | -6.3 | 11 | 120 (111,145) | 105 (91,133)  | -12.3 | 9  |
| New Hampshire  | 6 (6,7) | 9 (7,10)  | 32.7 | 41 | 28 (23,34) | 43 (34,54) | 53.7 | 25 | 4 (3,4) | 4 (3,4) | -1.3 | 26 | 128 (115,140) | 123 (106,142) | -4.4  | 30 |
| New Jersey     | 6 (5,7) | 7 (6,10)  | 20.7 | 9  | 24 (20,31) | 38 (30,52) | 56.3 | 28 | 4 (3,4) | 3 (3,4) | -9.9 | 3  | 123 (114,150) | 105 (90,139)  | -14.4 | 4  |
| New Mexico     | 4 (4,6) | 6 (5,8)   | 40.1 | 46 | 16 (13,20) | 29 (22,37) | 80.2 | 47 | 3 (3,4) | 3 (3,4) | 4.3  | 35 | 113 (105,136) | 113 (96,143)  | -0.7  | 34 |
| New York       | 5 (5,7) | 7 (6,9)   | 31.6 | 40 | 20 (16,26) | 35 (28,49) | 76   | 45 | 4 (3,4) | 3 (3,4) | -10  | 2  | 125 (117,154) | 105 (91,141)  | -15.5 | 3  |
| North Carolina | 5 (5,6) | 6 (5,8)   | 18.7 | 6  | 19 (16,24) | 29 (23,37) | 52.7 | 24 | 4 (3,4) | 4 (3,4) | -8.5 | 6  | 135 (113,146) | 117 (102,139) | -13.1 | 6  |
| North Dakota   | 6 (5,7) | 10 (8,12) | 52.6 | 50 | 27 (21,32) | 49 (37,61) | 83.7 | 48 | 4 (3,4) | 5 (4,5) | 11.7 | 48 | 138 (113,150) | 154 (122,177) | 11.4  | 49 |
| Ohio           | 6 (5,6) | 7 (6,9)   | 28.7 | 34 | 22 (18,27) | 33 (26,41) | 51.3 | 23 | 4 (3,4) | 4 (3,5) | 5.2  | 39 | 130 (114,140) | 130 (113,153) | 0.4   | 39 |
| Oklahoma       | 6 (5,6) | 7 (5,8)   | 22.8 | 14 | 22 (17,27) | 30 (23,39) | 39.1 | 4  | 4 (3,4) | 4 (3,5) | 7.8  | 42 | 132 (111,142) | 139 (112,163) | 5.1   | 46 |
| Oregon         | 7 (5,8) | 9 (7,11)  | 26.8 | 24 | 29 (22,37) | 43 (34,53) | 44.9 | 12 | 4 (3,5) | 4 (3,5) | -2   | 22 | 144 (111,156) | 134 (107,154) | -7.3  | 20 |
| Pennsylvania   | 6 (5,7) | 7 (6,9)   | 30   | 37 | 22 (18,28) | 35 (28,46) | 59.1 | 33 | 4 (3,4) | 4 (3,4) | -1.8 | 23 | 128 (117,143) | 120 (104,145) | -6.8  | 21 |
| Rhode Island   | 7 (5,7) | 8 (7,10)  | 21.9 | 12 | 27 (22,33) | 39 (31,49) | 43.8 | 10 | 4 (4,4) | 4 (3,4) | -7.8 | 7  | 139 (122,149) | 123 (107,144) | -11.2 | 11 |
| South Carolina | 5 (4,6) | 7 (5,8)   | 24.5 | 15 | 17 (13,20) | 28 (22,36) | 71.4 | 42 | 4 (3,4) | 4 (3,5) | -4.4 | 18 | 140 (112,152) | 126 (108,152) | -9.9  | 16 |
| South Dakota   | 6 (5,7) | 9 (6,11)  | 44.1 | 48 | 25 (18,31) | 43 (29,55) | 74.4 | 44 | 4 (3,5) | 5 (3,6) | 13.1 | 49 | 146 (110,160) | 163 (120,192) | 11.4  | 50 |
| Tennessee      | 6 (4,7) | 7 (5,8)   | 14.2 | 2  | 21 (15,26) | 29 (23,36) | 40.2 | 7  | 4 (3,5) | 4 (3,5) | -6.1 | 13 | 147 (110,159) | 131 (112,152) | -10.4 | 13 |
| Texas          | 6 (4,6) | 6 (5,8)   | 16.6 | 4  | 20 (16,24) | 30 (23,36) | 47.7 | 17 | 4 (3,4) | 4 (3,4) | -8.6 | 4  | 133 (108,142) | 116 (102,134) | -12.7 | 7  |
| Utah           | 5 (5,6) | 8 (6,9)   | 40.9 | 47 | 22 (18,26) | 36 (28,44) | 66.7 | 39 | 3 (3,4) | 4 (3,4) | 8    | 43 | 118 (100,131) | 122 (101,140) | 2.9   | 44 |
| Vermont        | 6 (5,7) | 8 (7,10)  | 31   | 38 | 25 (20,30) | 40 (32,49) | 57.1 | 29 | 4 (3,4) | 4 (3,4) | -4.4 | 19 | 129 (117,142) | 119 (104,138) | -7.6  | 19 |
| Virginia       | 5 (5,7) | 7 (6,9)   | 27.9 | 27 | 21 (18,27) | 34 (27,46) | 58.7 | 32 | 4 (3,4) | 3 (3,4) | -5.9 | 14 | 121 (113,143) | 109 (94,140)  | -10   | 15 |
| Washington     | 7 (5,7) | 8 (6,9)   | 14.5 | 3  | 27 (22,33) | 37 (30,45) | 35.6 | 2  | 4 (3,4) | 4 (3,5) | -4.1 | 20 | 141 (113,151) | 127 (102,144) | -10.3 | 14 |
| West Virginia  | 5 (4,6) | 6 (5,8)   | 28.4 | 31 | 18 (15,23) | 27 (21,34) | 49   | 19 | 4 (3,4) | 4 (3,5) | 10.7 | 47 | 122 (111,141) | 130 (108,154) | 6.7   | 47 |
| Wisconsin      | 7 (5,8) | 8 (7,10)  | 24.6 | 16 | 30 (24,37) | 42 (33,51) | 39.3 | 5  | 4 (3,4) | 4 (3,5) | -0.8 | 28 | 137 (113,146) | 130 (109,150) | -5    | 27 |

eTable 12. Age-adjusted incidence, prevalence, mortality, and disability-adjusted life years (DALY) rates per 100,000 for meningitis by US states in 1990 and 2017, and the percentage change between 1990 and 2017

| Location             | Incidence rates (95% UI) |            |        |      | Prevalence (95% UI) |            |        |      | Mortality rates (95% UI) |         |        |      | DALY rates (95% UI) |            |        |      |
|----------------------|--------------------------|------------|--------|------|---------------------|------------|--------|------|--------------------------|---------|--------|------|---------------------|------------|--------|------|
|                      | 1990                     | 2017       | Change | Rank | 1990                | 2017       | Change | Rank | 1990                     | 2017    | Change | Rank | 1990                | 2017       | Change | Rank |
| Alabama              | 19 (17,22)               | 12 (11,14) | -35.3  | 15   | 40 (35,46)          | 20 (17,22) | -51.1  | 12   | 1 (1,1)                  | 1 (0,1) | -53.6  | 47   | 73 (64,84)          | 32 (27,38) | -56.2  | 47   |
| Alaska               | 21 (18,24)               | 16 (14,18) | -24.9  | 33   | 42 (36,49)          | 26 (23,29) | -39    | 39   | 1 (1,1)                  | 0 (0,1) | -61.8  | 21   | 72 (59,85)          | 27 (22,32) | -62.6  | 27   |
| Arizona              | 21 (18,24)               | 16 (14,18) | -22.6  | 37   | 44 (38,50)          | 27 (24,31) | -38.2  | 40   | 1 (1,1)                  | 0 (0,0) | -61.5  | 23   | 62 (53,72)          | 22 (19,27) | -63.6  | 23   |
| Arkansas             | 19 (17,22)               | 13 (12,15) | -31.6  | 21   | 41 (35,47)          | 21 (19,24) | -48.2  | 21   | 1 (1,2)                  | 1 (0,1) | -60.5  | 26   | 87 (73,101)         | 31 (26,37) | -64.8  | 19   |
| California           | 19 (16,22)               | 14 (12,16) | -27.1  | 32   | 40 (35,46)          | 23 (20,26) | -42.9  | 33   | 1 (1,1)                  | 0 (0,0) | -74.8  | 2    | 70 (62,80)          | 16 (14,22) | -77.4  | 2    |
| Colorado             | 17 (15,20)               | 11 (10,12) | -36.5  | 11   | 38 (33,45)          | 18 (16,21) | -52.4  | 8    | 1 (1,1)                  | 0 (0,0) | -61.9  | 20   | 55 (47,66)          | 19 (16,22) | -65.6  | 17   |
| Connecticut          | 24 (21,27)               | 19 (17,22) | -21.4  | 39   | 49 (43,56)          | 30 (27,35) | -38.1  | 41   | 1 (1,1)                  | 0 (0,0) | -66.5  | 9    | 57 (46,66)          | 18 (16,22) | -68    | 11   |
| Delaware             | 17 (14,20)               | 10 (9,11)  | -40.1  | 3    | 36 (31,42)          | 16 (14,18) | -55.1  | 2    | 1 (1,1)                  | 0 (0,0) | -61.5  | 22   | 58 (49,68)          | 21 (17,26) | -64    | 22   |
| District of Columbia | 30 (27,34)               | 20 (18,22) | -35.5  | 14   | 53 (46,62)          | 29 (25,33) | -45.8  | 27   | 4 (2,4)                  | 1 (1,1) | -78.2  | 1    | 260 (148,323)       | 51 (38,64) | -80.5  | 1    |
| Florida              | 20 (18,23)               | 16 (14,18) | -20.5  | 41   | 42 (36,48)          | 26 (23,30) | -37.9  | 42   | 1 (1,1)                  | 0 (0,0) | -67.4  | 6    | 72 (62,83)          | 22 (18,27) | -70    | 6    |
| Georgia              | 21 (18,24)               | 15 (13,17) | -29.6  | 28   | 42 (37,49)          | 24 (21,27) | -43.5  | 32   | 1 (1,2)                  | 0 (0,1) | -64.7  | 13   | 80 (65,92)          | 26 (22,30) | -67.5  | 13   |
| Hawaii               | 16 (13,20)               | 11 (10,14) | -30.4  | 26   | 37 (32,44)          | 20 (18,23) | -45.9  | 26   | 1 (1,1)                  | 0 (0,0) | -61.4  | 24   | 47 (40,57)          | 17 (14,22) | -63.4  | 25   |
| Idaho                | 15 (12,18)               | 9 (8,10)   | -38.4  | 6    | 34 (29,41)          | 16 (14,18) | -54    | 5    | 1 (1,1)                  | 0 (0,0) | -66.7  | 8    | 49 (43,58)          | 14 (12,22) | -70.9  | 5    |
| Illinois             | 17 (15,20)               | 11 (10,13) | -36.6  | 10   | 37 (32,43)          | 18 (16,21) | -50.6  | 13   | 1 (1,1)                  | 0 (0,0) | -67.1  | 7    | 65 (57,74)          | 20 (17,23) | -69.6  | 8    |
| Indiana              | 20 (18,23)               | 15 (13,17) | -24.3  | 34   | 43 (37,49)          | 25 (22,29) | -41.8  | 34   | 1 (1,1)                  | 0 (0,1) | -54.5  | 44   | 55 (49,63)          | 24 (21,30) | -56.8  | 45   |
| Iowa                 | 18 (16,21)               | 14 (13,16) | -20.5  | 42   | 40 (35,47)          | 24 (21,28) | -39.5  | 37   | 1 (1,1)                  | 0 (0,0) | -56.4  | 40   | 43 (37,51)          | 18 (15,24) | -59    | 39   |
| Kansas               | 18 (15,21)               | 14 (12,16) | -21.1  | 40   | 39 (34,45)          | 23 (20,26) | -40.9  | 36   | 1 (1,1)                  | 0 (0,0) | -55    | 42   | 46 (40,54)          | 19 (16,25) | -58.8  | 41   |
| Kentucky             | 18 (16,21)               | 13 (11,15) | -30    | 27   | 40 (34,46)          | 21 (18,24) | -46.9  | 24   | 1 (1,1)                  | 0 (0,1) | -58.3  | 33   | 70 (62,80)          | 26 (22,33) | -63    | 26   |
| Louisiana            | 20 (17,23)               | 10 (9,12)  | -47.3  | 1    | 41 (36,48)          | 16 (14,19) | -60.4  | 1    | 2 (1,2)                  | 1 (1,1) | -57.2  | 38   | 93 (69,108)         | 37 (31,43) | -60.4  | 35   |
| Maine                | 16 (14,19)               | 11 (10,13) | -32.6  | 18   | 37 (32,43)          | 18 (16,21) | -49.7  | 17   | 1 (1,1)                  | 0 (0,0) | -53.2  | 48   | 44 (39,51)          | 20 (17,27) | -54.1  | 50   |
| Maryland             | 19 (16,22)               | 12 (11,14) | -35.9  | 12   | 38 (33,44)          | 19 (17,22) | -50.5  | 14   | 1 (1,1)                  | 0 (0,0) | -64.4  | 14   | 70 (57,80)          | 24 (20,27) | -66.3  | 15   |
| Massachusetts        | 26 (23,29)               | 21 (18,24) | -18.1  | 44   | 54 (47,62)          | 34 (30,39) | -36.9  | 45   | 1 (1,1)                  | 0 (0,0) | -59.5  | 27   | 47 (40,54)          | 19 (17,22) | -58.6  | 44   |
| Michigan             | 16 (13,19)               | 10 (9,12)  | -35.1  | 16   | 34 (29,40)          | 17 (15,20) | -49.9  | 16   | 1 (1,1)                  | 0 (0,0) | -59.2  | 32   | 51 (45,58)          | 20 (17,27) | -61.4  | 31   |
| Minnesota            | 16 (14,19)               | 12 (10,13) | -28.1  | 30   | 36 (31,42)          | 20 (17,22) | -46.2  | 25   | 1 (1,1)                  | 0 (0,0) | -63.4  | 16   | 42 (38,49)          | 15 (12,20) | -65.3  | 18   |
| Mississippi          | 20 (18,23)               | 14 (12,16) | -30.9  | 25   | 42 (37,49)          | 22 (19,25) | -48    | 22   | 1 (1,2)                  | 1 (1,1) | -58.1  | 34   | 94 (77,110)         | 36 (30,43) | -62.1  | 28   |
| Missouri             | 20 (17,23)               | 15 (13,17) | -24    | 35   | 41 (36,48)          | 24 (21,28) | -41.2  | 35   | 1 (1,1)                  | 0 (0,1) | -57.2  | 37   | 60 (52,70)          | 24 (20,29) | -60.2  | 36   |
| Montana              | 17 (15,20)               | 10 (9,12)  | -39.1  | 5    | 38 (33,45)          | 17 (15,20) | -55.1  | 3    | 1 (1,1)                  | 0 (0,1) | -54.3  | 46   | 53 (46,62)          | 22 (18,28) | -59.3  | 38   |
| Nebraska             | 16 (14,19)               | 11 (10,12) | -31.9  | 20   | 36 (31,42)          | 18 (16,21) | -49.4  | 18   | 1 (1,1)                  | 0 (0,0) | -59.4  | 30   | 44 (38,52)          | 16 (13,23) | -63.5  | 24   |



|                |            |            |       |    |            |            |       |    |         |         |       |    |            |            |       |    |
|----------------|------------|------------|-------|----|------------|------------|-------|----|---------|---------|-------|----|------------|------------|-------|----|
| Nevada         | 22 (20,26) | 18 (16,20) | -20.4 | 43 | 45 (40,52) | 30 (26,34) | -33.8 | 49 | 1 (1,2) | 0 (0,0) | -67.8 | 5  | 79 (63,93) | 24 (20,28) | -70   | 7  |
| New Hampshire  | 21 (18,24) | 17 (15,20) | -17.8 | 46 | 45 (39,52) | 28 (25,33) | -36.9 | 44 | 1 (1,1) | 0 (0,0) | -58.1 | 35 | 39 (34,46) | 16 (13,22) | -58.7 | 42 |
| New Jersey     | 18 (16,21) | 11 (9,12)  | -41.2 | 2  | 38 (33,44) | 17 (15,20) | -54.6 | 4  | 1 (1,1) | 0 (0,0) | -69.8 | 4  | 66 (52,76) | 19 (16,22) | -71.2 | 4  |
| New Mexico     | 19 (17,22) | 12 (11,14) | -37.1 | 7  | 41 (36,48) | 20 (17,23) | -52.2 | 9  | 1 (1,1) | 1 (0,1) | -57.5 | 36 | 73 (57,86) | 29 (24,34) | -61   | 33 |
| New York       | 21 (18,24) | 14 (12,16) | -31.5 | 22 | 41 (36,47) | 23 (20,26) | -45   | 30 | 1 (1,1) | 0 (0,0) | -72.5 | 3  | 76 (59,87) | 20 (18,24) | -73.3 | 3  |
| North Carolina | 19 (17,22) | 13 (11,15) | -32.5 | 19 | 40 (35,47) | 21 (18,24) | -48.2 | 20 | 1 (1,1) | 0 (0,0) | -65.6 | 11 | 72 (62,85) | 23 (20,28) | -67.9 | 12 |
| North Dakota   | 16 (14,19) | 12 (11,14) | -23.9 | 36 | 37 (32,43) | 20 (18,23) | -45.6 | 29 | 1 (1,1) | 0 (0,0) | -51.3 | 50 | 39 (34,48) | 18 (15,26) | -54.3 | 49 |
| Ohio           | 24 (21,28) | 20 (18,23) | -16.9 | 47 | 50 (44,58) | 33 (29,38) | -34.3 | 48 | 1 (1,1) | 0 (0,1) | -54.7 | 43 | 54 (48,62) | 24 (20,30) | -55.7 | 48 |
| Oklahoma       | 18 (15,21) | 11 (10,13) | -37   | 8  | 39 (34,45) | 18 (16,21) | -53.4 | 7  | 1 (1,1) | 1 (0,1) | -52.2 | 49 | 68 (57,80) | 30 (25,36) | -56.5 | 46 |
| Oregon         | 17 (15,20) | 12 (10,13) | -31.2 | 24 | 37 (32,44) | 20 (17,23) | -47.2 | 23 | 1 (1,1) | 0 (0,0) | -62.9 | 18 | 53 (45,62) | 18 (15,23) | -66   | 16 |
| Pennsylvania   | 19 (16,22) | 14 (12,15) | -27.4 | 31 | 40 (34,46) | 22 (19,25) | -44.9 | 31 | 1 (1,1) | 0 (0,0) | -59.5 | 28 | 56 (49,64) | 22 (19,26) | -60.8 | 34 |
| Rhode Island   | 22 (20,25) | 18 (16,21) | -16.7 | 48 | 47 (41,55) | 30 (26,34) | -36.9 | 46 | 1 (1,1) | 0 (0,0) | -63   | 17 | 54 (45,64) | 19 (16,23) | -64.4 | 21 |
| South Carolina | 19 (16,22) | 12 (10,13) | -36.9 | 9  | 40 (34,46) | 19 (17,22) | -51.9 | 11 | 1 (1,1) | 1 (0,1) | -61.2 | 25 | 77 (64,91) | 27 (23,32) | -64.8 | 20 |
| South Dakota   | 17 (15,20) | 12 (11,13) | -31.5 | 23 | 39 (33,45) | 19 (17,22) | -50.1 | 15 | 1 (1,1) | 0 (0,1) | -54.5 | 45 | 60 (50,71) | 25 (21,30) | -58.8 | 40 |
| Tennessee      | 25 (22,28) | 20 (18,23) | -18   | 45 | 51 (45,59) | 32 (28,37) | -37.1 | 43 | 1 (1,1) | 0 (0,1) | -59.4 | 29 | 67 (58,76) | 25 (21,32) | -62   | 29 |
| Texas          | 19 (16,22) | 12 (11,14) | -32.8 | 17 | 40 (34,46) | 21 (18,24) | -48.3 | 19 | 1 (1,1) | 0 (0,0) | -64.3 | 15 | 69 (56,79) | 23 (20,27) | -67.2 | 14 |
| Utah           | 17 (14,20) | 11 (9,12)  | -35.7 | 13 | 38 (33,44) | 18 (16,21) | -52.1 | 10 | 1 (1,1) | 0 (0,0) | -56.4 | 39 | 43 (38,53) | 18 (15,22) | -59.6 | 37 |
| Vermont        | 26 (23,30) | 22 (20,26) | -14.8 | 50 | 56 (49,65) | 37 (33,43) | -33.3 | 50 | 1 (1,1) | 0 (0,0) | -62.3 | 19 | 49 (42,58) | 19 (16,24) | -61.5 | 30 |
| Virginia       | 18 (16,21) | 11 (9,12)  | -40   | 4  | 38 (33,45) | 18 (16,20) | -53.7 | 6  | 1 (1,1) | 0 (0,0) | -65.3 | 12 | 67 (55,77) | 21 (18,25) | -68.1 | 10 |
| Washington     | 19 (17,22) | 15 (13,17) | -22.3 | 38 | 41 (36,47) | 25 (22,28) | -39.3 | 38 | 1 (1,1) | 0 (0,0) | -66.2 | 10 | 52 (46,61) | 16 (14,22) | -68.9 | 9  |
| West Virginia  | 25 (22,29) | 21 (18,24) | -16.6 | 49 | 54 (47,61) | 34 (30,39) | -35.8 | 47 | 1 (1,1) | 0 (0,1) | -55.3 | 41 | 66 (56,78) | 27 (23,36) | -58.6 | 43 |
| Wisconsin      | 17 (14,20) | 12 (11,14) | -28.3 | 29 | 37 (32,43) | 20 (18,23) | -45.7 | 28 | 1 (1,1) | 0 (0,0) | -59.3 | 31 | 44 (39,51) | 17 (15,23) | -61.1 | 32 |

eTable 13. Age-adjusted incidence, prevalence, mortality, and disability-adjusted life years (DALY) rates per 100,000 for encephalitis by US states in 1990 and 2017, and the percentage change between 1990 and 2017

| Location             | Incidence rates (95% UI) |         |        |      | Prevalence (95% UI) |          |        |      | Mortality rates (95% UI) |         |        |      | DALY rates (95% UI) |            |        |      |
|----------------------|--------------------------|---------|--------|------|---------------------|----------|--------|------|--------------------------|---------|--------|------|---------------------|------------|--------|------|
|                      | 1990                     | 2017    | Change | Rank | 1990                | 2017     | Change | Rank | 1990                     | 2017    | Change | Rank | 1990                | 2017       | Change | Rank |
| Alabama              | 5 (4,5)                  | 5 (4,5) | 0.1    | 28   | 7 (4,11)            | 6 (4,10) | -9.6   | 33   | 0 (0,0)                  | 0 (0,0) | -10.1  | 44   | 13 (9,15)           | 11 (8,13)  | -14.9  | 44   |
| Alaska               | 4 (4,4)                  | 4 (4,4) | -2.3   | 2    | 4 (3,6)             | 4 (3,5)  | -11    | 22   | 0 (0,0)                  | 0 (0,0) | -25.3  | 7    | 13 (10,15)          | 10 (8,11)  | -26    | 17   |
| Arizona              | 5 (5,5)                  | 5 (5,5) | -0.1   | 24   | 8 (4,12)            | 7 (4,11) | -7.7   | 45   | 0 (0,0)                  | 0 (0,0) | -22.7  | 12   | 11 (10,13)          | 8 (7,10)   | -28.3  | 11   |
| Arkansas             | 5 (5,5)                  | 5 (5,5) | -0.1   | 25   | 8 (5,12)            | 7 (4,11) | -11.9  | 13   | 0 (0,0)                  | 0 (0,0) | -12.1  | 37   | 13 (9,15)           | 11 (9,12)  | -18.9  | 33   |
| California           | 5 (5,5)                  | 5 (5,5) | -0.7   | 8    | 7 (4,11)            | 6 (4,9)  | -14    | 4    | 0 (0,0)                  | 0 (0,0) | -27.7  | 4    | 8 (7,11)            | 5 (5,9)    | -35    | 3    |
| Colorado             | 5 (5,5)                  | 5 (5,5) | -0.1   | 20   | 7 (4,11)            | 6 (4,9)  | -11.5  | 17   | 0 (0,0)                  | 0 (0,0) | -17.6  | 25   | 10 (9,12)           | 8 (7,9)    | -24.3  | 24   |
| Connecticut          | 5 (5,5)                  | 5 (5,5) | 0.3    | 34   | 7 (4,11)            | 6 (4,10) | -10.5  | 28   | 0 (0,0)                  | 0 (0,0) | -26    | 6    | 10 (8,11)           | 7 (6,9)    | -31.8  | 6    |
| Delaware             | 4 (4,4)                  | 4 (4,4) | -0.3   | 13   | 6 (3,8)             | 5 (3,8)  | -7.2   | 46   | 0 (0,0)                  | 0 (0,0) | -21.7  | 15   | 11 (9,12)           | 8 (7,10)   | -25.6  | 19   |
| District of Columbia | 6 (6,6)                  | 6 (6,6) | -0.2   | 17   | 7 (4,11)            | 6 (4,9)  | -9.2   | 37   | 1 (0,1)                  | 0 (0,0) | -48    | 1    | 41 (15,50)          | 18 (10,23) | -55    | 1    |
| Florida              | 5 (5,5)                  | 5 (5,5) | 1      | 49   | 7 (4,11)            | 7 (4,11) | -6.2   | 49   | 0 (0,0)                  | 0 (0,0) | -23.8  | 9    | 10 (9,11)           | 7 (6,9)    | -29.3  | 7    |
| Georgia              | 5 (5,5)                  | 5 (5,5) | 0.7    | 44   | 7 (4,11)            | 6 (4,10) | -6.9   | 48   | 0 (0,0)                  | 0 (0,0) | -23.3  | 11   | 13 (9,14)           | 9 (8,10)   | -29.2  | 9    |
| Hawaii               | 3 (2,3)                  | 3 (2,3) | -2.5   | 1    | 2 (2,4)             | 2 (1,3)  | -21.5  | 1    | 0 (0,0)                  | 0 (0,0) | -19.9  | 22   | 10 (9,11)           | 8 (7,9)    | -23.9  | 25   |
| Idaho                | 5 (5,5)                  | 5 (5,5) | 0.2    | 31   | 7 (4,11)            | 7 (4,10) | -9.4   | 35   | 0 (0,0)                  | 0 (0,0) | -17    | 28   | 9 (8,10)            | 7 (6,9)    | -25.5  | 20   |
| Illinois             | 5 (5,5)                  | 5 (5,5) | 0.5    | 39   | 8 (4,12)            | 7 (4,11) | -7.9   | 44   | 0 (0,0)                  | 0 (0,0) | -24.3  | 8    | 11 (9,12)           | 8 (7,9)    | -29.3  | 8    |
| Indiana              | 5 (5,5)                  | 5 (5,5) | 0.5    | 37   | 7 (4,12)            | 7 (4,10) | -9.9   | 30   | 0 (0,0)                  | 0 (0,0) | -11.3  | 38   | 10 (9,11)           | 8 (8,10)   | -15.9  | 40   |
| Iowa                 | 4 (4,4)                  | 4 (4,5) | 0.7    | 43   | 7 (4,10)            | 6 (3,9)  | -10.7  | 26   | 0 (0,0)                  | 0 (0,0) | -10.6  | 42   | 8 (7,10)            | 7 (5,10)   | -16.2  | 39   |
| Kansas               | 5 (5,5)                  | 5 (5,5) | -1     | 6    | 8 (4,12)            | 7 (4,11) | -12.2  | 11   | 0 (0,0)                  | 0 (0,0) | -10.1  | 45   | 9 (8,10)            | 8 (6,9)    | -17    | 37   |
| Kentucky             | 6 (6,7)                  | 6 (6,7) | 0.1    | 27   | 11 (6,17)           | 9 (5,15) | -11.1  | 20   | 0 (0,0)                  | 0 (0,0) | -10.1  | 43   | 11 (9,12)           | 9 (8,11)   | -16.5  | 38   |
| Louisiana            | 5 (4,5)                  | 5 (4,5) | -0.1   | 23   | 8 (4,13)            | 7 (4,11) | -13.6  | 5    | 0 (0,0)                  | 0 (0,0) | -12.5  | 36   | 14 (10,15)          | 12 (9,14)  | -14.7  | 45   |
| Maine                | 5 (5,5)                  | 5 (5,5) | 0.5    | 38   | 7 (4,11)            | 6 (4,10) | -8.9   | 40   | 0 (0,0)                  | 0 (0,0) | -11    | 40   | 8 (7,10)            | 7 (6,9)    | -13.8  | 47   |
| Maryland             | 6 (6,6)                  | 6 (6,6) | -0.4   | 11   | 8 (5,12)            | 7 (4,11) | -9.2   | 38   | 0 (0,0)                  | 0 (0,0) | -23.3  | 10   | 13 (9,14)           | 10 (8,11)  | -25.2  | 21   |
| Massachusetts        | 6 (6,6)                  | 6 (6,6) | 0.2    | 30   | 7 (4,11)            | 6 (4,10) | -12.3  | 10   | 0 (0,0)                  | 0 (0,0) | -20.6  | 18   | 11 (9,12)           | 8 (7,9)    | -24.5  | 23   |
| Michigan             | 5 (5,5)                  | 5 (5,5) | 0.7    | 45   | 6 (4,9)             | 6 (4,9)  | -8.1   | 43   | 0 (0,0)                  | 0 (0,0) | -15.2  | 30   | 10 (9,10)           | 8 (7,9)    | -19    | 32   |
| Minnesota            | 4 (4,4)                  | 4 (4,4) | -0.1   | 21   | 6 (4,10)            | 6 (3,9)  | -11    | 21   | 0 (0,0)                  | 0 (0,0) | -14.8  | 31   | 7 (6,9)             | 6 (5,9)    | -18.3  | 35   |
| Mississippi          | 4 (3,4)                  | 4 (3,4) | -1.1   | 5    | 6 (3,9)             | 5 (3,8)  | -12.8  | 9    | 0 (0,0)                  | 0 (0,0) | -10.8  | 41   | 13 (9,15)           | 11 (9,13)  | -15.7  | 41   |
| Missouri             | 5 (5,6)                  | 5 (5,6) | 0.8    | 46   | 8 (5,12)            | 7 (4,11) | -9     | 39   | 0 (0,0)                  | 0 (0,0) | -13.4  | 34   | 10 (9,11)           | 8 (7,9)    | -18.4  | 34   |
| Montana              | 6 (5,6)                  | 6 (6,6) | 0.7    | 41   | 9 (5,14)            | 8 (5,12) | -11.9  | 12   | 0 (0,0)                  | 0 (0,0) | -8.6   | 47   | 10 (9,12)           | 9 (8,10)   | -14.6  | 46   |
| Nebraska             | 4 (4,4)                  | 4 (4,4) | -0.5   | 9    | 5 (3,8)             | 5 (3,7)  | -11.5  | 18   | 0 (0,0)                  | 0 (0,0) | -13.5  | 33   | 9 (8,10)            | 7 (6,10)   | -20.6  | 30   |

|                |         |         |      |    |           |          |       |    |         |         |       |    |            |           |       |    |
|----------------|---------|---------|------|----|-----------|----------|-------|----|---------|---------|-------|----|------------|-----------|-------|----|
| Nevada         | 5 (5,5) | 5 (5,5) | 0.5  | 40 | 6 (4,10)  | 6 (4,9)  | -3.9  | 50 | 0 (0,0) | 0 (0,0) | -26.4 | 5  | 12 (9,13)  | 8 (7,9)   | -32   | 5  |
| New Hampshire  | 5 (5,5) | 5 (5,5) | 0.9  | 48 | 7 (4,10)  | 6 (4,9)  | -11.9 | 14 | 0 (0,0) | 0 (0,0) | -17.1 | 27 | 8 (7,10)   | 6 (5,9)   | -22.2 | 27 |
| New Jersey     | 5 (5,5) | 5 (5,5) | 0.3  | 32 | 7 (4,10)  | 6 (4,9)  | -8.2  | 42 | 0 (0,0) | 0 (0,0) | -30.4 | 3  | 12 (9,13)  | 8 (7,10)  | -35   | 4  |
| New Mexico     | 6 (6,6) | 6 (6,6) | -0.2 | 18 | 10 (6,15) | 9 (5,14) | -11.1 | 19 | 0 (0,0) | 0 (0,0) | -17.2 | 26 | 13 (10,15) | 11 (9,12) | -21.3 | 29 |
| New York       | 6 (6,6) | 6 (6,6) | 0.7  | 42 | 8 (5,12)  | 7 (4,11) | -7.1  | 47 | 0 (0,0) | 0 (0,0) | -33.9 | 2  | 10 (9,11)  | 6 (5,10)  | -37   | 2  |
| North Carolina | 5 (4,5) | 5 (4,5) | -0.2 | 16 | 7 (4,11)  | 6 (4,10) | -8.4  | 41 | 0 (0,0) | 0 (0,0) | -21.7 | 16 | 11 (9,13)  | 8 (7,9)   | -27.4 | 13 |
| North Dakota   | 4 (4,4) | 4 (4,4) | -0.4 | 10 | 7 (4,11)  | 6 (3,9)  | -17.1 | 2  | 0 (0,0) | 0 (0,0) | -4.5  | 49 | 9 (8,10)   | 8 (7,11)  | -8    | 50 |
| Ohio           | 5 (5,5) | 5 (5,5) | 0.3  | 33 | 7 (4,11)  | 6 (4,10) | -9.3  | 36 | 0 (0,0) | 0 (0,0) | -11.1 | 39 | 9 (8,10)   | 8 (7,10)  | -15.5 | 42 |
| Oklahoma       | 5 (5,5) | 5 (5,5) | 0.4  | 35 | 7 (4,11)  | 6 (4,10) | -13.3 | 7  | 0 (0,0) | 0 (0,0) | -3.3  | 50 | 10 (9,11)  | 9 (8,11)  | -8.3  | 49 |
| Oregon         | 3 (3,4) | 3 (3,3) | -1.8 | 3  | 5 (3,8)   | 4 (3,7)  | -10.1 | 29 | 0 (0,0) | 0 (0,0) | -19.4 | 23 | 9 (8,10)   | 6 (5,9)   | -27.1 | 14 |
| Pennsylvania   | 5 (5,5) | 5 (5,5) | 0.2  | 29 | 8 (4,12)  | 7 (4,11) | -10.7 | 25 | 0 (0,0) | 0 (0,0) | -20   | 21 | 10 (9,11)  | 8 (7,9)   | -23.2 | 26 |
| Rhode Island   | 4 (4,5) | 4 (4,5) | -0.2 | 14 | 6 (4,10)  | 6 (3,9)  | -9.5  | 34 | 0 (0,0) | 0 (0,0) | -21.9 | 14 | 12 (9,13)  | 8 (7,10)  | -29.2 | 10 |
| South Carolina | 5 (5,5) | 5 (5,5) | 0.1  | 26 | 7 (4,12)  | 7 (4,10) | -9.7  | 32 | 0 (0,0) | 0 (0,0) | -19.2 | 24 | 13 (9,15)  | 10 (8,11) | -25.8 | 18 |
| South Dakota   | 4 (4,4) | 4 (4,4) | -0.2 | 15 | 5 (3,8)   | 5 (3,7)  | -13.2 | 8  | 0 (0,0) | 0 (0,0) | -8.6  | 48 | 11 (9,12)  | 9 (8,11)  | -12.5 | 48 |
| Tennessee      | 5 (5,5) | 5 (5,5) | 0.5  | 36 | 8 (4,12)  | 7 (4,10) | -11.5 | 16 | 0 (0,0) | 0 (0,0) | -14.7 | 32 | 10 (9,11)  | 8 (7,10)  | -21.5 | 28 |
| Texas          | 5 (5,6) | 6 (5,6) | 0.9  | 47 | 8 (5,13)  | 7 (4,11) | -10.8 | 24 | 0 (0,0) | 0 (0,0) | -20   | 20 | 12 (9,13)  | 8 (7,10)  | -26.6 | 15 |
| Utah           | 4 (4,4) | 4 (4,4) | -1.3 | 4  | 6 (4,9)   | 5 (3,8)  | -13.4 | 6  | 0 (0,0) | 0 (0,0) | -12.6 | 35 | 10 (9,11)  | 8 (7,10)  | -17.5 | 36 |
| Vermont        | 4 (4,4) | 4 (4,4) | -0.1 | 19 | 4 (3,6)   | 4 (3,5)  | -14.7 | 3  | 0 (0,0) | 0 (0,0) | -20.5 | 19 | 8 (7,10)   | 6 (5,9)   | -24.8 | 22 |
| Virginia       | 4 (4,5) | 4 (4,5) | -0.1 | 22 | 6 (4,10)  | 6 (3,9)  | -9.8  | 31 | 0 (0,0) | 0 (0,0) | -22.5 | 13 | 12 (9,13)  | 9 (7,10)  | -26.1 | 16 |
| Washington     | 4 (3,4) | 4 (3,4) | -0.8 | 7  | 5 (3,8)   | 4 (3,7)  | -11.6 | 15 | 0 (0,0) | 0 (0,0) | -20.8 | 17 | 8 (7,10)   | 6 (5,9)   | -27.6 | 12 |
| West Virginia  | 6 (5,6) | 6 (5,6) | 1    | 50 | 9 (5,13)  | 8 (4,12) | -10.5 | 27 | 0 (0,0) | 0 (0,0) | -8.9  | 46 | 11 (10,13) | 10 (8,11) | -15.1 | 43 |
| Wisconsin      | 4 (4,4) | 4 (4,4) | -0.3 | 12 | 6 (4,9)   | 5 (3,8)  | -10.9 | 23 | 0 (0,0) | 0 (0,0) | -15.9 | 29 | 8 (8,10)   | 7 (6,9)   | -20.5 | 31 |
